# Supplementary material
Source: Research Square preprint supplement (doi:10.21203/rs.3.rs-10339560/v1)
Supplement: Supplementary file 1 [file 0edfc31030a8befd757c5de3.xlsx]

## Sheet: Data S1
Data S1. The list of sulfur-cycling marker genes (n=42) analyzed in this study.
Category	Gene name	Product Name
DMS(O) metabolism	dsyB	Methylthiohydroxybutryate methyltransferase
DMS(O) metabolism	dddX	ATP-dependent DMSP lyase, DddX
DMS(O) metabolism	dddY	Dimethylsulfonioproprionate lyase DddY
DMS(O) metabolism	dddW	Dimethylsulfonioproprionate lyase DddK
DMS(O) metabolism	dddD	CoA-transferase/lyase DddD
DMS(O) metabolism	tmm	Trimethylamine (TMA) monooxygenase
DMS(O) metabolism	mmtN	Methionine methyltransferase, mmtN
DMS(O) metabolism	dmsA	Dimethyl sulfoxide reductase DmsA
DMS(O) metabolism	dddL	Dimethylsulfonioproprionate lyase, DddL
DMS(O) metabolism	dddP	Dimethylsulfonioproprionate lyase, DddP
DMS(O) metabolism	dddQ	Dimethylsulfonioproprionate lyase, DddQ
DMS(O) metabolism	dsoB	Dimethylsulfide oxygenase component DsoB
DMS(O) metabolism	mddA	Methanethiol S-methyltransferase
DMS(O) metabolism	msmA	Methanesulfonate monooxygenase hydroxylase subunit alpha
DMS(O) metabolism	mtoX	Methanethiol oxidase
DMS(O) metabolism	mtsA	Methylated-thiol--coenzyme M methyltransferase
DMS(O) metabolism	sfnG	FMNH(2)-dependent dimethylsulfone monooxygenase
DMS(O) metabolism	ssuD	Alkanesulfonate monooxygenase
DMS(O) metabolism	dmoA	Dimethyl-sulfide monooxygenase
SQ metabolism	yihQ	Sulfoquinovosidase, YihQ
Sulfur Oxidation	soxB	S-sulfosulfanyl-L-cysteine sulfohydrolase, soxB
Sulfur Oxidation	fccB	Sulfide dehydrogenase [flavocytochrome c] flavoprotein chain, FccB
Sulfur Oxidation	soeA	Sulfite dehydrogenase subunit A
Sulfur Oxidation	sqr	Sulfide quinone oxidoreductase, Sqr
Sulfur Oxidation	tsdA#	Thiosulfate dehydrogenase, TsdA
Sulfur Oxidation	sorT	Sulfite oxidase
Sulfur Oxidation	sorA	Sulfite:cytochrome c oxidoreductase molybdenum subunit
Sulfur Oxidation	sdo	Sulfur dioxygenase, Sdo
Sulfur Oxidation	doxD	Thiosulfate dehydrogenase [quinone] large subunit
Sulfur Oxidation	doxDA	Thiosulfate dehydrogenase [quinone]
Sulfur Oxidation	sHdrB1	Sulfur-oxidizing heterodisulfide reductase like complex, subunit sHdrB1
Sulfur Reduction	dsrA*	Dissimilatory sulfite reductase subunit A, DsrA
Sulfur Reduction	dsrB*	Dissimilatory sulfite reductase subunit B, DsrB
Sulfur Reduction	aprA*	Adenylyl-sulfate reductase subunit alpha, AprA
Sulfur Reduction	ttrA	Tetrathionate reductase subunit A, TtrA
Sulfur Reduction	phsA	Thiosulfate reductase molybdopterin-containing subunit, PhsA
Sulfur Reduction	otr	Octaheme tetrathionate reductase Otr
Sulfur Reduction	asrA	Anaerobic sulfite reductase subunit A, AsrA
Sulfur Reduction	mccA	Octaheme dissimilatory sulfite reductase, MccA
Sulfur Reduction	shyB	Sulfhydrogenase 2 subunit beta, ShyB
Sulfur Reduction	sudA	Sulfide dehydrogenase subunit alpha, SudA
Sulfur Reduction	npsr	NADH-dependent persulfide reductase, Npsr
#: note that homologs of tsdA can operate in reverse direction for tetrathionate reduction, though it is classified under the sulfur oxidation category in our study
*: note that homologs of dsrAB and aprA are also involved in a reversal of dissimilatory sulfate reduction pathway, though they are classified under the sulfur reduction category in our study

## Sheet: Data S2
Data S2. Congruence analysis between gene phylogeny and species phylogeny. Linear regression analysis was applied to fit the scatterplot of evolutionary distances between genes vs. the distances between the corresponding genomes (Figure 1e). The goodness of fit (R2), the slope of the linear regression line, and statistical significance (P adjusted via FDR procedure) are shown for each sulfur-cycl…
Category	Gene	Ortholog Clade	Bacterial tree of life			Archaeal tree of life
			R2	Slope	Padj	R2	Slope	Padj
DMS(O) metabolism*	dsoB	dsoB	0.9	2.07	5e-08
	mtsA	mtsA				0.78	0.19	1e-34
	dddX	dddX_1	0.86	0.76	4e-184
	dddY	dddY	0.53	0.46	6e-156
	msmA	msmA	0.82	0.51	0
	dddQ	dddQ	0.66	2.55	0
	dsyB	dsyB	0.76	0.89	0
	dddD	dddD	0.85	0.41	0
	dddL	dddL	0.68	0.77	0
	mddA	mddA1	0.89	3.22	0
		mddA2	0.92	10.62	1e-253
		mddA3	0.42	1.02	4e-74
	mtoX	mtoX	0.87	0.5	0
	dmoA	dmoA	0.88	0.41	0
	dmsA	bacterial_dmsA	0.75	0.63	0
		archaeal_dmsA				0.81	0.88	3e-135
	dddP	dddP	0.83	0.92	0
	tmm	tmm	0.92	0.38	0
	mmtN	mmtN	0.918387	0.424208	1.67474e-236
	sfnG	sfnG	0.92	0.39	0	0.95	0.48	7e-98
	ssuD	ssuD	0.89	0.49	0
SQ metabolism	yihQ	yihQ	0.92	0.58	0
Sulfur oxidation	doxD	doxD	0.97	0.69	8e-16	0.65	0.55	5e-160
	sorT	sorT1	0.95	0.52	0
		sorT2	0.7	0.85	5e-105
	doxDA	doxDA	0.9	0.8	0
	soeA	soeA_sreA	0.93	0.65	0
	sorA	sorA1	0.87	0.77	0
		sorA2	0.9	0.56	0
		sorA3	0.87	0.54	0
	fccB	fccB	0.87	1.05	0
	tsdA	tsdA	0.9	0.82	0	0.45	0.69	4e-39
	soxB	putative_soxB	0.87	0.8	0	0.88	0.84	0
		soxB	0.94	0.74	0
	sqr	sqrI	0.93	0.65	0
		sqrII	0.92	0.81	0
		sqrIII	0.87	0.81	0	0.98	0.52	0
		sqrIV	0.93	0.48	0
		sqrV	1	0.33	7e-17	0.9	0.27	1e-282
		sqrVI	0.92	0.52	0
	sdo	ETHE1	0.9	0.81	0
		sdoA	0.87	0.79	0
		sdoS1	0.6	0.59	2e-18
		sdoS2	0.86	0.64	0
	sHdrB1	sHdrB1	0.918693	0.464542	0	0.148813	0.97574	1.50987e-16
Sulfur reduction	sudA	sudA				0.54	0.51	0
	mccA	mccA	0.83	0.46	0
	asrA	asrA	0.88	0.78	0
	npsr	npsr	0.92	0.63	0
	aprA	aprA	0.88	0.58	0	0.87	0.34	3e-155
	ttrA	ttrA	0.91	0.93	0	0.94	0.65	0
	otr	otr	0.76	0.92	0	0.8	1.06	2e-104
	dsrB	dsrB	0.88	0.61	0	0.93	0.53	3e-68
		oxidative_dsrB	0.92	0.37	0
		reductive_dsrB	0.92	0.6	0	0.94	0.64	1e-94
		archaeal_dsrB				0.72	0.75	5e-64
	dsrA	dsrA	0.78	0.65	0	0.91	0.67	1e-70
		oxidative_dsrA	0.92	0.47	0
		reductive_dsrA	0.93	0.64	0	0.85	0.43	7e-71
		archaeal_dsrA				0.84	1.05	3e-102
	phsA	phsA_psrA	0.95	0.93	0	0.88	0.6	4e-25
	shyB	shyB	0.9	1.07	0	0.92	0.75	0
* dddW was not included in the calculation as only two sequences were retrieved from the whole GTDB r95 genomes.

## Sheet: Data S3
Data S3. Genes and hidden markov models (HMMs) used to analyze the major biochemical capacities of sulfur microbes.
System	Subsystem	Short_Name	Name	HMM	Threshold	Source of HMM
cellulose	cellulose	endoglucanase GH12	endoglucanase	GH12	HMM_DomainE:1e-15;Cov:0.4	CAZymes
cellulose	cellulose	endoglucanase GH124	endoglucanase	GH124	HMM_DomainE:1e-15;Cov:0.4	CAZymes
cellulose	cellulose	exoglucanase GH39	exo-beta-1,4-glucanase / cellodextrinase	GH39	HMM_DomainE:1e-15;Cov:0.4	CAZymes
cellulose	cellulose	endoglucanase GH48	reducing end-acting cellobiohydrolase	GH48	HMM_DomainE:1e-15;Cov:0.4	CAZymes
cellulose	cellulose	endoglucanase GH48	endo-beta-1,4-glucanase	GH48	HMM_DomainE:1e-15;Cov:0.4	CAZymes
cellulose	cellulose	exoglucanase GH5	cellulose beta-1,4-cellobiosidase	GH5	HMM_DomainE:1e-15;Cov:0.4	CAZymes
cellulose	cellulose	exoglucanase GH5	exo-beta-1,4-glucanase / cellodextrinase	GH5	HMM_DomainE:1e-15;Cov:0.4	CAZymes
cellulose	cellulose	endoglucanase GH6	endoglucanase	GH6	HMM_DomainE:1e-15;Cov:0.4	CAZymes
cellulose	cellulose	endoglucanase GH6	lichenase / endo-beta-1,3-1,4-glucanase	GH6	HMM_DomainE:1e-15;Cov:0.4	CAZymes
cellulose	cellulose	exoglucanase GH6	cellobiohydrolase	GH6	HMM_DomainE:1e-15;Cov:0.4	CAZymes
cellulose	cellulose	endoglucanase GH7	endo-beta-1,3-1,4-glucanase	GH7	HMM_DomainE:1e-15;Cov:0.4	CAZymes
cellulose	cellulose	endoglucanase GH7	reducing end-acting cellobiohydrolase	GH7	HMM_DomainE:1e-15;Cov:0.4	CAZymes
cellulose	cellulose	endoglucanase GH7	endo-beta-1,4-glucanase	GH7	HMM_DomainE:1e-15;Cov:0.4	CAZymes
cellulose	cellulose	endoglucanase GH74	endoglucanase	GH74	HMM_DomainE:1e-15;Cov:0.4	CAZymes
cellulose	cellulose	endoglucanase GH8	cellulase	GH8	HMM_DomainE:1e-15;Cov:0.4	CAZymes
cellulose	cellulose	endoglucanase GH9	endoglucanase	GH9	HMM_DomainE:1e-15;Cov:0.4	CAZymes
cellulose	cellulose	exoglucanase GH9	exo-beta-1,4-glucanase / cellodextrinase	GH9	HMM_DomainE:1e-15;Cov:0.4	CAZymes
cellulose	cellulose	exoglucanase GH9	cellobiohydrolase	GH9	HMM_DomainE:1e-15;Cov:0.4	CAZymes
cellulose	cellulose	cellobiose phosphorylase GH94	cellobionic acid phosphorylase	GH94	HMM_DomainE:1e-15;Cov:0.4	CAZymes
cellulose	cellulose	cellobiose phosphorylase GH94	cellobiose phosphorylase	GH94	HMM_DomainE:1e-15;Cov:0.4	CAZymes
cellulose	cellulose	cellobiose phosphorylase GH94	cellodextrin phosphorylase	GH94	HMM_DomainE:1e-15;Cov:0.4	CAZymes
chitin	chitin	chitin beta-1,6-glucanosyltransferase GH16	chitin beta-1,6-glucanosyltransferase	GH16	HMM_DomainE:1e-15;Cov:0.4	CAZymes
chitin	chitin	endochitinase GH18	chitinase	GH18	HMM_DomainE:1e-15;Cov:0.4	CAZymes
chitin	chitin	endochitinase GH18	Nod factor hydrolase	GH18	HMM_DomainE:1e-15;Cov:0.4	CAZymes
chitin	chitin	endochitinase GH19	chitinase	GH19	HMM_DomainE:1e-15;Cov:0.4	CAZymes
chitin	chitin	endochitinase GH19	chitinase	GH19	HMM_DomainE:1e-15;Cov:0.4	CAZymes
chitin	chitin	endochitinase GH23	chitinase	GH23	HMM_DomainE:1e-15;Cov:0.4	CAZymes
chitin	chitin	beta-N-acetylhexosaminidase GH3	beta-N-acetylhexosaminidase	GH3	HMM_DomainE:1e-15;Cov:0.4	CAZymes
chitin	chitin	beta-N-acetylhexosaminidase GH35	exo-beta-glucosaminidase	GH35	HMM_DomainE:1e-15;Cov:0.4	CAZymes
chitin	chitin	endochitinase GH48	chitinase	GH48	HMM_DomainE:1e-15;Cov:0.4	CAZymes
chitin	chitin	beta-N-acetylhexosaminidase GH5	beta-N-acetylhexosaminidase	GH5	HMM_DomainE:1e-15;Cov:0.4	CAZymes
chitin	chitin	chitobiose phosphorylase GH94	4-O-Î²-D-glucosyl-D-galactose phosphorylase	GH94	HMM_DomainE:1e-15;Cov:0.4	CAZymes
chitin	chitin	chitobiose phosphorylase GH94	chitobiose phosphorylase	GH94	HMM_DomainE:1e-15;Cov:0.4	CAZymes
xylan	xylan	beta-xylosidase GH1	beta-xylosidase	GH1	HMM_DomainE:1e-15;Cov:0.4	CAZymes
xylan	xylan	endoxylanase GH10	[retaining] arabinoxylan-specific endo-beta-1,4-xylanase	GH10	HMM_DomainE:1e-15;Cov:0.4	CAZymes
xylan	xylan	endoxylanase GH10	xylan endotransglycosylase	GH10	HMM_DomainE:1e-15;Cov:0.4	CAZymes
xylan	xylan	endoxylanase GH10	endo-1,3-beta-xylanase	GH10	HMM_DomainE:1e-15;Cov:0.4	CAZymes
xylan	xylan	endoxylanase GH10	endo-1,4-beta-xylanase	GH10	HMM_DomainE:1e-15;Cov:0.4	CAZymes
xylan	xylan	beta-xylosidase GH11	exo-1,4-beta-xylosidase	GH11	HMM_DomainE:1e-15;Cov:0.4	CAZymes
xylan	xylan	endoxylanase GH11	endo-beta-1,4-xylanase	GH11	HMM_DomainE:1e-15;Cov:0.4	CAZymes
xylan	xylan	glucuronidase GH115	xylan alpha-1,2-glucuronidase	GH115	HMM_DomainE:1e-15;Cov:0.4	CAZymes
xylan	xylan	beta-xylosidase GH120	beta-xylosidase	GH120	HMM_DomainE:1e-15;Cov:0.4	CAZymes
xylan	xylan	endoxylanase GH141	xylanase	GH141	HMM_DomainE:1e-15;Cov:0.4	CAZymes
xylan	xylan	beta-xylosidase GH2	beta-xylosidase	GH2	HMM_DomainE:1e-15;Cov:0.4	CAZymes
xylan	xylan	endoxylanase GH26	beta-1,3-xylanase	GH26	HMM_DomainE:1e-15;Cov:0.4	CAZymes
xylan	xylan	beta-xylosidase GH3	xylan 1,4-beta-xylosidase	GH3	HMM_DomainE:1e-15;Cov:0.4	CAZymes
xylan	xylan	beta-xylosidase GH30	[reducing end] beta-xylosidase	GH30	HMM_DomainE:1e-15;Cov:0.4	CAZymes
xylan	xylan	endoxylanase GH30	glucuronoarabinoxylan endo-beta-1,4-xylanase	GH30	HMM_DomainE:1e-15;Cov:0.4	CAZymes
xylan	xylan	beta-xylosidase GH30	beta-xylosidase	GH30	HMM_DomainE:1e-15;Cov:0.4	CAZymes
xylan	xylan	endoxylanase GH30	endo-beta-1,4-xylanase	GH30	HMM_DomainE:1e-15;Cov:0.4	CAZymes
xylan	xylan	alpha-L-arabinofuranosidase GH39	alpha-L-arabinofuranosidase	GH39	HMM_DomainE:1e-15;Cov:0.4	CAZymes
xylan	xylan	beta-xylosidase GH39	beta-xylosidase	GH39	HMM_DomainE:1e-15;Cov:0.4	CAZymes
xylan	xylan	alpha-glucuronidase GH4	alpha-glucuronidase	GH4	HMM_DomainE:1e-15;Cov:0.4	CAZymes
xylan	xylan	alpha-L-arabinofuranosidase GH43	alpha-L-arabinofuranosidase	GH43	HMM_DomainE:1e-15;Cov:0.4	CAZymes
xylan	xylan	beta-xylosidase GH43	beta-1,3-xylosidase	GH43	HMM_DomainE:1e-15;Cov:0.4	CAZymes
xylan	xylan	beta-xylosidase GH43	beta-xylosidase	GH43	HMM_DomainE:1e-15;Cov:0.4	CAZymes
xylan	xylan	endoxylanase GH43	xylanase	GH43	HMM_DomainE:1e-15;Cov:0.4	CAZymes
xylan	xylan	endoxylanase GH5	arabinoxylan-specific endo-beta-1,4-xylanase	GH5	HMM_DomainE:1e-15;Cov:0.4	CAZymes
xylan	xylan	endoxylanase GH5	endo-beta-1,4-xylanase	GH5	HMM_DomainE:1e-15;Cov:0.4	CAZymes
xylan	xylan	endoxylanase GH51	endo-beta-1,4-xylanase	GH51	HMM_DomainE:1e-15;Cov:0.4	CAZymes
xylan	xylan	beta-xylosidase GH52	beta-xylosidase	GH52	HMM_DomainE:1e-15;Cov:0.4	CAZymes
xylan	xylan	beta-xylosidase GH54	beta-xylosidase	GH54	HMM_DomainE:1e-15;Cov:0.4	CAZymes
xylan	xylan	glucuronidase GH67	xylan alpha-1,2-glucuronidase	GH67	HMM_DomainE:1e-15;Cov:0.4	CAZymes
xylan	xylan	glucuronidase GH67	alpha-glucuronidase	GH67	HMM_DomainE:1e-15;Cov:0.4	CAZymes
xylan	xylan	exoxylanase GH8	reducing-end-xylose releasing exo-oligoxylanase	GH8	HMM_DomainE:1e-15;Cov:0.4	CAZymes
xylan	xylan	endoxylanase GH8	endo-1,4-beta-xylanase	GH8	HMM_DomainE:1e-15;Cov:0.4	CAZymes
xylan	xylan	endoxylanase GH98	endo-beta-1,4-xylanase	GH98	HMM_DomainE:1e-15;Cov:0.4	CAZymes
dissimilatory_iron_reduction	CymA	PF03264	Tetraheme cytochrome CymA; The HMM is supposed to be more sensitivity than CymA	FeRed/PF03264	HMM_FullMode:--cut_tc	FeGenie
dissimilatory_iron_reduction	CymA	CymA	Tetraheme cytochrome CymA targeted by FeGenie HMM; The model is supposed to be highly specific	FeRed/CymA	HMM_FullScore:327	FeGenie
dissimilatory_iron_reduction	MacA	PF03150	Di-haem cytochrome c peroxidase of MacA (gsu0466)	FeRed/PF03150	HMM_FullMode:--cut_tc	FeGenie
dissimilatory_iron_reduction	MacA	PF00034	Cytochrome c domain of MacA (gsu0466)	FeRed/PF00034	HMM_FullMode:--cut_tc	FeGenie
dissimilatory_iron_reduction	MtrCAB	MtrA	periplasmic decaheme cytochrome, MtrA	FeRed/MtrA	HMM_FullScore:140	FeGenie
dissimilatory_iron_reduction	MtrCAB	MtrB_TIGR03509	outer membrane porin protein, MtrB	FeRed/MtrB_TIGR03509	HMM_FullScore:240.05	FeGenie
dissimilatory_iron_reduction	MtrCAB	MtrC_TIGR03507	outer membrane decaheme cytochrome, MtrC	FeRed/MtrC_TIGR03507	HMM_FullScore:209.3	FeGenie
dissimilatory_iron_reduction	OmcF_S_Z	OmcF	outer membrane associated cytochrome OmcF	FeRed/OmcF	HMM_FullScore:83.7	FeGenie
dissimilatory_iron_reduction	OmcF_S_Z	OmcS	outer membrane associated cytochrome OmcS	FeRed/OmcS	HMM_FullScore:78.0	FeGenie
dissimilatory_iron_reduction	OmcF_S_Z	OmcZ	outer membrane associated cytochrome OmcZ	FeRed/OmcZ	HMM_FullScore:76.9	FeGenie
dissimilatory_iron_reduction	porin-cytochrome operons	geobacter_PCCs	bacterial porin-cytochrome gene clusters	FeRed/geobacter_PCCs	Blastp_operon:1e-10	FeGenie
dissimilatory_iron_reduction	S-layer associated protein	TherJR_1122	S-layer-associated proteins	FeRed/TherJR_1122	Blastp:1e-10	FeGenie
dissimilatory_iron_reduction	Flavin_based_EET	Ndh2	NAHD dehdyrogenase	FeRed/Ndh2	HMM_FullScore:40	FeGenie
dissimilatory_iron_reduction	Flavin_based_EET	DmkA	demethylmenaquinone synthesis protein DmkA	FeRed/DmkA	HMM_FullScore:17	FeGenie
dissimilatory_iron_reduction	Flavin_based_EET	DmkB	demethylmenaquinone synthesis protein DmkB	FeRed/DmkB	HMM_FullScore:25	FeGenie
dissimilatory_iron_reduction	Flavin_based_EET	EetA	extracellular electron transfer protein EetA	FeRed/EetA	HMM_FullScore:20	FeGenie
dissimilatory_iron_reduction	Flavin_based_EET	EetB	extracellular electron transfer protein EetB	FeRed/EetB	HMM_FullScore:30	FeGenie
dissimilatory_iron_reduction	Flavin_based_EET	FmnA	membrane bound FMN transferase, FmnA	FeRed/FmnA	HMM_FullScore:60	FeGenie
dissimilatory_iron_reduction	Flavin_based_EET	FmnB	membrane anchored FMN transferase, FmnB	FeRed/FmnB	HMM_FullScore:33	FeGenie
dissimilatory_iron_reduction	Flavin_based_EET	PplA	membrane anchored extracellular electron transfer protein	FeRed/PplA	HMM_FullScore:32	FeGenie
Alcohol_Utilization	Alcohol_Utilization	K19861	BEBT, AMAT; benzyl alcohol O-benzoyltransferase [EC:2.3.1.196 2.3.1.232]	K19861	HMM_DomainScore:443.33	KoFamScan
Alcohol_Utilization	Alcohol_Utilization	K19954	adh1; alcohol dehydrogenase [EC:1.1.1.-]	K19954	HMM_FullScore:422.17	KoFamScan
Alcohol_Utilization	Alcohol_Utilization	K19955	adh2; alcohol dehydrogenase [EC:1.1.1.-]	K19955	HMM_FullScore:462.40	KoFamScan
Alcohol_Utilization	Alcohol_Utilization	K00093	mdh; methanol dehydrogenase [EC:1.1.1.244]	K00093	HMM_FullScore:90	KoFamScan
Alcohol_Utilization	Alcohol_Utilization	K13921	pduQ; 1-propanol dehydrogenase	K13921	HMM_DomainScore:487.53	KoFamScan
Alcohol_Utilization	Alcohol_Utilization	K13953	adhP; alcohol dehydrogenase, propanol-preferring [EC:1.1.1.1]	K13953	HMM_DomainScore:332.20	KoFamScan
Alcohol_Utilization	Alcohol_Utilization	K23259	adh; isopropanol dehydrogenase (NADP+) [EC:1.1.1.80]	K23259	HMM_FullScore:452.03	KoFamScan
Alcohol_Utilization	Alcohol_Utilization	K00005	gldA; glycerol dehydrogenase [EC:1.1.1.6]	K00005	HMM_FullScore:322.17	KoFamScan
Alcohol_Utilization	Alcohol_Utilization	K00100	bdhAB; butanol dehydrogenase [EC:1.1.1.-]	K00100	HMM_FullScore:658.30	KoFamScan
Alcohol_Utilization	Alcohol_Utilization	K08325	yqhD; NADP-dependent alcohol dehydrogenase [EC:1.1.-.-]	K08325	HMM_FullScore:482.47	KoFamScan
Alcohol_Utilization	Alcohol_Utilization	K14028	mdh1, mxaF; methanol dehydrogenase (cytochrome c) subunit 1 [EC:1.1.2.7]	K14028	HMM_FullScore:1048.37	KoFamScan
Alcohol_Utilization	Alcohol_Utilization	K14029	mdh2, mxaI; methanol dehydrogenase (cytochrome c) subunit 2 [EC:1.1.2.7]	K14029	HMM_FullScore:129.30	KoFamScan
Alcohol_Utilization	Alcohol_Utilization	K23995	xoxF; lanthanide-dependent methanol dehydrogenase [EC:1.1.2.10]	K23995	HMM_FullScore:836.63	KoFamScan
Aldehyde_Utilization	Aldehyde_Utilization	K00128	ALDH; aldehyde dehydrogenase (NAD+) [EC:1.2.1.3]	K00128	HMM_FullScore:590.27	KoFamScan
Aldehyde_Utilization	Aldehyde_Utilization	K00129	ALDH3; aldehyde dehydrogenase (NAD(P)+) [EC:1.2.1.5]	K00129	HMM_FullScore:771.93	KoFamScan
Aldehyde_Utilization	Aldehyde_Utilization	K00138	aldB; aldehyde dehydrogenase [EC:1.2.1.-]	K00138	HMM_DomainScore:736.23	KoFamScan
Aldehyde_Utilization	Aldehyde_Utilization	K00148	fdhA; glutathione-independent formaldehyde dehydrogenase [EC:1.2.1.46]	K00148	HMM_FullScore:383.37	KoFamScan
Aldehyde_Utilization	Aldehyde_Utilization	K00149	ALDH9A1; aldehyde dehydrogenase family 9 member A1 [EC:1.2.1.47 1.2.1.3]	K00149	HMM_DomainScore:745.50	KoFamScan
Aldehyde_Utilization	Aldehyde_Utilization	K03738	aor; aldehyde:ferredoxin oxidoreductase [EC:1.2.7.5]	K03738	HMM_FullScore:262.67	KoFamScan
Aldehyde_Utilization	Aldehyde_Utilization	K04021	eutE; aldehyde dehydrogenase	K04021	HMM_FullScore:662.37	KoFamScan
Aldehyde_Utilization	Aldehyde_Utilization	K04072	adhE; acetaldehyde dehydrogenase / alcohol dehydrogenase [EC:1.2.1.10 1.1.1.1]	K04072	HMM_FullScore:644.90	KoFamScan
Aldehyde_Utilization	Aldehyde_Utilization	K04073	mhpF; acetaldehyde dehydrogenase [EC:1.2.1.10]	K04073	HMM_DomainScore:455.10	KoFamScan
Aldehyde_Utilization	Aldehyde_Utilization	K07469	mop; aldehyde oxidoreductase [EC:1.2.99.7]	K07469	HMM_FullScore:939.27	KoFamScan
Aldehyde_Utilization	Aldehyde_Utilization	PF00465	adhE; Aldehyde dehydrogenase family	PF00465	HMM_FullMode:--cut_tc	PFAM
Aldehyde_Utilization	Aldehyde_Utilization	PF00171	aldedh; Aldehyde dehydrogenase family	PF00171	HMM_FullMode:--cut_tc	KoFamScan
Fatty_acids_Utilization	Fatty acids transporter	K06076	fadL; long-chain fatty acid transport protein	K06076	HMM_FullScore:73.07	KoFamScan
Fatty_acids_Utilization	Fatty acids transporter	K02106	atoE; short-chain fatty acids transporter	K02106	HMM_FullScore:159.70	KoFamScan
Fatty_acids_Utilization	Fatty acids transporter	K14393	actP; cation/acetate symporter	K14393	HMM_FullScore:289.00	KoFamScan
Fatty_acids_Utilization	acyl-CoA synthetase	K01895	ACSS1_2, acs; acetyl-CoA synthetase [EC:6.2.1.1]	K01895	HMM_DomainScore:775.43	KoFamScan
Fatty_acids_Utilization	acyl-CoA synthetase	K01896	ACSM; medium-chain acyl-CoA synthetase [EC:6.2.1.2]	K01896	HMM_FullScore:937.93	KoFamScan
Fatty_acids_Utilization	acyl-CoA synthetase	K01897	ACSL, fadD; long-chain acyl-CoA synthetase [EC:6.2.1.3]	K01897	HMM_DomainScore:430.63	KoFamScan
Fatty_acids_Utilization	acyl-CoA synthetase	K01907	AACS, acsA; acetoacetyl-CoA synthetase [EC:6.2.1.16]	K01907	HMM_FullScore:540.10	KoFamScan
Fatty_acids_Utilization	acyl-CoA synthetase	K01908	ACSS3, prpE; propionyl-CoA synthetase [EC:6.2.1.17]	K01908	HMM_DomainScore:785.03	KoFamScan
Fatty_acids_Utilization	acyl-CoA synthetase	K00625	E2.3.1.8, pta; phosphate acetyltransferase [EC:2.3.1.8]	K00625	HMM_DomainScore:380.70	KoFamScan
Fatty_acids_Utilization	acyl-CoA synthetase	K13788	pta; phosphate acetyltransferase [EC:2.3.1.8]	K13788	HMM_FullScore:561.23	KoFamScan
Fatty_acids_Utilization	acyl-CoA synthetase	K15024	K15024; putative phosphotransacetylase [EC:2.3.1.8]	K15024	HMM_FullScore:267.87	KoFamScan
Fatty_acids_Utilization	acyl-CoA synthetase	K00925	ackA; acetate kinase [EC:2.7.2.1]	K00925	HMM_FullScore:192.50	KoFamScan
Fatty_acids_Utilization	acyl-CoA synthetase	K01905	acdA; acetate---CoA ligase (ADP-forming) subunit alpha [EC:6.2.1.13]	K01905	HMM_DomainScore:575.27	KoFamScan
Fatty_acids_Utilization	acyl-CoA synthetase	K22224	acdB; acetate---CoA ligase (ADP-forming) subunit beta [EC:6.2.1.13]	K22224	HMM_DomainScore:325.27	KoFamScan
Fatty_acids_Utilization	acyl-CoA synthetase	K24012	acdAB; acetate---CoA ligase (ADP-forming) [EC:6.2.1.13]	K24012	HMM_DomainScore:655.30	KoFamScan
Fatty_acids_Utilization	acyl-CoA dehydrogenase	K00249	ACADM, acd; acyl-CoA dehydrogenase [EC:1.3.8.7]	K00249	HMM_DomainScore:337.80	KoFamScan
Fatty_acids_Utilization	acyl-CoA dehydrogenase	K00255	ACADL; long-chain-acyl-CoA dehydrogenase [EC:1.3.8.8]	K00255	HMM_FullScore:584.80	KoFamScan
Fatty_acids_Utilization	acyl-CoA dehydrogenase	K06445	fadE; acyl-CoA dehydrogenase [EC:1.3.99.-]	K06445	HMM_FullScore:292.67	KoFamScan
Fatty_acids_Utilization	acyl-CoA dehydrogenase	K09479	ACADVL; very long chain acyl-CoA dehydrogenase [EC:1.3.8.9]	K09479	HMM_FullScore:834.93	KoFamScan
Fatty_acids_Utilization	enoyl-CoA hydratase	K01692	paaF, echA; enoyl-CoA hydratase [EC:4.2.1.17]	K01692	HMM_FullScore:226.40	KoFamScan
Fatty_acids_Utilization	enoyl-CoA hydratase	K07511	ECHS1; enoyl-CoA hydratase [EC:4.2.1.17]	K07511	HMM_FullScore:467.13	KoFamScan
Fatty_acids_Utilization	enoyl-CoA hydratase	K13767	fadB; enoyl-CoA hydratase [EC:4.2.1.17]	K13767	HMM_DomainScore:315.70	KoFamScan
Fatty_acids_Utilization	3-hydroxyacyl-CoA dehydrogenase	K00022	HADH; 3-hydroxyacyl-CoA dehydrogenase [EC:1.1.1.35]	K00022	HMM_DomainScore:354.97	KoFamScan
Fatty_acids_Utilization	3-hydroxyacyl-CoA dehydrogenase	K07516	fadN; 3-hydroxyacyl-CoA dehydrogenase [EC:1.1.1.35]	K07516	HMM_DomainScore:410.27	KoFamScan
Fatty_acids_Utilization	3-hydroxyacyl-CoA dehydrogenase / enoyl-CoA hydratase	K01825	fadB; 3-hydroxyacyl-CoA dehydrogenase / enoyl-CoA hydratase / 3-hydroxybutyryl-CoA epimerase / enoyl-CoA isomerase [EC:1.1.1.35 4.2.1.17 5.1.2.3 5.3.3.8]	K01825	HMM_DomainScore:745.07	KoFamScan
Fatty_acids_Utilization	3-hydroxyacyl-CoA dehydrogenase / enoyl-CoA hydratase	K01782	fadJ; 3-hydroxyacyl-CoA dehydrogenase / enoyl-CoA hydratase / 3-hydroxybutyryl-CoA epimerase [EC:1.1.1.35 4.2.1.17 5.1.2.3]	K01782	HMM_DomainScore:791.57	KoFamScan
Fatty_acids_Utilization	3-hydroxyacyl-CoA dehydrogenase / enoyl-CoA hydratase	K07514	EHHADH; enoyl-CoA hydratase / 3-hydroxyacyl-CoA dehydrogenase / 3,2-trans-enoyl-CoA isomerase [EC:4.2.1.17 1.1.1.35 5.3.3.8]	K07514	HMM_FullScore:927.23	KoFamScan
Fatty_acids_Utilization	3-hydroxyacyl-CoA dehydrogenase / enoyl-CoA hydratase	K07515	HADHA; enoyl-CoA hydratase / long-chain 3-hydroxyacyl-CoA dehydrogenase [EC:4.2.1.17 1.1.1.211]	K07515	HMM_FullScore:870.33	KoFamScan
Fatty_acids_Utilization	3-hydroxyacyl-CoA dehydrogenase / enoyl-CoA hydratase	K10527	MFP2; enoyl-CoA hydratase/3-hydroxyacyl-CoA dehydrogenase [EC:4.2.1.17 1.1.1.35 1.1.1.211]	K10527	HMM_DomainScore:695.60	KoFamScan
Fatty_acids_Utilization	acetyl-CoA acyltransferase	K00632	fadA, fadI; acetyl-CoA acyltransferase [EC:2.3.1.16]	K00632	HMM_DomainScore:504.03	KoFamScan
Fatty_acids_Utilization	acetyl-CoA acyltransferase	K07508	ACAA2; acetyl-CoA acyltransferase 2 [EC:2.3.1.16]	K07508	HMM_FullScore:577.87	KoFamScan
Fatty_acids_Utilization	acetyl-CoA acyltransferase	K07509	HADHB; acetyl-CoA acyltransferase [EC:2.3.1.16]	K07509	HMM_FullScore:536.17	KoFamScan
Fatty_acids_Utilization	acetyl-CoA acyltransferase	K07513	ACAA1; acetyl-CoA acyltransferase 1 [EC:2.3.1.16]	K07513	HMM_DomainScore:544.17	KoFamScan
TRAP_transporter	TRAP_transporter	K21393	yiaN; TRAP-type transport system large permease protein	K21393	HMM_FullScore:493.87	KoFamScan
TRAP_transporter	TRAP_transporter	K21394	yiaM; TRAP-type transport system small permease protein	K21394	HMM_DomainScore:94.90	KoFamScan
TRAP_transporter	TRAP_transporter	K21395	yiaO; TRAP-type transport system periplasmic protein	K21395	HMM_DomainScore:139.63	KoFamScan
TRAP_transporter	TRAP_transporter	K11688	dctP; C4-dicarboxylate-binding protein DctP	K11688	HMM_DomainScore:344.37	KoFamScan
TRAP_transporter	TRAP_transporter	K11689	dctQ; C4-dicarboxylate transporter, DctQ subunit	K11689	HMM_FullScore:138.10	KoFamScan
TRAP_transporter	TRAP_transporter	K11690	dctM; C4-dicarboxylate transporter, DctM subunit	K11690	HMM_DomainScore:248.20	KoFamScan
Formate_utilization	Formate_utilization	K00122	FDH; formate dehydrogenase [EC:1.17.1.9]	K00122	HMM_DomainScore:258.27	KoFamScan
Formate_utilization	Formate_utilization	K00123	fdoG, fdhF, fdwA; formate dehydrogenase major subunit [EC:1.17.1.9]	K00123	HMM_FullScore:814.50	KoFamScan
Formate_utilization	Formate_utilization	K05299	fdhA; formate dehydrogenase (NADP+) alpha subunit [EC:1.17.1.10]	K05299	HMM_FullScore:1254.77	KoFamScan
Formate_utilization	Formate_utilization	K08348	fdnG; formate dehydrogenase-N, alpha subunit [EC:1.17.5.3]	K08348	HMM_DomainScore:1599.13	KoFamScan
Formate_utilization	Formate_utilization	K22516	fdhA; formate dehydrogenase (coenzyme F420) alpha subunit [EC:1.17.98.3 1.8.98.6]	K22516	HMM_FullScore:920.77	KoFamScan
Formate_transporter	Formate_transporter	K21993	fdhC; formate transporter	K21993	HMM_DomainScore:296.77	KoFamScan
Formate_transporter	Formate_transporter	K03459	focB; formate transporter	K03459	HMM_FullScore:509.23	KoFamScan
Formate_transporter	Formate_transporter	K06212	focA; formate transporter	K06212	HMM_FullScore:336.83	KoFamScan
Hydrogenase	FeFeHydrogenase_TIGR02512	FeFeHydrogenase_TIGR02512	FeFeHydrogenase_TIGR02512	FeFeHydrogenase_TIGR02512	HMM_FullMode:--cut_tc	MetabolicHMM
Hydrogenase	FeFeHydrogenase_TIGR04105	FeFeHydrogenase_TIGR04105	FeFeHydrogenase_TIGR04105	FeFeHydrogenase_TIGR04105	HMM_FullMode:--cut_tc	MetabolicHMM
Hydrogenase	Hydrogenase_Group_1	Hydrogenase_Group_1	Hydrogenase_Group_1	Hydrogenase_Group_1	HMM_FullMode:--cut_tc	MetabolicHMM
Hydrogenase	Hydrogenase_Group_2a	Hydrogenase_Group_2a	Hydrogenase_Group_2a	Hydrogenase_Group_2a	HMM_FullMode:--cut_tc	MetabolicHMM
Hydrogenase	Hydrogenase_Group_2b	Hydrogenase_Group_2b	Hydrogenase_Group_2b	Hydrogenase_Group_2b	HMM_FullMode:--cut_tc	MetabolicHMM
Hydrogenase	Hydrogenase_Group_3a	Hydrogenase_Group_3a	Hydrogenase_Group_3a	Hydrogenase_Group_3a	HMM_FullMode:--cut_tc	MetabolicHMM
Hydrogenase	Hydrogenase_Group_3b	Hydrogenase_Group_3b	Hydrogenase_Group_3b	Hydrogenase_Group_3b	HMM_FullMode:--cut_tc	MetabolicHMM
Hydrogenase	Hydrogenase_Group_3c	Hydrogenase_Group_3c	Hydrogenase_Group_3c	Hydrogenase_Group_3c	HMM_FullMode:--cut_tc	MetabolicHMM
Hydrogenase	Hydrogenase_Group_3d	Hydrogenase_Group_3d	Hydrogenase_Group_3d	Hydrogenase_Group_3d	HMM_FullMode:--cut_tc	MetabolicHMM
Hydrogenase	Hydrogenase_Group_4	Hydrogenase_Group_4	Hydrogenase_Group_4	Hydrogenase_Group_4	HMM_FullMode:--cut_tc	MetabolicHMM
Upper_ED_pathway	Upper_ED_pathway	K00036	G6PD, zwf; glucose-6-phosphate 1-dehydrogenase [EC:1.1.1.49 1.1.1.363]	K00036	HMM_FullScore:377.1	KoFamScan
Upper_ED_pathway	Upper_ED_pathway	K01057	PGLS, pgl, devB; 6-phosphogluconolactonase [EC:3.1.1.31]	K01057	HMM_FullScore:116.93	KoFamScan
Upper_ED_pathway	Upper_ED_pathway	K07404	pgl; 6-phosphogluconolactonase [EC:3.1.1.31]	K07404	HMM_DomainScore:125.3	KoFamScan
Upper_ED_pathway	Upper_ED_pathway	K01690	edd; phosphogluconate dehydratase [EC:4.2.1.12]	K01690	HMM_DomainScore:519.07	KoFamScan
Upper_ED_pathway	Upper_ED_pathway	K01625	eda; 2-dehydro-3-deoxyphosphogluconate aldolase / (4S)-4-hydroxy-2-oxoglutarate aldolase [EC:4.1.2.14 4.1.3.42]	K01625	HMM_FullScore:377.1	KoFamScan
Lactate_Utilization	Lactate_Utilization	K00016	LDH, ldh; L-lactate dehydrogenase [EC:1.1.1.27]	K00016	HMM_FullScore:313.57	KoFamScan
Lactate_Utilization	Lactate_Utilization	K00101	lldD; L-lactate dehydrogenase (cytochrome) [EC:1.1.2.3]	K00101	HMM_DomainScore:475.23	KoFamScan
Lactate_Utilization	Lactate_Utilization	K00102	LDHD, dld; D-lactate dehydrogenase (cytochrome) [EC:1.1.2.4]	K00102	HMM_FullScore:505.10	KoFamScan
Lactate_Utilization	Lactate_Utilization	K00427	lldP, lctP; L-lactate permease	K00427	HMM_FullScore:928.90	KoFamScan
Lactate_Utilization	Lactate_Utilization	K00782	lldG; L-lactate dehydrogenase complex protein LldG	K00782	HMM_DomainScore:117.23	KoFamScan
Lactate_Utilization	Lactate_Utilization	K03303	lctP; lactate permease	K03303	HMM_FullScore:97.70	KoFamScan
Lactate_Utilization	Lactate_Utilization	K03777	dld; D-lactate dehydrogenase (quinone) [EC:1.1.5.12]	K03777	HMM_FullScore:627.40	KoFamScan
Lactate_Utilization	Lactate_Utilization	K03778	ldhA; D-lactate dehydrogenase [EC:1.1.1.28]	K03778	HMM_DomainScore:333.70	KoFamScan
Lactate_Utilization	Lactate_Utilization	K05523	hchA; D-lactate dehydratase / protein deglycase [EC:4.2.1.130 3.5.1.124]	K05523	HMM_FullScore:359.40	KoFamScan
Lactate_Utilization	Lactate_Utilization	K08178	JEN; MFS transporter, SHS family, lactate transporter	K08178	HMM_DomainScore:280.13	KoFamScan
Lactate_Utilization	Lactate_Utilization	K18928	lldE; L-lactate dehydrogenase complex protein LldE	K18928	HMM_DomainScore:262.83	KoFamScan
Lactate_Utilization	Lactate_Utilization	K18929	lldF; L-lactate dehydrogenase complex protein LldF	K18929	HMM_FullScore:445.63	KoFamScan
Lactate_Utilization	Lactate_Utilization	K18930	dld; D-lactate dehydrogenase	K18930	HMM_FullScore:482.63	KoFamScan
Lactate_Utilization	Lactate_Utilization	K21836	dld; D-lactate dehydrogenase (acceptor) [EC:1.1.99.6]	K21836	HMM_FullScore:50	KoFamScan
Central Carbon Metabolism	EMP_pathway	K00844	HK; hexokinase [EC:2.7.1.1]	K00844	HMM_DomainScore:102.47	KoFamScan
Central Carbon Metabolism	EMP_pathway	K12407	GCK; glucokinase [EC:2.7.1.2]	K12407	HMM_DomainScore:765.93	KoFamScan
Central Carbon Metabolism	EMP_pathway	K00845	glk; glucokinase [EC:2.7.1.2]	K00845	HMM_FullScore:177.73	KoFamScan
Central Carbon Metabolism	EMP_pathway	K25026	glk; glucokinase [EC:2.7.1.2]	K25026	HMM_FullScore:275.53	KoFamScan
Central Carbon Metabolism	EMP_pathway	K00886	ppgK; polyphosphate glucokinase [EC:2.7.1.63]	K00886	HMM_DomainScore:153.93	KoFamScan
Central Carbon Metabolism	EMP_pathway	K08074	ADPGK; ADP-dependent glucokinase [EC:2.7.1.147]	K08074	HMM_FullScore:255.50	KoFamScan
Central Carbon Metabolism	EMP_pathway	K00918	pfkC; ADP-dependent phosphofructokinase/glucokinase [EC:2.7.1.146 2.7.1.147]	K00918	HMM_FullScore:214.87	KoFamScan
Central Carbon Metabolism	EMP_pathway	K01810	GPI, pgi; glucose-6-phosphate isomerase [EC:5.3.1.9]	K01810	HMM_DomainScore:184.23	KoFamScan
Central Carbon Metabolism	EMP_pathway	K06859	pgi1; glucose-6-phosphate isomerase, archaeal [EC:5.3.1.9]	K06859	HMM_FullScore:106.03	KoFamScan
Central Carbon Metabolism	EMP_pathway	K13810	tal-pgi; transaldolase / glucose-6-phosphate isomerase [EC:2.2.1.2 5.3.1.9]	K13810	HMM_FullScore:684.87	KoFamScan
Central Carbon Metabolism	EMP_pathway	K15916	pgi-pmi; glucose/mannose-6-phosphate isomerase [EC:5.3.1.9 5.3.1.8]	K15916	HMM_FullScore:169.33	KoFamScan
Central Carbon Metabolism	EMP_pathway	K00850	pfkA, PFK; 6-phosphofructokinase 1 [EC:2.7.1.11]	K00850	HMM_FullScore:368.23	KoFamScan
Central Carbon Metabolism	EMP_pathway	K16370	pfkB; 6-phosphofructokinase 2 [EC:2.7.1.11]	K16370	HMM_FullScore:315.07	KoFamScan
Central Carbon Metabolism	EMP_pathway	K21071	pfk, pfp; ATP-dependent phosphofructokinase / diphosphate-dependent phosphofructokinase [EC:2.7.1.11 2.7.1.90]	K21071	HMM_DomainScore:359.60	KoFamScan
Central Carbon Metabolism	EMP_pathway	K00918	pfkC; ADP-dependent phosphofructokinase/glucokinase [EC:2.7.1.146 2.7.1.147]	K00918	HMM_FullScore:214.87	KoFamScan
Central Carbon Metabolism	EMP_pathway	K01623	ALDO; fructose-bisphosphate aldolase, class I [EC:4.1.2.13]	K01623	HMM_FullScore:44.93	KoFamScan
Central Carbon Metabolism	EMP_pathway	K01624	FBA, fbaA; fructose-bisphosphate aldolase, class II [EC:4.1.2.13]	K01624	HMM_FullScore:85.80	KoFamScan
Central Carbon Metabolism	EMP_pathway	K11645	fbaB; fructose-bisphosphate aldolase, class I [EC:4.1.2.13]	K11645	HMM_FullScore:293.83	KoFamScan
Central Carbon Metabolism	EMP_pathway	K16305	K16305; fructose-bisphosphate aldolase / 6-deoxy-5-ketofructose 1-phosphate synthase [EC:4.1.2.13 2.2.1.11]	K16305	HMM_FullScore:497.90	KoFamScan
Central Carbon Metabolism	EMP_pathway	K16306	K16306; fructose-bisphosphate aldolase / 2-amino-3,7-dideoxy-D-threo-hept-6-ulosonate synthase [EC:4.1.2.13 2.2.1.10]	K16306	HMM_FullScore:342.37	KoFamScan
Central Carbon Metabolism	EMP_pathway	K01803	TPI, tpiA; triosephosphate isomerase (TIM) [EC:5.3.1.1]	K01803	HMM_DomainScore:112.80	KoFamScan
Central Carbon Metabolism	EMP_pathway	K00134	GAPDH, gapA; glyceraldehyde 3-phosphate dehydrogenase [EC:1.2.1.12]	K00134	HMM_FullScore:413.73	KoFamScan
Central Carbon Metabolism	EMP_pathway	K00150	gap2; glyceraldehyde-3-phosphate dehydrogenase (NAD(P)) [EC:1.2.1.59]	K00150	HMM_FullScore:279.87	KoFamScan
Central Carbon Metabolism	EMP_pathway	K11389	gapor; glyceraldehyde-3-phosphate dehydrogenase (ferredoxin) [EC:1.2.7.6]	K11389	HMM_FullScore:632.23	KoFamScan
Central Carbon Metabolism	EMP_pathway	K00927	PGK, pgk; phosphoglycerate kinase [EC:2.7.2.3]	K00927	HMM_FullScore:95.40	KoFamScan
Central Carbon Metabolism	EMP_pathway	K01834	PGAM, gpmA; 2,3-bisphosphoglycerate-dependent phosphoglycerate mutase [EC:5.4.2.11]	K01834	HMM_DomainScore:148.67	KoFamScan
Central Carbon Metabolism	EMP_pathway	K15633	gpmI; 2,3-bisphosphoglycerate-independent phosphoglycerate mutase [EC:5.4.2.12]	K15633	HMM_FullScore:74.63	KoFamScan
Central Carbon Metabolism	EMP_pathway	K15634	gpmB; probable phosphoglycerate mutase [EC:5.4.2.12]	K15634	HMM_DomainScore:199.87	KoFamScan
Central Carbon Metabolism	EMP_pathway	K15635	apgM; 2,3-bisphosphoglycerate-independent phosphoglycerate mutase [EC:5.4.2.12]	K15635	HMM_FullScore:109.00	KoFamScan
Central Carbon Metabolism	EMP_pathway	K01689	ENO, eno; enolase [EC:4.2.1.11]	K01689	HMM_FullScore:69.30	KoFamScan
Central Carbon Metabolism	EMP_pathway	K00873	PK, pyk; pyruvate kinase [EC:2.7.1.40]	K00873	HMM_FullScore:55.43	KoFamScan
Central Carbon Metabolism	EMP_pathway	K12406	PKLR; pyruvate kinase isozymes R/L [EC:2.7.1.40]	K12406	HMM_FullScore:1025.97	KoFamScan
Central Carbon Metabolism	TCA_cycle	K01647	CS, gltA; citrate synthase [EC:2.3.3.1]	K01647	HMM_FullScore:355.90	KoFamScan
Central Carbon Metabolism	TCA_cycle	K05942	citrate (Re)-synthase	K05942	HMM_FullScore:338.83	KoFamScan
Central Carbon Metabolism	TCA_cycle	K01681	ACO, acnA; aconitate hydratase [EC:4.2.1.3]	K01681	HMM_FullScore:1301.70	KoFamScan
Central Carbon Metabolism	TCA_cycle	K01682	acnB; aconitate hydratase 2 / 2-methylisocitrate dehydratase [EC:4.2.1.3 4.2.1.99]	K01682	HMM_FullScore:710.43	KoFamScan
Central Carbon Metabolism	TCA_cycle	K00031	IDH1, IDH2, icd; isocitrate dehydrogenase [EC:1.1.1.42]	K00031	HMM_FullScore:183.80	KoFamScan
Central Carbon Metabolism	TCA_cycle	K00030	IDH3; isocitrate dehydrogenase (NAD+) [EC:1.1.1.41]	K00030	HMM_FullScore:458.97	KoFamScan
Central Carbon Metabolism	TCA_cycle	K00164	OGDH, sucA; 2-oxoglutarate dehydrogenase E1 component [EC:1.2.4.2]	K00164	HMM_DomainScore:1219.87	KoFamScan
Central Carbon Metabolism	TCA_cycle	K00658	DLST, sucB; 2-oxoglutarate dehydrogenase E2 component (dihydrolipoamide succinyltransferase) [EC:2.3.1.61]	K00658	HMM_DomainScore:459.77	KoFamScan
Central Carbon Metabolism	TCA_cycle	K01616	kgd; 2-oxoglutarate decarboxylase [EC:4.1.1.71]	K01616	HMM_FullScore:1694.43	KoFamScan
Central Carbon Metabolism	TCA_cycle	K00382	DLD, lpd, pdhD; dihydrolipoamide dehydrogenase [EC:1.8.1.4]	K00382	HMM_FullScore:466.70	KoFamScan
Central Carbon Metabolism	TCA_cycle	K00174	korA, oorA, oforA; 2-oxoglutarate/2-oxoacid ferredoxin oxidoreductase subunit alpha [EC:1.2.7.3 1.2.7.11]	K00174	HMM_FullScore:252.47	KoFamScan
Central Carbon Metabolism	TCA_cycle	K00175	korB, oorB, oforB; 2-oxoglutarate/2-oxoacid ferredoxin oxidoreductase subunit beta [EC:1.2.7.3 1.2.7.11]	K00175	HMM_DomainScore:243.30	KoFamScan
Central Carbon Metabolism	TCA_cycle	K00177	korC, oorC; 2-oxoglutarate ferredoxin oxidoreductase subunit gamma [EC:1.2.7.3]	K00177	HMM_FullScore:151.03	KoFamScan
Central Carbon Metabolism	TCA_cycle	K00176	korD, oorD; 2-oxoglutarate ferredoxin oxidoreductase subunit delta [EC:1.2.7.3]	K00176	HMM_DomainScore:69.87	KoFamScan
Central Carbon Metabolism	TCA_cycle	K01902	sucD; succinyl-CoA synthetase alpha subunit [EC:6.2.1.5]	K01902	HMM_DomainScore:367.37	KoFamScan
Central Carbon Metabolism	TCA_cycle	K01903	sucC; succinyl-CoA synthetase beta subunit [EC:6.2.1.5]	K01903	HMM_DomainScore:503.57	KoFamScan
Central Carbon Metabolism	TCA_cycle	K01899	LSC1; succinyl-CoA synthetase alpha subunit [EC:6.2.1.4 6.2.1.5]	K01899	HMM_FullScore:555.47	KoFamScan
Central Carbon Metabolism	TCA_cycle	K01900	LSC2; succinyl-CoA synthetase beta subunit [EC:6.2.1.4 6.2.1.5]	K01900	HMM_FullScore:574.67	KoFamScan
Central Carbon Metabolism	TCA_cycle	K18118	aarC, cat1; succinyl-CoA:acetate CoA-transferase [EC:2.8.3.18]	K18118	HMM_FullScore:681.97	KoFamScan
Central Carbon Metabolism	TCA_cycle	K00234	SDHA, SDH1; succinate dehydrogenase (ubiquinone) flavoprotein subunit [EC:1.3.5.1]	K00234	HMM_FullScore:1183.07	KoFamScan
Central Carbon Metabolism	TCA_cycle	K00235	SDHB, SDH2; succinate dehydrogenase (ubiquinone) iron-sulfur subunit [EC:1.3.5.1]	K00235	HMM_FullScore:474.60	KoFamScan
Central Carbon Metabolism	TCA_cycle	K00236	SDHC, SDH3; succinate dehydrogenase (ubiquinone) cytochrome b560 subunit	K00236	HMM_DomainScore:132.17	KoFamScan
Central Carbon Metabolism	TCA_cycle	K00237	SDHD, SDH4; succinate dehydrogenase (ubiquinone) membrane anchor subunit	K00237	HMM_DomainScore:83.73	KoFamScan
Central Carbon Metabolism	TCA_cycle	K00239	sdhA, frdA; succinate dehydrogenase / fumarate reductase, flavoprotein subunit [EC:1.3.5.1 1.3.5.4]	K00239	HMM_DomainScore:690.20	KoFamScan
Central Carbon Metabolism	TCA_cycle	K00240	sdhB, frdB; succinate dehydrogenase / fumarate reductase, iron-sulfur subunit [EC:1.3.5.1 1.3.5.4]	K00240	HMM_DomainScore:103.30	KoFamScan
Central Carbon Metabolism	TCA_cycle	K00241	sdhC, frdC; succinate dehydrogenase / fumarate reductase, cytochrome b subunit	K00241	HMM_DomainScore:54.17	KoFamScan
Central Carbon Metabolism	TCA_cycle	K00242	sdhD, frdD; succinate dehydrogenase / fumarate reductase, membrane anchor subunit	K00242	HMM_DomainScore:62.50	KoFamScan
Central Carbon Metabolism	TCA_cycle	K18859	sdhD, frdD; succinate dehydrogenase / fumarate reductase, subunit D	K18859	HMM_FullScore:155.80	KoFamScan
Central Carbon Metabolism	TCA_cycle	K18860	sdhD, frdD; putative succinate dehydrogenase / fumarate reductase, subunit D	K18860	HMM_FullScore:127.53	KoFamScan
Central Carbon Metabolism	TCA_cycle	K00244	frdA; fumarate reductase flavoprotein subunit [EC:1.3.5.4]	K00244	HMM_DomainScore:365.50	KoFamScan
Central Carbon Metabolism	TCA_cycle	K00245	frdB; fumarate reductase iron-sulfur subunit [EC:1.3.5.4]	K00245	HMM_DomainScore:279.30	KoFamScan
Central Carbon Metabolism	TCA_cycle	K00246	frdC; fumarate reductase subunit C	K00246	HMM_DomainScore:53.70	KoFamScan
Central Carbon Metabolism	TCA_cycle	K00247	frdD; fumarate reductase subunit D	K00247	HMM_FullScore:36.67	KoFamScan
Central Carbon Metabolism	TCA_cycle	K01676	E4.2.1.2A, fumA, fumB; fumarate hydratase, class I [EC:4.2.1.2]	K01676	HMM_FullScore:351.63	KoFamScan
Central Carbon Metabolism	TCA_cycle	K01679	E4.2.1.2B, fumC; fumarate hydratase, class II [EC:4.2.1.2]	K01679	HMM_FullScore:642.30	KoFamScan
Central Carbon Metabolism	TCA_cycle	K01677	E4.2.1.2AA, fumA; fumarate hydratase subunit alpha [EC:4.2.1.2]	K01677	HMM_DomainScore:301.07	KoFamScan
Central Carbon Metabolism	TCA_cycle	K01678	E4.2.1.2AB, fumB; fumarate hydratase subunit beta [EC:4.2.1.2]	K01678	HMM_DomainScore:220.17	KoFamScan
Central Carbon Metabolism	TCA_cycle	K00026	MDH2; malate dehydrogenase [EC:1.1.1.37]	K00026	HMM_FullScore:501.90	KoFamScan
Central Carbon Metabolism	TCA_cycle	K00025	MDH1; malate dehydrogenase [EC:1.1.1.37]	K00025	HMM_FullScore:550.20	KoFamScan
Central Carbon Metabolism	TCA_cycle	K00024	mdh; malate dehydrogenase [EC:1.1.1.37]	K00024	HMM_DomainScore:331.37	KoFamScan
Central Carbon Metabolism	TCA_cycle	K00116	mqo; malate dehydrogenase (quinone) [EC:1.1.5.4]	K00116	HMM_FullScore:161.30	KoFamScan
Photosystem	proteorhodopsin	proteorhodopsin	light-activated retinal-containing proton pump	proteorhodopsin	HMM_FullScore: 30	MicRhoDE
Photosystem	Photosystem_I	K02689	psaA; photosystem I P700 chlorophyll a apoprotein A1	K02689	HMM_FullScore:951.03	KoFamScan
Photosystem	Photosystem_I	K02690	psaB; photosystem I P700 chlorophyll a apoprotein A2	K02690	HMM_DomainScore:1058.07	KoFamScan
Photosystem	Photosystem_I	K02691	psaC; photosystem I subunit VII	K02691	HMM_DomainScore:127.47	KoFamScan
Photosystem	Photosystem_I	K02692	psaD; photosystem I subunit II	K02692	HMM_FullScore:127.73	KoFamScan
Photosystem	Photosystem_I	K02693	psaE; photosystem I subunit IV	K02693	HMM_FullScore:65.77	KoFamScan
Photosystem	Photosystem_I	K02694	psaF; photosystem I subunit III	K02694	HMM_FullScore:83.27	KoFamScan
Photosystem	Photosystem_I	K02696	psaI; photosystem I subunit VIII	K02696	HMM_DomainScore:34.50	KoFamScan
Photosystem	Photosystem_I	K02697	psaJ; photosystem I subunit IX	K02697	HMM_DomainScore:30.67	KoFamScan
Photosystem	Photosystem_I	K02698	psaK; photosystem I subunit X	K02698	HMM_FullScore:45.50	KoFamScan
Photosystem	Photosystem_I	K02699	psaL; photosystem I subunit XI	K02699	HMM_DomainScore:187.87	KoFamScan
Photosystem	Photosystem_I	K02700	psaM; photosystem I subunit XII	K02700	HMM_FullScore:36.23	KoFamScan
Photosystem	Photosystem_I	K08905	psaG; photosystem I subunit V	K08905	HMM_FullScore:116.80	KoFamScan
Photosystem	Photosystem_I	K02695	psaH; photosystem I subunit VI	K02695	HMM_FullScore:128.90	KoFamScan
Photosystem	Photosystem_I	K02701	psaN; photosystem I subunit PsaN	K02701	HMM_FullScore:131.33	KoFamScan
Photosystem	Photosystem_I	K14332	psaO; photosystem I subunit PsaO	K14332	HMM_FullScore:116.50	KoFamScan
Photosystem	Photosystem_I	K02702	psaX; photosystem I 4.8kDa protein	K02702	HMM_FullScore:41.90	KoFamScan
Cytochrome_b6_f_complex	Cytochrome_b6_f_complex	petB	petB; cytochrome b6	K02635	HMM_FullScore:297.57	KoFamScan
Cytochrome_b6_f_complex	Cytochrome_b6_f_complex	petD	petD; cytochrome b6-f complex subunit 4	K02637	HMM_FullScore:144.73	KoFamScan
Cytochrome_b6_f_complex	Cytochrome_b6_f_complex	petA	petA; apocytochrome f	K02634	HMM_FullScore:207.97	KoFamScan
Cytochrome_b6_f_complex	Cytochrome_b6_f_complex	petC	petC; cytochrome b6-f complex iron-sulfur subunit [EC:1.10.9.1]	K02636	HMM_FullScore:109.60	KoFamScan
Cytochrome_b6_f_complex	Cytochrome_b6_f_complex	petL	petL; cytochrome b6-f complex subunit 6	K02642	HMM_FullScore:31.13	KoFamScan
Cytochrome_b6_f_complex	Cytochrome_b6_f_complex	petM	petM; cytochrome b6-f complex subunit 7	K02643	HMM_FullScore:35.63	KoFamScan
Cytochrome_b6_f_complex	Cytochrome_b6_f_complex	petN	petN; cytochrome b6-f complex subunit 8	K03689	HMM_DomainScore:31.50	KoFamScan
Cytochrome_b6_f_complex	Cytochrome_b6_f_complex	petG	petG; cytochrome b6-f complex subunit 5	K02640	HMM_FullScore:58.07	KoFamScan
Anoxygenic_photosynthesis	Anoxygenic_photosynthesis_II	pufM	pufM; photosynthetic reaction center M subunit	K08929	HMM_DomainScore:428.23	KoFamScan
Anoxygenic_photosynthesis	Anoxygenic_photosynthesis_II	pufL	pufL; photosynthetic reaction center L subunit	K08928	HMM_DomainScore:387.10	KoFamScan
Anoxygenic_photosynthesis	Anoxygenic_photosynthesis_I	pscA	pscA; photosystem P840 reaction center large subunit	K08940	HMM_FullScore:1014.30	KoFamScan
Anoxygenic_photosynthesis	Anoxygenic_photosynthesis_I	pscB	pscB; photosystem P840 reaction center iron-sulfur protein	K08941	HMM_FullScore:194.87	KoFamScan
Anoxygenic_photosynthesis	Anoxygenic_photosynthesis_I	pscC	pscC; photosystem P840 reaction center cytochrome c551	K08942	HMM_FullScore:234.87	KoFamScan
Anoxygenic_photosynthesis	Anoxygenic_photosynthesis_I	pscD	pscD; photosystem P840 reaction center protein PscD	K08943	HMM_FullScore:185.30	KoFamScan
Retinal_biosynthesis	Retinal_biosynthesis	crtY	lcyB, crtL1, crtY; lycopene beta-cyclase [EC:5.5.1.19]	K06443	HMM_FullScore:118.87	KoFamScan
Retinal_biosynthesis	Retinal_biosynthesis	crtB	crtB; 15-cis-phytoene/all-trans-phytoene synthase [EC:2.5.1.32 2.5.1.99]	K02291	HMM_DomainScore:167.47	KoFamScan
Retinal_biosynthesis	Retinal_biosynthesis	crtI	crtI; phytoene desaturase [EC:1.3.99.26 1.3.99.28 1.3.99.29 1.3.99.31]	K10027	HMM_DomainScore:518.93	KoFamScan
Retinal_biosynthesis	Retinal_biosynthesis	GGPS	GGPS; geranylgeranyl diphosphate synthase, type II [EC:2.5.1.1 2.5.1.10 2.5.1.29]	K13789	HMM_FullScore:360.00	KoFamScan
Retinal_biosynthesis	Retinal_biosynthesis	diox1	diox1; all-trans-8'-apo-beta-carotenal 15,15'-oxygenase [EC:1.13.11.75]	K00464	HMM_DomainScore:405.83	KoFamScan
Photosystem	Photosystem_II	psbA	psbA; photosystem II P680 reaction center D1 protein [EC:1.10.3.9]	K02703	HMM_FullScore:268.27	KoFamScan
Photosystem	Photosystem_II	psbD	psbD; photosystem II P680 reaction center D2 protein [EC:1.10.3.9]	K02706	HMM_FullScore:352.03	KoFamScan
Photosystem	Photosystem_II	psbC	psbC; photosystem II CP43 chlorophyll apoprotein	K02705	HMM_DomainScore:330.73	KoFamScan
Photosystem	Photosystem_II	psbB	psbB; photosystem II CP47 chlorophyll apoprotein	K02704	HMM_FullScore:290.27	KoFamScan
Photosystem	Photosystem_II	psbE	psbE; photosystem II cytochrome b559 subunit alpha	K02707	HMM_FullScore:79.77	KoFamScan
Photosystem	Photosystem_II	psbF	psbF; photosystem II cytochrome b559 subunit beta	K02708	HMM_FullScore:64.83	KoFamScan
N_metabolism	Nitrate_reduction	narG	narG, narZ, nxrA; nitrate reductase / nitrite oxidoreductase, alpha subunit [EC:1.7.5.1 1.7.99.-]	K00370	HMM_FullScore:826.80	KoFamScan
N_metabolism	Nitrate_reduction	narH	narH, narY, nxrB; nitrate reductase / nitrite oxidoreductase, beta subunit [EC:1.7.5.1 1.7.99.-]	K00371	HMM_DomainScore:250.77	KoFamScan
N_metabolism	Nitrate_reduction	napA	napA; periplasmic nitrate reductase NapA [EC:1.7.99.-]	K02567	HMM_FullScore:806.87	KoFamScan
N_metabolism	Nitrate_reduction	napB	napB; cytochrome c-type protein NapB	K02568	HMM_DomainScore:27.30	KoFamScan
N_metabolism	DNRA	nirB	nirB; nitrite reductase (NADH) large subunit [EC:1.7.1.15]	K00362	HMM_FullScore:539.87	KoFamScan
N_metabolism	DNRA	nirD	nirD; nitrite reductase (NADH) small subunit [EC:1.7.1.15]	K00363	HMM_DomainScore:101.03	KoFamScan
N_metabolism	DNRA	nrfA	nrfA; nitrite reductase (cytochrome c-552) [EC:1.7.2.2]	K03385	HMM_FullScore:168.80	KoFamScan
N_metabolism	DNRA	nrfH	nrfH; cytochrome c nitrite reductase small subunit	K15876	HMM_FullScore:121.00	KoFamScan
N_metabolism	Nitrite_reduction	nirK	nirK; nitrite reductase (NO-forming) [EC:1.7.2.1]	K00368	HMM_FullScore:217.77	KoFamScan
N_metabolism	Nitrite_reduction	nirS	nirS; nitrite reductase (NO-forming) / hydroxylamine reductase [EC:1.7.2.1 1.7.99.1]	K15864	HMM_FullScore:413.67	KoFamScan
N_metabolism	Nitrite_reduction	norB	norB; nitric oxide reductase subunit B [EC:1.7.2.5]	K04561	HMM_FullScore:122.07	KoFamScan
N_metabolism	Nitrite_reduction	norC	norC; nitric oxide reductase subunit C	K02305	HMM_DomainScore:70.50	KoFamScan
N_metabolism	Nitrite_reduction	nosZ	nosZ; nitrous-oxide reductase [EC:1.7.2.4]	K00376	HMM_FullScore:515.93	KoFamScan
N_metabolism	Nitrogen_fixation	nifD	nifD; nitrogenase molybdenum-iron protein alpha chain [EC:1.18.6.1]	K02586	HMM_FullScore:532.27	KoFamScan
N_metabolism	Nitrogen_fixation	nifK	nifK; nitrogenase molybdenum-iron protein beta chain [EC:1.18.6.1]	K02591	HMM_FullScore:494.60	KoFamScan
N_metabolism	Nitrogen_fixation	nifH	nifH; nitrogenase iron protein NifH [EC:1.18.6.1]	K02588	HMM_FullScore:374.87	KoFamScan
N_metabolism	amonium_oxidation	hao	hao; hydroxylamine dehydrogenase [EC:1.7.2.6]	K10535	HMM_FullScore:240.90	KoFamScan
N_metabolism	amonium_oxidation	pmoA	pmoA-amoA; methane/ammonia monooxygenase subunit A [EC:1.14.18.3 1.14.99.39]	K10944	HMM_FullScore:155.30	KoFamScan
N_metabolism	amonium_oxidation	pmoB	pmoB-amoB; methane/ammonia monooxygenase subunit B	K10945	HMM_FullScore:156.27	KoFamScan
N_metabolism	amonium_oxidation	pmoC	pmoC-amoC; methane/ammonia monooxygenase subunit C	K10946	HMM_FullScore:141.57	KoFamScan
ATPase	ATPase	K02111	ATPF1A, atpA; F-type H+-transporting ATPase subunit alpha [EC:3.6.3.14]	K02111	HMM_DomainScore:424.63	KoFamScan
ATPase	ATPase	K02112	ATPF1B, atpD; F-type H+-transporting ATPase subunit beta [EC:3.6.3.14]	K02112	HMM_DomainScore:484.67	KoFamScan
ATPase	ATPase	K02115	ATPF1G, atpG; F-type H+-transporting ATPase subunit gamma	K02115	HMM_FullScore:251.33	KoFamScan
ATPase	ATPase	K02113	ATPF1D, atpH; F-type H+-transporting ATPase subunit delta	K02113	HMM_DomainScore:69.77	KoFamScan
ATPase	ATPase	K02114	ATPF1E, atpC; F-type H+-transporting ATPase subunit epsilon	K02114	HMM_DomainScore:93.23	KoFamScan
ATPase	ATPase	K02108	ATPF0A, atpB; F-type H+-transporting ATPase subunit a	K02108	HMM_FullScore:156.40	KoFamScan
ATPase	ATPase	K02109	ATPF0B, atpF; F-type H+-transporting ATPase subunit b	K02109	HMM_DomainScore:42.67	KoFamScan
ATPase	ATPase	K02110	ATPF0C, atpE; F-type H+-transporting ATPase subunit c	K02110	HMM_DomainScore:65.80	KoFamScan
ATPase	ATPase	K02117	ATPVA, ntpA, atpA; V/A-type H+/Na+-transporting ATPase subunit A [EC:3.6.3.14 3.6.3.15]	K02117	HMM_DomainScore:814.90	KoFamScan
ATPase	ATPase	K02118	ATPVB, ntpB, atpB; V/A-type H+/Na+-transporting ATPase subunit B	K02118	HMM_DomainScore:701.93	KoFamScan
ATPase	ATPase	K02119	ATPVC, ntpC, atpC; V/A-type H+/Na+-transporting ATPase subunit C	K02119	HMM_FullScore:118.83	KoFamScan
ATPase	ATPase	K02120	ATPVD, ntpD, atpD; V/A-type H+/Na+-transporting ATPase subunit D	K02120	HMM_FullScore:163.77	KoFamScan
ATPase	ATPase	K02121	ATPVE, ntpE, atpE; V/A-type H+/Na+-transporting ATPase subunit E	K02121	HMM_DomainScore:95.80	KoFamScan
ATPase	ATPase	K02122	ATPVF, ntpF, atpF; V/A-type H+/Na+-transporting ATPase subunit F	K02122	HMM_DomainScore:59.83	KoFamScan
ATPase	ATPase	K02107	ATPVG, ahaH, atpH; V/A-type H+/Na+-transporting ATPase subunit G/H	K02107	HMM_DomainScore:40.23	KoFamScan
ATPase	ATPase	K02123	ATPVI, ntpI, atpI; V/A-type H+/Na+-transporting ATPase subunit I	K02123	HMM_FullScore:308.07	KoFamScan
ATPase	ATPase	K02124	ATPVK, ntpK, atpK; V/A-type H+/Na+-transporting ATPase subunit K	K02124	HMM_DomainScore:65.53	KoFamScan
NADH_dehydrogenase	NADH_dehydrogenase	K00330	nuoA; NADH-quinone oxidoreductase subunit A [EC:1.6.5.3]	K00330	HMM_DomainScore:127.03	KoFamScan
NADH_dehydrogenase	NADH_dehydrogenase	K00331	nuoB; NADH-quinone oxidoreductase subunit B [EC:1.6.5.3]	K00331	HMM_DomainScore:269.10	KoFamScan
NADH_dehydrogenase	NADH_dehydrogenase	K00332	nuoC; NADH-quinone oxidoreductase subunit C [EC:1.6.5.3]	K00332	HMM_FullScore:198.43	KoFamScan
NADH_dehydrogenase	NADH_dehydrogenase	K00333	nuoD; NADH-quinone oxidoreductase subunit D [EC:1.6.5.3]	K00333	HMM_DomainScore:512.70	KoFamScan
NADH_dehydrogenase	NADH_dehydrogenase	K00334	nuoE; NADH-quinone oxidoreductase subunit E [EC:1.6.5.3]	K00334	HMM_DomainScore:156.90	KoFamScan
NADH_dehydrogenase	NADH_dehydrogenase	K00335	nuoF; NADH-quinone oxidoreductase subunit F [EC:1.6.5.3]	K00335	HMM_FullScore:613.40	KoFamScan
NADH_dehydrogenase	NADH_dehydrogenase	K00336	nuoG; NADH-quinone oxidoreductase subunit G [EC:1.6.5.3]	K00336	HMM_DomainScore:691.30	KoFamScan
NADH_dehydrogenase	NADH_dehydrogenase	K00337	nuoH; NADH-quinone oxidoreductase subunit H [EC:1.6.5.3]	K00337	HMM_DomainScore:433.33	KoFamScan
NADH_dehydrogenase	NADH_dehydrogenase	K00338	nuoI; NADH-quinone oxidoreductase subunit I [EC:1.6.5.3]	K00338	HMM_DomainScore:147.03	KoFamScan
NADH_dehydrogenase	NADH_dehydrogenase	K00339	nuoJ; NADH-quinone oxidoreductase subunit J [EC:1.6.5.3]	K00339	HMM_FullScore:124.13	KoFamScan
NADH_dehydrogenase	NADH_dehydrogenase	K00340	nuoK; NADH-quinone oxidoreductase subunit K [EC:1.6.5.3]	K00340	HMM_FullScore:96.80	KoFamScan
NADH_dehydrogenase	NADH_dehydrogenase	K00341	nuoL; NADH-quinone oxidoreductase subunit L [EC:1.6.5.3]	K00341	HMM_FullScore:550.90	KoFamScan
NADH_dehydrogenase	NADH_dehydrogenase	K00342	nuoM; NADH-quinone oxidoreductase subunit M [EC:1.6.5.3]	K00342	HMM_FullScore:552.33	KoFamScan
NADH_dehydrogenase	NADH_dehydrogenase	K00343	nuoN; NADH-quinone oxidoreductase subunit N [EC:1.6.5.3]	K00343	HMM_DomainScore:329.70	KoFamScan
NADH_dehydrogenase	NADH_dehydrogenase	K05574	ndhC; NAD(P)H-quinone oxidoreductase subunit 3 [EC:1.6.5.3]	K05574	HMM_DomainScore:165.87	KoFamScan
NADH_dehydrogenase	NADH_dehydrogenase	K05582	ndhK; NAD(P)H-quinone oxidoreductase subunit K [EC:1.6.5.3]	K05582	HMM_DomainScore:306.53	KoFamScan
NADH_dehydrogenase	NADH_dehydrogenase	K05581	ndhJ; NAD(P)H-quinone oxidoreductase subunit J [EC:1.6.5.3]	K05581	HMM_FullScore:224.70	KoFamScan
NADH_dehydrogenase	NADH_dehydrogenase	K05579	ndhH; NAD(P)H-quinone oxidoreductase subunit H [EC:1.6.5.3]	K05579	HMM_FullScore:605.83	KoFamScan
NADH_dehydrogenase	NADH_dehydrogenase	K05572	ndhA; NAD(P)H-quinone oxidoreductase subunit 1 [EC:1.6.5.3]	K05572	HMM_FullScore:359.43	KoFamScan
NADH_dehydrogenase	NADH_dehydrogenase	K05580	ndhI; NAD(P)H-quinone oxidoreductase subunit I [EC:1.6.5.3]	K05580	HMM_DomainScore:177.13	KoFamScan
NADH_dehydrogenase	NADH_dehydrogenase	K05578	ndhG; NAD(P)H-quinone oxidoreductase subunit 6 [EC:1.6.5.3]	K05578	HMM_FullScore:172.50	KoFamScan
NADH_dehydrogenase	NADH_dehydrogenase	K05576	ndhE; NAD(P)H-quinone oxidoreductase subunit 4L [EC:1.6.5.3]	K05576	HMM_DomainScore:134.33	KoFamScan
NADH_dehydrogenase	NADH_dehydrogenase	K05577	ndhF; NAD(P)H-quinone oxidoreductase subunit 5 [EC:1.6.5.3]	K05577	HMM_FullScore:460.27	KoFamScan
NADH_dehydrogenase	NADH_dehydrogenase	K05575	ndhD; NAD(P)H-quinone oxidoreductase subunit 4 [EC:1.6.5.3]	K05575	HMM_FullScore:578.87	KoFamScan
NADH_dehydrogenase	NADH_dehydrogenase	K05573	ndhB; NAD(P)H-quinone oxidoreductase subunit 2 [EC:1.6.5.3]	K05573	HMM_FullScore:526.93	KoFamScan
NADH_dehydrogenase	NADH_dehydrogenase	K05583	ndhL; NAD(P)H-quinone oxidoreductase subunit L [EC:1.6.5.3]	K05583	HMM_FullScore:63.63	KoFamScan
NADH_dehydrogenase	NADH_dehydrogenase	K05584	ndhM; NAD(P)H-quinone oxidoreductase subunit M [EC:1.6.5.3]	K05584	HMM_FullScore:169.90	KoFamScan
NADH_dehydrogenase	NADH_dehydrogenase	K05585	ndhN; NAD(P)H-quinone oxidoreductase subunit N [EC:1.6.5.3]	K05585	HMM_FullScore:186.70	KoFamScan
Terminal_oxidase	ccoNOQP	K00404	ccoN; cytochrome c oxidase cbb3-type subunit I [EC:1.9.3.1]	K00404	HMM_FullScore:668.90	KoFamScan
Terminal_oxidase	ccoNOQP	K00405	ccoO; cytochrome c oxidase cbb3-type subunit II	K00405	HMM_DomainScore:282.00	KoFamScan
Terminal_oxidase	ccoNOQP	K00407	ccoQ; cytochrome c oxidase cbb3-type subunit IV	K00407	HMM_DomainScore:23.97	KoFamScan
Terminal_oxidase	ccoNOQP	K00406	ccoP; cytochrome c oxidase cbb3-type subunit III	K00406	HMM_DomainScore:101.07	KoFamScan
Terminal_oxidase	cydAB	K00425	cydA; cytochrome d ubiquinol oxidase subunit I [EC:1.10.3.14]	K00425	HMM_FullScore:70.87	KoFamScan
Terminal_oxidase	cydAB	K00426	cydB; cytochrome d ubiquinol oxidase subunit II [EC:1.10.3.14]	K00426	HMM_FullScore:38.83	KoFamScan
Terminal_oxidase	cyoABCD	K02300	cyoD; cytochrome o ubiquinol oxidase subunit IV	K02300	HMM_FullScore:77.33	KoFamScan
Terminal_oxidase	cyoABCD	K02299	cyoC; cytochrome o ubiquinol oxidase subunit III	K02299	HMM_FullScore:265.07	KoFamScan
Terminal_oxidase	cyoABCD	K02298	cyoB; cytochrome o ubiquinol oxidase subunit I [EC:1.10.3.10]	K02298	HMM_FullScore:972.57	KoFamScan
Terminal_oxidase	cyoABCD	K02297	cyoA; cytochrome o ubiquinol oxidase subunit II [EC:1.10.3.10]	K02297	HMM_FullScore:318.53	KoFamScan
Terminal_oxidase	coxABCD	K02277	coxD, ctaF; cytochrome c oxidase subunit IV [EC:1.9.3.1]	K02277	HMM_FullScore:45.63	KoFamScan
Terminal_oxidase	coxABCD	K02276	coxC; cytochrome c oxidase subunit III [EC:1.9.3.1]	K02276	HMM_DomainScore:180.40	KoFamScan
Terminal_oxidase	coxABCD	K02274	coxA; cytochrome c oxidase subunit I [EC:1.9.3.1]	K02274	HMM_DomainScore:761.57	KoFamScan
Terminal_oxidase	coxABCD	K02275	coxB; cytochrome c oxidase subunit II [EC:1.9.3.1]	K02275	HMM_FullScore:209.10	KoFamScan
Terminal_oxidase	qoxABCD	K02829	qoxD; cytochrome aa3-600 menaquinol oxidase subunit IV [EC:1.10.3.12]	K02829	HMM_FullScore:92.53	KoFamScan
Terminal_oxidase	qoxABCD	K02828	qoxC; cytochrome aa3-600 menaquinol oxidase subunit III [EC:1.10.3.12]	K02828	HMM_FullScore:280.10	KoFamScan
Terminal_oxidase	qoxABCD	K02827	qoxB; cytochrome aa3-600 menaquinol oxidase subunit I [EC:1.10.3.12]	K02827	HMM_FullScore:1054.90	KoFamScan
Terminal_oxidase	qoxABCD	K02826	qoxA; cytochrome aa3-600 menaquinol oxidase subunit II [EC:1.10.3.12]	K02826	HMM_FullScore:379.47	KoFamScan
ubiquinol_cytochrome_c_reduction	ubiquinol_cytochrome_c_reduction	K00411	UQCRFS1, RIP1, petA; ubiquinol-cytochrome c reductase iron-sulfur subunit [EC:1.10.2.2]	K00411	HMM_FullScore:83.37	KoFamScan
ubiquinol_cytochrome_c_reduction	ubiquinol_cytochrome_c_reduction	K00410	fbcH; ubiquinol-cytochrome c reductase cytochrome b/c1 subunit	K00410	HMM_DomainScore:712.53	KoFamScan
Carbon_fixation	rTCA_ATP_citrate_lyase	K15230	aclA; ATP-citrate lyase alpha-subunit [EC:2.3.3.8]	K15230	HMM_FullScore:920.17	KoFamScan
Carbon_fixation	rTCA_ATP_citrate_lyase	K15231	aclB; ATP-citrate lyase beta-subunit [EC:2.3.3.8]	K15231	HMM_FullScore:511.30	KoFamScan
Carbon_fixation	rTCA_citryl_CoA_synthetase	K15232	ccsA; citryl-CoA synthetase large subunit [EC:6.2.1.18]	K15232	HMM_FullScore:643.90	KoFamScan
Carbon_fixation	rTCA_citryl_CoA_synthetase	K15233	ccsB; citryl-CoA synthetase small subunit	K15233	HMM_FullScore:691.50	KoFamScan
Carbon_fixation	rTCA_citryl_CoA_synthetase	K15234	ccl; citryl-CoA lyase [EC:4.1.3.34]	K15234	HMM_FullScore:299.90	KoFamScan
Carbon_fixation	WL_pathway	K00198	cooS, acsA; anaerobic carbon-monoxide dehydrogenase catalytic subunit [EC:1.2.7.4]	K00198	HMM_FullScore:449.63	KoFamScan
Carbon_fixation	WL_pathway	K05299	fdhA; formate dehydrogenase (NADP+) alpha subunit [EC:1.17.1.10]	K05299	HMM_FullScore:1254.77	KoFamScan
Carbon_fixation	WL_pathway	K15022	fdhB; formate dehydrogenase (NADP+) beta subunit [EC:1.17.1.10]	K15022	HMM_DomainScore:652.37	KoFamScan
Carbon_fixation	WL_pathway	K22015	fdhF; formate dehydrogenase (acceptor) [EC:1.17.99.7]	K22015	HMM_FullScore:882.27	KoFamScan
Carbon_fixation	WL_pathway	K25123	hydA2; iron hydrogenase HydA2 [EC:1.12.7.-]	K25123	HMM_FullScore:625.80	KoFamScan
Carbon_fixation	WL_pathway	K25124	hycB; FeS-containing electron transfer protein	K25124	HMM_FullScore:209.73	KoFamScan
Carbon_fixation	WL_pathway	K01938	fhs; formate--tetrahydrofolate ligase [EC:6.3.4.3]	K01938	HMM_DomainScore:881.67	KoFamScan
Carbon_fixation	WL_pathway	K01491	folD; methylenetetrahydrofolate dehydrogenase (NADP+) / methenyltetrahydrofolate cyclohydrolase [EC:1.5.1.5 3.5.4.9]	K01491	HMM_DomainScore:399.90	KoFamScan
Carbon_fixation	WL_pathway	K01500	fchA; methenyltetrahydrofolate cyclohydrolase [EC:3.5.4.9]	K01500	HMM_DomainScore:202.83	KoFamScan
Carbon_fixation	WL_pathway	K00297	metF, MTHFR; methylenetetrahydrofolate reductase (NADPH) [EC:1.5.1.20]	K00297	HMM_DomainScore:196.60	KoFamScan
Carbon_fixation	WL_pathway	K25007	metV; methylenetetrahydrofolate reductase (NADH) small subunit	K25007	HMM_FullScore:371.03	KoFamScan
Carbon_fixation	WL_pathway	K25008	rnfC2; ion-translocating oxidoreductase complex subunit C	K25008	HMM_FullScore:1217.80	KoFamScan
Carbon_fixation	WL_pathway	K15023	acsE; 5-methyltetrahydrofolate corrinoid/iron sulfur protein methyltransferase [EC:2.1.1.258]	K15023	HMM_DomainScore:271.30	KoFamScan
Carbon_fixation	WL_pathway	K14138	acsB; acetyl-CoA synthase [EC:2.3.1.169]	K14138	HMM_FullScore:974.83	KoFamScan
Carbon_fixation	WL_pathway	K00197	cdhE, acsC; acetyl-CoA decarbonylase/synthase complex subunit gamma [EC:2.1.1.245]	K00197	HMM_FullScore:434.27	KoFamScan
Carbon_fixation	WL_pathway	K00194	cdhD, acsD; acetyl-CoA decarbonylase/synthase complex subunit delta [EC:2.1.1.245]	K00194	HMM_FullScore:336.53	KoFamScan
trimethylamine	tmm	K18277	tmm; trimethylamine monooxygenase [EC:1.14.13.148]	K18277	HMM_FullScore:631.30	KoFamScan
Central Carbon Metabolism	Pentose_phosphate_cycle	K13937	H6PD; hexose-6-phosphate dehydrogenase [EC:1.1.1.47 3.1.1.31]	K13937	HMM_FullScore:599.07	KoFamScan
Central Carbon Metabolism	Pentose_phosphate_cycle	K00036	G6PD, zwf; glucose-6-phosphate 1-dehydrogenase [EC:1.1.1.49 1.1.1.363]	K00036	HMM_FullScore:377.10	KoFamScan
Central Carbon Metabolism	Pentose_phosphate_cycle	K19243	azf; NAD+ dependent glucose-6-phosphate dehydrogenase [EC:1.1.1.388]	K19243	HMM_FullScore:264.57	KoFamScan
Central Carbon Metabolism	Pentose_phosphate_cycle	K01057	PGLS, pgl, devB; 6-phosphogluconolactonase [EC:3.1.1.31]	K01057	HMM_FullScore:116.93	KoFamScan
Central Carbon Metabolism	Pentose_phosphate_cycle	K07404	pgl; 6-phosphogluconolactonase [EC:3.1.1.31]	K07404	HMM_DomainScore:125.30	KoFamScan
Central Carbon Metabolism	Pentose_phosphate_cycle	K00033	PGD, gnd, gntZ; 6-phosphogluconate dehydrogenase [EC:1.1.1.44 1.1.1.343]	K00033	HMM_DomainScore:174.13	KoFamScan
Central Carbon Metabolism	Pentose_phosphate_cycle	K01783	rpe, RPE; ribulose-phosphate 3-epimerase [EC:5.1.3.1]	K01783	HMM_FullScore:245.30	KoFamScan
Central Carbon Metabolism	Pentose_phosphate_cycle	K01807	rpiA; ribose 5-phosphate isomerase A [EC:5.3.1.6]	K01807	HMM_FullScore:61.43	KoFamScan
Central Carbon Metabolism	Pentose_phosphate_cycle	K01808	rpiB; ribose 5-phosphate isomerase B [EC:5.3.1.6]	K01808	HMM_DomainScore:176.40	KoFamScan
Central Carbon Metabolism	Pentose_phosphate_cycle	K00616	E2.2.1.2, talA, talB; transaldolase [EC:2.2.1.2]	K00616	HMM_DomainScore:143.07	KoFamScan
Central Carbon Metabolism	Pentose_phosphate_cycle	K01810	GPI, pgi; glucose-6-phosphate isomerase [EC:5.3.1.9]	K01810	HMM_DomainScore:184.23	KoFamScan
Central Carbon Metabolism	Pentose_phosphate_cycle	K06859	pgi1; glucose-6-phosphate isomerase, archaeal [EC:5.3.1.9]	K06859	HMM_FullScore:106.03	KoFamScan
Central Carbon Metabolism	Pentose_phosphate_cycle	K13810	tal-pgi; transaldolase / glucose-6-phosphate isomerase [EC:2.2.1.2 5.3.1.9]	K13810	HMM_FullScore:684.87	KoFamScan
Central Carbon Metabolism	Pentose_phosphate_cycle	K15916	pgi-pmi; glucose/mannose-6-phosphate isomerase [EC:5.3.1.9 5.3.1.8]	K15916	HMM_FullScore:169.33	KoFamScan
Carbon_fixation	CBB_cycle_RuBisCo	rubisco_I	rubisco_form_I	metabolic_markers/rubisco_form_I	HMM_FullMode:--cut_tc	MetabolicHMM
Carbon_fixation	CBB_cycle_RuBisCo	rubisco_II	rubisco_form_II	metabolic_markers/rubisco_form_II	HMM_FullMode:--cut_tc	MetabolicHMM
Carbon_fixation	CBB_cycle_RuBisCo	rubisco_II_III	rubisco_form_II_III	metabolic_markers/rubisco_form_II_III	HMM_FullMode:--cut_tc	MetabolicHMM
Carbon_fixation	CBB_cycle_RuBisCo	rubisco_III	rubisco_form_III	metabolic_markers/rubisco_form_III	HMM_FullMode:--cut_tc	MetabolicHMM
Carbon_fixation	CBB_cycle_RuBisCo	rubisco_IV	rubisco_form_IV	metabolic_markers/rubisco_form_IV	HMM_FullMode:--cut_tc	MetabolicHMM
Carbon_fixation	CBB_cycle_full	K00855	PRK, prkB; phosphoribulokinase [EC:2.7.1.19]	K00855	HMM_FullScore:157.63	KoFamScan
Carbon_fixation	CBB_cycle_full	K01601	rbcL; ribulose-bisphosphate carboxylase large chain [EC:4.1.1.39]	K01601	HMM_FullScore:363.13	KoFamScan
Carbon_fixation	CBB_cycle_full	K01602	rbcS; ribulose-bisphosphate carboxylase small chain [EC:4.1.1.39]	K01602	HMM_DomainScore:44.40	KoFamScan
Carbon_fixation	CBB_cycle_full	K00927	PGK, pgk; phosphoglycerate kinase [EC:2.7.2.3]	K00927	HMM_FullScore:95.40	KoFamScan
Carbon_fixation	CBB_cycle_full	K05298	GAPA; glyceraldehyde-3-phosphate dehydrogenase (NADP+) (phosphorylating) [EC:1.2.1.13]	K05298	HMM_FullScore:651.80	KoFamScan
Carbon_fixation	CBB_cycle_full	K00150	gap2; glyceraldehyde-3-phosphate dehydrogenase (NAD(P)) [EC:1.2.1.59]	K00150	HMM_FullScore:279.87	KoFamScan
Carbon_fixation	CBB_cycle_full	K00134	GAPDH, gapA; glyceraldehyde 3-phosphate dehydrogenase [EC:1.2.1.12]	K00134	HMM_FullScore:413.73	KoFamScan
Carbon_fixation	CBB_cycle_full	K01623	ALDO; fructose-bisphosphate aldolase, class I [EC:4.1.2.13]	K01623	HMM_FullScore:44.93	KoFamScan
Carbon_fixation	CBB_cycle_full	K01624	FBA, fbaA; fructose-bisphosphate aldolase, class II [EC:4.1.2.13]	K01624	HMM_FullScore:85.80	KoFamScan
Carbon_fixation	CBB_cycle_full	K03841	FBP, fbp; fructose-1,6-bisphosphatase I [EC:3.1.3.11]	K03841	HMM_FullScore:219.70	KoFamScan
Carbon_fixation	CBB_cycle_full	K02446	glpX; fructose-1,6-bisphosphatase II [EC:3.1.3.11]	K02446	HMM_DomainScore:475.90	KoFamScan
Carbon_fixation	CBB_cycle_full	K11532	glpX-SEBP; fructose-1,6-bisphosphatase II / sedoheptulose-1,7-bisphosphatase [EC:3.1.3.11 3.1.3.37]	K11532	HMM_FullScore:479.20	KoFamScan
Carbon_fixation	CBB_cycle_full	K01086	fbp-SEBP; fructose-1,6-bisphosphatase I / sedoheptulose-1,7-bisphosphatase [EC:3.1.3.11 3.1.3.37]	K01086	HMM_DomainScore:588.33	KoFamScan
Carbon_fixation	CBB_cycle_full	K01623	ALDO; fructose-bisphosphate aldolase, class I [EC:4.1.2.13]	K01623	HMM_FullScore:44.93	KoFamScan
Carbon_fixation	CBB_cycle_full	K01624	FBA, fbaA; fructose-bisphosphate aldolase, class II [EC:4.1.2.13]	K01624	HMM_FullScore:85.80	KoFamScan
Carbon_fixation	CBB_cycle_full	K00615	E2.2.1.1, tktA, tktB; transketolase [EC:2.2.1.1]	K00615	HMM_DomainScore:242.70	KoFamScan
Carbon_fixation	CBB_cycle_full	K01100	E3.1.3.37; sedoheptulose-bisphosphatase [EC:3.1.3.37]	K01100	HMM_DomainScore:322.93	KoFamScan
Carbon_fixation	CBB_cycle_full	K11532	glpX-SEBP; fructose-1,6-bisphosphatase II / sedoheptulose-1,7-bisphosphatase [EC:3.1.3.11 3.1.3.37]	K11532	HMM_FullScore:479.20	KoFamScan
Carbon_fixation	CBB_cycle_full	K01086	fbp-SEBP; fructose-1,6-bisphosphatase I / sedoheptulose-1,7-bisphosphatase [EC:3.1.3.11 3.1.3.37]	K01086	HMM_DomainScore:588.33	KoFamScan
Carbon_fixation	CBB_cycle_full	K00615	E2.2.1.1, tktA, tktB; transketolase [EC:2.2.1.1]	K00615	HMM_DomainScore:242.70	KoFamScan
Carbon_fixation	CBB_cycle_full	K01807	rpiA; ribose 5-phosphate isomerase A [EC:5.3.1.6]	K01807	HMM_FullScore:61.43	KoFamScan
Carbon_fixation	CBB_cycle_full	K01808	rpiB; ribose 5-phosphate isomerase B [EC:5.3.1.6]	K01808	HMM_DomainScore:176.40	KoFamScan
HydrocarbonActivation	AbcA_1	AbcA_1	AbcA_1; benzene carboxylase	hydrocarbon/AbcA_1	HMM_FullMode:--cut_nc	CANT-HYD
HydrocarbonActivation	AbcA_2	AbcA_2	AbcA_2; benzene carboxylase	hydrocarbon/AbcA_2	HMM_FullMode:--cut_nc	CANT-HYD
HydrocarbonActivation	AhyA	AhyA	AhyA; molybdopterin-family alkane C2 methylene hydroxylase	hydrocarbon/AhyA	HMM_FullMode:--cut_nc	CANT-HYD
HydrocarbonActivation	AlkB	AlkB	AlkB; alkane hydrolase	hydrocarbon/AlkB	HMM_FullMode:--cut_nc	CANT-HYD
HydrocarbonActivation	AlmA_GroupI	AlmA_GroupI	AlmA_GroupI; flavin-binding alkane monooxygenase	hydrocarbon/AlmA_GroupI	HMM_FullMode:--cut_nc	CANT-HYD
HydrocarbonActivation	AlmA_GroupIII	AlmA_GroupIII	AlmA_GroupIII; flavin-binding alkane monooxygenase	hydrocarbon/AlmA_GroupIII	HMM_FullMode:--cut_nc	CANT-HYD
HydrocarbonActivation	AssA	AssA	AssA; alkylsuccinate synthase	hydrocarbon/AssA	HMM_FullMode:--cut_nc	CANT-HYD
HydrocarbonActivation	BssA	BssA	BssA; benzylsuccinate synthase	hydrocarbon/BssA	HMM_FullMode:--cut_nc	CANT-HYD
HydrocarbonActivation	CYP153	CYP153	CYP153; alkane oxidizing cytochrome P450	hydrocarbon/CYP153	HMM_FullMode:--cut_nc	CANT-HYD
HydrocarbonActivation	CmdA	CmdA	CmdA; molybdopterin-family ethylbenzene dehydrogenase subunit alpha	hydrocarbon/CmdA	HMM_FullMode:--cut_nc	CANT-HYD
HydrocarbonActivation	DmpO	DmpO	DmpO; phenol/toluene 2-monooxygenase (NADH dependent)	hydrocarbon/DmpO	HMM_FullMode:--cut_nc	CANT-HYD
HydrocarbonActivation	DszC	DszC	DszC; dibenzothiophene monooxygenase	hydrocarbon/DszC	HMM_FullMode:--cut_nc	CANT-HYD
HydrocarbonActivation	EbdA	EbdA	EbdA; molybdopterin-family ethylbenzene dehydrogenase subunit alpha	hydrocarbon/EbdA	HMM_FullMode:--cut_nc	CANT-HYD
HydrocarbonActivation	K27540	K27540	K27540; naphtalene carboxylase	hydrocarbon/K27540	HMM_FullMode:--cut_nc	CANT-HYD
HydrocarbonActivation	LadA_alpha	LadA_alpha	LadA_alpha; long-chain alkane hydrolase	hydrocarbon/LadA_alpha	HMM_FullMode:--cut_nc	CANT-HYD
HydrocarbonActivation	LadA_beta	LadA_beta	LadA_beta; long-chain alkane hydrolase	hydrocarbon/LadA_beta	HMM_FullMode:--cut_nc	CANT-HYD
HydrocarbonActivation	LadB	LadB	LadB; long-chain alkane hydrolase	hydrocarbon/LadB	HMM_FullMode:--cut_nc	CANT-HYD
HydrocarbonActivation	MAH_alpha	MAH_alpha	MAH_alpha; benzene/toluene/naphtalene dioxygenase subunit alpha	hydrocarbon/MAH_alpha	HMM_FullMode:--cut_nc	CANT-HYD
HydrocarbonActivation	MAH_beta	MAH_beta	MAH_beta; benzene/toluene/naphtalene dioxygenase subunit beta	hydrocarbon/MAH_beta	HMM_FullMode:--cut_nc	CANT-HYD
HydrocarbonActivation	NdoB	NdoB	NdoB; benzene/toluene/naphtalene dioxygenase subunit alpha	hydrocarbon/NdoB	HMM_FullMode:--cut_nc	CANT-HYD
HydrocarbonActivation	NdoC	NdoC	NdoC; benzene/toluene/naphtalene dioxygenase subunit beta	hydrocarbon/NdoC	HMM_FullMode:--cut_nc	CANT-HYD
HydrocarbonActivation	NmsA	NmsA	NmsA; naphtylmethyl succinate synthase	hydrocarbon/NmsA	HMM_FullMode:--cut_nc	CANT-HYD
HydrocarbonActivation	PrmA	PrmA	PrmA; propane 2-monooxygenase large subunit	hydrocarbon/PrmA	HMM_FullMode:--cut_nc	CANT-HYD
HydrocarbonActivation	PrmC	PrmC	PrmC; propane 2-monooxygenase small subunit	hydrocarbon/PrmC	HMM_FullMode:--cut_nc	CANT-HYD
HydrocarbonActivation	TmoA_BmoA	TmoA_BmoA	TmoA_BmoA; toluene monooxygenase subunit A	hydrocarbon/TmoA_BmoA	HMM_FullMode:--cut_nc	CANT-HYD
HydrocarbonActivation	TmoB_BmoB	TmoB_BmoB	TmoB_BmoB; toluene monooxygenase subunit B	hydrocarbon/TmoB_BmoB	HMM_FullMode:--cut_nc	CANT-HYD
HydrocarbonActivation	TmoE	TmoE	TmoE; toluene monooxygenase system protein E	hydrocarbon/TmoE	HMM_FullMode:--cut_nc	CANT-HYD
HydrocarbonActivation	TomA1	TomA1	TomA1; phenol/toluene monooxygenase/hydroxylase (NADH dependent)	hydrocarbon/TomA1	HMM_FullMode:--cut_nc	CANT-HYD
HydrocarbonActivation	TomA3	TomA3	TomA3; phenol/toluene monooxygenase/hydroxylase (NADH dependent)	hydrocarbon/TomA3	HMM_FullMode:--cut_nc	CANT-HYD
HydrocarbonActivation	TomA4	TomA4	TomA4; phenol/toluene monooxygenase/hydroxylase (NADH dependent)	hydrocarbon/TomA4	HMM_FullMode:--cut_nc	CANT-HYD
HydrocarbonActivation	non_NdoB_type	non_NdoB_type	non_NdoB_type; similar to benzene/toluene/naphtalene dioxygenase subunit alpha	hydrocarbon/non_NdoB_type	HMM_FullMode:--cut_nc	CANT-HYD
HydrocarbonActivation	pBmoA	pBmoA	pBmoA; membrane-bound alkane monooxygenase subunit A	hydrocarbon/pBmoA	HMM_FullMode:--cut_nc	CANT-HYD
HydrocarbonActivation	pBmoB	pBmoB	pBmoB; membrane-bound alkane monooxygenase subunit B	hydrocarbon/pBmoB	HMM_FullMode:--cut_nc	CANT-HYD
HydrocarbonActivation	pBmoC	pBmoC	pBmoC; membrane-bound alkane monooxygenase subunit C	hydrocarbon/pBmoC	HMM_FullMode:--cut_nc	CANT-HYD
HydrocarbonActivation	sBmoX	sBmoX	sBmoX; soluble alkane monooxygenase subunit A	hydrocarbon/sBmoX	HMM_FullMode:--cut_nc	CANT-HYD
HydrocarbonActivation	sBmoY	sBmoY	sBmoY; soluble alkane monooxygenase subunit B	hydrocarbon/sBmoY	HMM_FullMode:--cut_nc	CANT-HYD
CO_utilization	coxL-M-S	carbon_monoxide_dehydrogenase_coxL_TIGR02416	coxL; aerobic carbon-monoxide dehydrogenase large subunit [EC:1.2.5.3]	metabolic_markers/carbon_monoxide_dehydrogenase_coxL_TIGR02416	HMM_FullMode:--cut_tc	MetabolicHMM
CO_utilization	coxL-M-S	carbon_monoxide_dehydrogenase_coxM	coxM; aerobic carbon-monoxide dehydrogenase medium subunit [EC:1.2.5.3]	metabolic_markers/carbon_monoxide_dehydrogenase_coxM	HMM_FullMode:--cut_tc	MetabolicHMM
CO_utilization	coxL-M-S	carbon_monoxide_dehydrogenase_coxS	coxS; aerobic carbon-monoxide dehydrogenase small subunit [EC:1.2.5.3]	metabolic_markers/carbon_monoxide_dehydrogenase_coxS	HMM_FullMode:--cut_tc	MetabolicHMM
aerobic_methane_oxidation	mmoXYZ	mmoX	mmoX; methane monooxygenase component A alpha chain [EC:1.14.13.25]	K16157	HMM_FullScore:1157.03	KoFamScan
aerobic_methane_oxidation	mmoXYZ	mmoY	mmoY; methane monooxygenase component A beta chain [EC:1.14.13.25]	K16158	HMM_FullScore:696.17	KoFamScan
aerobic_methane_oxidation	mmoXYZ	mmoZ	mmoZ; methane monooxygenase component A gamma chain [EC:1.14.13.25]	K16159	HMM_FullScore:252.27	KoFamScan
aerobic_methane_oxidation	mmoXYZ	mmoC	mmoC; methane monooxygenase component C [EC:1.14.13.25]	K16161	HMM_FullScore:538.70	KoFamScan
aerobic_methane_oxidation	pmoABC	pmoC-amoC	pmoC-amoC; methane/ammonia monooxygenase subunit C	K10946	HMM_FullScore:141.57	KoFamScan
aerobic_methane_oxidation	pmoABC	pmoB-amoB	pmoB-amoB; methane/ammonia monooxygenase subunit B	K10945	HMM_FullScore:156.27	KoFamScan
aerobic_methane_oxidation	pmoABC	pmoA-amoA	pmoA-amoA; methane/ammonia monooxygenase subunit A [EC:1.14.18.3 1.14.99.39]	K10944	HMM_FullScore:155.30	KoFamScan
aerobic_methane_oxidation	methanol dehydrogenase	mdh1	mdh1, mxaF; methanol dehydrogenase (cytochrome c) subunit 1 [EC:1.1.2.7]	K14028	HMM_FullScore:1048.37	KoFamScan
aerobic_methane_oxidation	methanol dehydrogenase	mdh2	mdh2, mxaI; methanol dehydrogenase (cytochrome c) subunit 2 [EC:1.1.2.7]	K14029	HMM_FullScore:129.30	KoFamScan
aerobic_methane_oxidation	methanol dehydrogenase	xoxF	xoxF; lanthanide-dependent methanol dehydrogenase [EC:1.1.2.10]	K23995	HMM_FullScore:836.63	KoFamScan
aerobic_methane_oxidation	methanol dehydrogenase	MOX	MOX; alcohol oxidase [EC:1.1.3.13]	K17066	HMM_DomainScore:427.70	KoFamScan
Carbon_fixation	3HP_bicycle	accB	accB, bccP; acetyl-CoA carboxylase biotin carboxyl carrier protein	K02160	HMM_DomainScore:89.30	KoFamScan
Carbon_fixation	3HP_bicycle	accC	accC; acetyl-CoA carboxylase, biotin carboxylase subunit [EC:6.4.1.2 6.3.4.14]	K01961	HMM_DomainScore:708.73	KoFamScan
Carbon_fixation	3HP_bicycle	accA	accA; acetyl-CoA carboxylase carboxyl transferase subunit alpha [EC:6.4.1.2]	K01962	HMM_DomainScore:411.37	KoFamScan
Carbon_fixation	3HP_bicycle	accD	accD; acetyl-CoA carboxylase carboxyl transferase subunit beta [EC:6.4.1.2]	K01963	HMM_DomainScore:321.90	KoFamScan
Carbon_fixation	3HP_bicycle	mcr	mcr; malonyl-CoA reductase / 3-hydroxypropionate dehydrogenase (NADP+) [EC:1.2.1.75 1.1.1.298]	K14468	HMM_FullScore:1826.67	KoFamScan
Carbon_fixation	3HP_bicycle	K14469	K14469; acrylyl-CoA reductase (NADPH) / 3-hydroxypropionyl-CoA dehydratase / 3-hydroxypropionyl-CoA synthetase [EC:1.3.1.84 4.2.1.116 6.2.1.36]	K14469	HMM_FullScore:2240.50	KoFamScan
Carbon_fixation	3HP_bicycle	K15052	K15052; propionyl-CoA carboxylase [EC:6.4.1.3]	K15052	HMM_FullScore:1060.33	KoFamScan
Carbon_fixation	3HP_bicycle	MCEE	MCEE, epi; methylmalonyl-CoA/ethylmalonyl-CoA epimerase [EC:5.1.99.1]	K05606	HMM_DomainScore:77.03	KoFamScan
Carbon_fixation	3HP_bicycle	MUT	MUT; methylmalonyl-CoA mutase [EC:5.4.99.2]	K01847	HMM_FullScore:718.43	KoFamScan
Carbon_fixation	3HP_bicycle	E5.4.99.2A	E5.4.99.2A, mcmA1; methylmalonyl-CoA mutase, N-terminal domain [EC:5.4.99.2]	K01848	HMM_DomainScore:804.17	KoFamScan
Carbon_fixation	3HP_bicycle	E5.4.99.2B	E5.4.99.2B, mcmA2; methylmalonyl-CoA mutase, C-terminal domain [EC:5.4.99.2]	K01849	HMM_DomainScore:199.80	KoFamScan
Carbon_fixation	3HP_bicycle	smtA1	smtA1; succinyl-CoA:(S)-malate CoA-transferase subunit A [EC:2.8.3.22]	K14471	HMM_FullScore:890.80	KoFamScan
Carbon_fixation	3HP_bicycle	smtB	smtB; succinyl-CoA:(S)-malate CoA-transferase subunit B [EC:2.8.3.22]	K14472	HMM_FullScore:834.20	KoFamScan
Carbon_fixation	3HP_bicycle	sdhA	sdhA, frdA; succinate dehydrogenase / fumarate reductase, flavoprotein subunit [EC:1.3.5.1 1.3.5.4]	K00239	HMM_DomainScore:690.20	KoFamScan
Carbon_fixation	3HP_bicycle	sdhB	sdhB, frdB; succinate dehydrogenase / fumarate reductase, iron-sulfur subunit [EC:1.3.5.1 1.3.5.4]	K00240	HMM_DomainScore:103.30	KoFamScan
Carbon_fixation	3HP_bicycle	sdhC	sdhC, frdC; succinate dehydrogenase / fumarate reductase, cytochrome b subunit	K00241	HMM_DomainScore:54.17	KoFamScan
Carbon_fixation	3HP_bicycle	E4.2.1.2B	E4.2.1.2B, fumC; fumarate hydratase, class II [EC:4.2.1.2]	K01679	HMM_FullScore:642.30	KoFamScan
Carbon_fixation	3HP_bicycle	mcl	mcl; malyl-CoA/(S)-citramalyl-CoA lyase [EC:4.1.3.24 4.1.3.25]	K08691	HMM_DomainScore:382.20	KoFamScan
Carbon_fixation	3HP_bicycle	mch	mch, mcd; 2-methylfumaryl-CoA hydratase [EC:4.2.1.148]	K14449	HMM_FullScore:249.90	KoFamScan
Carbon_fixation	3HP_bicycle	mct	mct; 2-methylfumaryl-CoA isomerase [EC:5.4.1.3]	K14470	HMM_FullScore:475.43	KoFamScan
Carbon_fixation	3HP_bicycle	meh	meh; 3-methylfumaryl-CoA hydratase [EC:4.2.1.153]	K09709	HMM_FullScore:195.50	KoFamScan
Carbon_fixation	3HP_4HB	K01964	K01964; acetyl-CoA/propionyl-CoA carboxylase [EC:6.4.1.2 6.4.1.3]	K01964	HMM_FullScore:988.53	KoFamScan
Carbon_fixation	3HP_4HB	K15037	K15037; biotin carboxyl carrier protein	K15037	HMM_DomainScore:124.10	KoFamScan
Carbon_fixation	3HP_4HB	K15036	K15036; acetyl-CoA/propionyl-CoA carboxylase [EC:6.4.1.2 6.4.1.3]	K15036	HMM_FullScore:1065.30	KoFamScan
Carbon_fixation	3HP_4HB	K15017	K15017; malonyl-CoA/succinyl-CoA reductase (NADPH) [EC:1.2.1.75 1.2.1.76]	K15017	HMM_FullScore:699.33	KoFamScan
Carbon_fixation	3HP_4HB	K15039	K15039; 3-hydroxypropionate dehydrogenase (NADP+) [EC:1.1.1.298]	K15039	HMM_FullScore:447.10	KoFamScan
Carbon_fixation	3HP_4HB	K15018	K15018; 3-hydroxypropionyl-coenzyme A synthetase [EC:6.2.1.36]	K15018	HMM_FullScore:1329.97	KoFamScan
Carbon_fixation	3HP_4HB	K15019	K15019; 3-hydroxypropionyl-coenzyme A dehydratase [EC:4.2.1.116]	K15019	HMM_FullScore:337.17	KoFamScan
Carbon_fixation	3HP_4HB	K15020	K15020; acryloyl-coenzyme A reductase [EC:1.3.1.84]	K15020	HMM_DomainScore:317.87	KoFamScan
Carbon_fixation	3HP_4HB	MCEE	MCEE, epi; methylmalonyl-CoA/ethylmalonyl-CoA epimerase [EC:5.1.99.1]	K05606	HMM_DomainScore:77.03	KoFamScan
Carbon_fixation	3HP_4HB	E5.4.99.2A	E5.4.99.2A, mcmA1; methylmalonyl-CoA mutase, N-terminal domain [EC:5.4.99.2]	K01848	HMM_DomainScore:804.17	KoFamScan
Carbon_fixation	3HP_4HB	E5.4.99.2B	E5.4.99.2B, mcmA2; methylmalonyl-CoA mutase, C-terminal domain [EC:5.4.99.2]	K01849	HMM_DomainScore:199.80	KoFamScan
Carbon_fixation	3HP_4HB	K15038	K15038; succinyl-CoA reductase [EC:1.2.1.76]	K15038	HMM_FullScore:692.97	KoFamScan
Carbon_fixation	3HP_4HB	K15017	K15017; malonyl-CoA/succinyl-CoA reductase (NADPH) [EC:1.2.1.75 1.2.1.76]	K15017	HMM_FullScore:699.33	KoFamScan
Carbon_fixation	3HP_4HB	K14465	K14465; succinate semialdehyde reductase (NADPH) [EC:1.1.1.-]	K14465	HMM_DomainScore:459.47	KoFamScan
Carbon_fixation	3HP_4HB	K14466	K14466; 4-hydroxybutyrate---CoA ligase (AMP-forming) [EC:6.2.1.40]	K14466	HMM_FullScore:879.13	KoFamScan
Carbon_fixation	3HP_4HB	K18861	K18861; 4-hydroxybutyrate---CoA ligase (AMP-forming) [EC:6.2.1.40]	K18861	HMM_FullScore:937.90	KoFamScan
Carbon_fixation	3HP_4HB	abfD	abfD; 4-hydroxybutyryl-CoA dehydratase / vinylacetyl-CoA-Delta-isomerase [EC:4.2.1.120 5.3.3.3]	K14534	HMM_FullScore:420.10	KoFamScan
Carbon_fixation	3HP_4HB	K15016	K15016; enoyl-CoA hydratase / 3-hydroxyacyl-CoA dehydrogenase [EC:4.2.1.17 1.1.1.35]	K15016	HMM_DomainScore:430.53	KoFamScan
Carbon_fixation	3HP_4HB	E2.3.1.9	E2.3.1.9, atoB; acetyl-CoA C-acetyltransferase [EC:2.3.1.9]	K00626	HMM_DomainScore:55.27	KoFamScan
Carbon_fixation	DC_4HB	porA	porA; pyruvate ferredoxin oxidoreductase alpha subunit [EC:1.2.7.1]	K00169	HMM_DomainScore:290.63	KoFamScan
Carbon_fixation	DC_4HB	porB	porB; pyruvate ferredoxin oxidoreductase beta subunit [EC:1.2.7.1]	K00170	HMM_FullScore:318.13	KoFamScan
Carbon_fixation	DC_4HB	porD	porD; pyruvate ferredoxin oxidoreductase delta subunit [EC:1.2.7.1]	K00171	HMM_DomainScore:101.90	KoFamScan
Carbon_fixation	DC_4HB	porG	porG; pyruvate ferredoxin oxidoreductase gamma subunit [EC:1.2.7.1]	K00172	HMM_DomainScore:144.40	KoFamScan
Carbon_fixation	DC_4HB	pps, ppsA	pps, ppsA; pyruvate, water dikinase [EC:2.7.9.2]	K01007	HMM_DomainScore:382.90	KoFamScan
Carbon_fixation	DC_4HB	ppc	ppc; phosphoenolpyruvate carboxylase [EC:4.1.1.31]	K01595	HMM_FullScore:49.03	KoFamScan
Carbon_fixation	DC_4HB	mdh	mdh; malate dehydrogenase [EC:1.1.1.37]	K00024	HMM_DomainScore:331.37	KoFamScan
Carbon_fixation	DC_4HB	E4.2.1.2AA, fumA	E4.2.1.2AA, fumA; fumarate hydratase subunit alpha [EC:4.2.1.2]	K01677	HMM_DomainScore:301.07	KoFamScan
Carbon_fixation	DC_4HB	E4.2.1.2AB, fumB	E4.2.1.2AB, fumB; fumarate hydratase subunit beta [EC:4.2.1.2]	K01678	HMM_DomainScore:220.17	KoFamScan
Carbon_fixation	DC_4HB	sdhA, frdA	sdhA, frdA; succinate dehydrogenase / fumarate reductase, flavoprotein subunit [EC:1.3.5.1 1.3.5.4]	K00239	HMM_DomainScore:690.20	KoFamScan
Carbon_fixation	DC_4HB	sdhB, frdB	sdhB, frdB; succinate dehydrogenase / fumarate reductase, iron-sulfur subunit [EC:1.3.5.1 1.3.5.4]	K00240	HMM_DomainScore:103.30	KoFamScan
Carbon_fixation	DC_4HB	sdhC, frdC	sdhC, frdC; succinate dehydrogenase / fumarate reductase, cytochrome b subunit	K00241	HMM_DomainScore:54.17	KoFamScan
Carbon_fixation	DC_4HB	sdhD, frdD	sdhD, frdD; putative succinate dehydrogenase / fumarate reductase, subunit D	K18860	HMM_FullScore:127.53	KoFamScan
Carbon_fixation	DC_4HB	sucD	sucD; succinyl-CoA synthetase alpha subunit [EC:6.2.1.5]	K01902	HMM_DomainScore:367.37	KoFamScan
Carbon_fixation	DC_4HB	sucC	sucC; succinyl-CoA synthetase beta subunit [EC:6.2.1.5]	K01903	HMM_DomainScore:503.57	KoFamScan
Carbon_fixation	DC_4HB	K15038	K15038; succinyl-CoA reductase [EC:1.2.1.76]	K15038	HMM_FullScore:692.97	KoFamScan
Carbon_fixation	DC_4HB	K15017	K15017; malonyl-CoA/succinyl-CoA reductase (NADPH) [EC:1.2.1.75 1.2.1.76]	K15017	HMM_FullScore:699.33	KoFamScan
Carbon_fixation	DC_4HB	K14465	K14465; succinate semialdehyde reductase (NADPH) [EC:1.1.1.-]	K14465	HMM_DomainScore:459.47	KoFamScan
Carbon_fixation	DC_4HB	4hbl	4hbl; 4-hydroxybutyrate---CoA ligase (AMP-forming) [EC:6.2.1.40]	K14467	HMM_DomainScore:1101.43	KoFamScan
Carbon_fixation	DC_4HB	K18861	K18861; 4-hydroxybutyrate---CoA ligase (AMP-forming) [EC:6.2.1.40]	K18861	HMM_FullScore:937.90	KoFamScan
Carbon_fixation	DC_4HB	abfD	abfD; 4-hydroxybutyryl-CoA dehydratase / vinylacetyl-CoA-Delta-isomerase [EC:4.2.1.120 5.3.3.3]	K14534	HMM_FullScore:420.10	KoFamScan
Carbon_fixation	DC_4HB	K15016	K15016; enoyl-CoA hydratase / 3-hydroxyacyl-CoA dehydrogenase [EC:4.2.1.17 1.1.1.35]	K15016	HMM_DomainScore:430.53	KoFamScan
Carbon_fixation	DC_4HB	E2.3.1.9, atoB	E2.3.1.9, atoB; acetyl-CoA C-acetyltransferase [EC:2.3.1.9]	K00626	HMM_DomainScore:55.27	KoFamScan
organosulfur	dmdA	dmdA	dmdA; dimethylsulfoniopropionate demethylase [EC:2.1.1.269]	K17486	HMM_FullScore:528.47	KoFamScan
organosulfur	xsc	xsc	xsc; sulfoacetaldehyde acetyltransferase [EC:2.3.3.15]	K03852	HMM_FullScore:643.47	KoFamScan
organosulfur	tauD	tauD	tauD; taurine dioxygenase [EC:1.14.11.17]	K03119	HMM_DomainScore:338.07	KoFamScan
organosulfur	tpa	tpa	tpa; taurine-pyruvate aminotransferase [EC:2.6.1.77]	K03851	HMM_FullScore:601.23	KoFamScan
organosulfur	tauX	tauX	tauX; taurine dehydrogenase small subunit [EC:1.4.2.-]	K07255	HMM_FullScore:173.83	KoFamScan
organosulfur	tauY	tauY	tauY; taurine dehydrogenase large subunit [EC:1.4.2.-]	K07256	HMM_FullScore:818.10	KoFamScan
organosulfur	toa	toa	toa; taurine---2-oxoglutarate transaminase [EC:2.6.1.55]	K15372	HMM_DomainScore:445.53	KoFamScan
organosulfur	islA	islA	islA; isethionate sulfite-lyase [EC:4.4.1.38]	K25261	HMM_FullScore:1479.70	KoFamScan
organosulfur	cuyA	cuyA	cuyA; L-cysteate sulfo-lyase [EC:4.4.1.25]	K17950	HMM_FullScore:431.97	KoFamScan
organosulfur	suyA	suyA	suyA; (2R)-sulfolactate sulfo-lyase subunit alpha [EC:4.4.1.24]	K16845	HMM_FullScore:100.17	KoFamScan
organosulfur	suyB	suyB	suyB; (2R)-sulfolactate sulfo-lyase subunit beta [EC:4.4.1.24]	K16846	HMM_FullScore:583.80	KoFamScan
organosulfur	hpsN	hpsN	hpsN; sulfopropanediol 3-dehydrogenase [EC:1.1.1.308]	K15509	HMM_FullScore:516.60	KoFamScan
organosulfur	slcC	slcC	slcC; (S)-sulfolactate dehydrogenase [EC:1.1.1.310]	K16843	HMM_DomainScore:385.20	KoFamScan
organosulfur	comC	comC	comC; (2R)-3-sulfolactate dehydrogenase (NADP+) [EC:1.1.1.338]	K16844	HMM_FullScore:364.17	KoFamScan
organosulfur	comD	comD	comD; sulfopyruvate decarboxylase subunit alpha [EC:4.1.1.79]	K06034	HMM_DomainScore:172.07	KoFamScan
organosulfur	comDE	comDE	comDE; sulfopyruvate decarboxylase [EC:4.1.1.79]	K24393	HMM_FullScore:419.50	KoFamScan
Fermentation	Pyruvate_to_Lactate	LDH, ldh	LDH, ldh; L-lactate dehydrogenase [EC:1.1.1.27]	K00016	HMM_FullScore:313.57	KoFamScan
Fermentation	Pyruvate_to_Formate	E2.3.1.54, pflD	E2.3.1.54, pflD; formate C-acetyltransferase [EC:2.3.1.54]	K00656	HMM_FullScore:403.93	KoFamScan
Fermentation	Pyuvate_to_Acetate_I	aceE	aceE; pyruvate dehydrogenase E1 component [EC:1.2.4.1]	K00163	HMM_FullScore:374.67	KoFamScan
Fermentation	Pyuvate_to_Acetate_I	PDHA, pdhA	PDHA, pdhA; pyruvate dehydrogenase E1 component alpha subunit [EC:1.2.4.1]	K00161	HMM_FullScore:424.67	KoFamScan
Fermentation	Pyuvate_to_Acetate_I	PDHB, pdhB	PDHB, pdhB; pyruvate dehydrogenase E1 component beta subunit [EC:1.2.4.1]	K00162	HMM_FullScore:488.57	KoFamScan
Fermentation	Pyuvate_to_Acetate_I	DLAT, aceF, pdhC	DLAT, aceF, pdhC; pyruvate dehydrogenase E2 component (dihydrolipoamide acetyltransferase) [EC:2.3.1.12]	K00627	HMM_DomainScore:484.73	KoFamScan
Fermentation	Pyuvate_to_Acetate_I	DLD, lpd, pdhD	DLD, lpd, pdhD; dihydrolipoamide dehydrogenase [EC:1.8.1.4]	K00382	HMM_FullScore:466.70	KoFamScan
Fermentation	Pyuvate_to_Acetate_I	PDHX	PDHX; dihydrolipoamide dehydrogenase-binding protein of pyruvate dehydrogenase complex	K13997	HMM_DomainScore:543.87	KoFamScan
Fermentation	Pyuvate_to_Acetate_I	porA	porA; pyruvate ferredoxin oxidoreductase alpha subunit [EC:1.2.7.1]	K00169	HMM_DomainScore:290.63	KoFamScan
Fermentation	Pyuvate_to_Acetate_I	porB	porB; pyruvate ferredoxin oxidoreductase beta subunit [EC:1.2.7.1]	K00170	HMM_FullScore:318.13	KoFamScan
Fermentation	Pyuvate_to_Acetate_I	porD	porD; pyruvate ferredoxin oxidoreductase delta subunit [EC:1.2.7.1]	K00171	HMM_DomainScore:101.90	KoFamScan
Fermentation	Pyuvate_to_Acetate_I	porG	porG; pyruvate ferredoxin oxidoreductase gamma subunit [EC:1.2.7.1]	K00172	HMM_DomainScore:144.40	KoFamScan
Fermentation	Pyuvate_to_Acetate_I	vorG	vorG; 2-oxoisovalerate ferredoxin oxidoreductase, gamma subunit [EC:1.2.7.7]	K00189	HMM_FullScore:296.23	KoFamScan
Fermentation	Pyuvate_to_Acetate_I	por, nifJ	por, nifJ; pyruvate-ferredoxin/flavodoxin oxidoreductase [EC:1.2.7.1 1.2.7.-]	K03737	HMM_FullScore:569.73	KoFamScan
Fermentation	Pyuvate_to_Acetate_I	E3.1.2.1, ACH1	E3.1.2.1, ACH1; acetyl-CoA hydrolase [EC:3.1.2.1]	K01067	HMM_FullScore:505.90	KoFamScan
Fermentation	Pyuvate_to_Acetate_I	pta	pta; phosphate acetyltransferase [EC:2.3.1.8]	K13788	HMM_FullScore:561.23	KoFamScan
Fermentation	Pyuvate_to_Acetate_I	eutD	eutD; phosphotransacetylase	K04020	HMM_FullScore:433.63	KoFamScan
Fermentation	Pyuvate_to_Acetate_I	acyP	acyP; acylphosphatase [EC:3.6.1.7]	K01512	HMM_DomainScore:75.90	KoFamScan
Fermentation	Pyuvate_to_Acetate_II	poxB	poxB; pyruvate dehydrogenase (quinone) [EC:1.2.5.1]	K00156	HMM_FullScore:714.10	KoFamScan
Fermentation	Pyuvate_to_Acetate_II	E1.2.3.3, poxL	E1.2.3.3, poxL; pyruvate oxidase [EC:1.2.3.3]	K00158	HMM_FullScore:612.00	KoFamScan
Fermentation	Pyuvate_to_Acetate_II	acyP	acyP; acylphosphatase [EC:3.6.1.7]	K01512	HMM_DomainScore:75.90	KoFamScan
Fermentation	Ethanol_formation	ALDH	ALDH; aldehyde dehydrogenase (NAD+) [EC:1.2.1.3]	K00128	HMM_FullScore:590.27	KoFamScan
Fermentation	Ethanol_formation	ALDH7A1	ALDH7A1; aldehyde dehydrogenase family 7 member A1 [EC:1.2.1.31 1.2.1.8 1.2.1.3]	K14085	HMM_FullScore:793.20	KoFamScan
Fermentation	Ethanol_formation	ALDH9A1	ALDH9A1; aldehyde dehydrogenase family 9 member A1 [EC:1.2.1.47 1.2.1.3]	K00149	HMM_DomainScore:745.50	KoFamScan
Fermentation	Ethanol_formation	E1.2.1.5	E1.2.1.5; aldehyde dehydrogenase (NAD(P)+) [EC:1.2.1.5]	K00129	HMM_FullScore:771.93	KoFamScan
Fermentation	Ethanol_formation	aldB	aldB; aldehyde dehydrogenase [EC:1.2.1.-]	K00138	HMM_DomainScore:736.23	KoFamScan
Fermentation	Ethanol_formation	E1.2.1.10	E1.2.1.10; acetaldehyde dehydrogenase (acetylating) [EC:1.2.1.10]	K00132	HMM_FullScore:655.60	KoFamScan
Fermentation	Ethanol_formation	adhE	adhE; acetaldehyde dehydrogenase / alcohol dehydrogenase [EC:1.2.1.10 1.1.1.1]	K04072	HMM_FullScore:644.90	KoFamScan
Fermentation	Ethanol_formation	mhpF	mhpF; acetaldehyde dehydrogenase [EC:1.2.1.10]	K04073	HMM_DomainScore:455.10	KoFamScan
Fermentation	Ethanol_formation	bphJ, xylQ, nahO, tesF	bphJ, xylQ, nahO, tesF; acetaldehyde/propanal dehydrogenase [EC:1.2.1.10 1.2.1.87]	K18366	HMM_FullScore:479.50	KoFamScan
Fermentation	Ethanol_formation	eutE	eutE; aldehyde dehydrogenase	K04021	HMM_FullScore:662.37	KoFamScan
Fermentation	Ethanol_formation	ADH1_7	ADH1_7; alcohol dehydrogenase 1/7 [EC:1.1.1.1]	K13951	HMM_DomainScore:667.30	KoFamScan
Fermentation	Ethanol_formation	ADH4	ADH4; alcohol dehydrogenase 4 [EC:1.1.1.1]	K13980	HMM_DomainScore:674.20	KoFamScan
Fermentation	Ethanol_formation	ADH6	ADH6; alcohol dehydrogenase 6 [EC:1.1.1.1]	K13952	HMM_DomainScore:656.50	KoFamScan
Fermentation	Ethanol_formation	adhP	adhP; alcohol dehydrogenase, propanol-preferring [EC:1.1.1.1]	K13953	HMM_DomainScore:332.20	KoFamScan
Fermentation	Ethanol_formation	yiaY	yiaY; alcohol dehydrogenase [EC:1.1.1.1]	K13954	HMM_FullScore:562.60	KoFamScan
Fermentation	Ethanol_formation	E1.1.1.1, adh	E1.1.1.1, adh; alcohol dehydrogenase [EC:1.1.1.1]	K00001	HMM_DomainScore:342.93	KoFamScan
Fermentation	Ethanol_formation	frmA, ADH5, adhC	frmA, ADH5, adhC; S-(hydroxymethyl)glutathione dehydrogenase / alcohol dehydrogenase [EC:1.1.1.284 1.1.1.1]	K00121	HMM_DomainScore:619.87	KoFamScan
Fermentation	Ethanol_formation	adhE	adhE; acetaldehyde dehydrogenase / alcohol dehydrogenase [EC:1.2.1.10 1.1.1.1]	K04072	HMM_FullScore:644.90	KoFamScan
Fermentation	Ethanol_formation	ADH1	ADH1; alcohol dehydrogenase class-P [EC:1.1.1.1]	K18857	HMM_FullScore:631.40	KoFamScan
Fermentation	Ethanol_formation	eutG	eutG; alcohol dehydrogenase	K04022	HMM_FullScore:468.73	KoFamScan
Fermentation	Ethanol_formation	exaA	exaA; alcohol dehydrogenase (cytochrome c) [EC:1.1.2.8]	K00114	HMM_FullScore:643.97	KoFamScan
Fermentation	Ethanol_formation	mdh1, mxaF	mdh1, mxaF; methanol dehydrogenase (cytochrome c) subunit 1 [EC:1.1.2.7]	K14028	HMM_FullScore:1048.37	KoFamScan
Fermentation	Ethanol_formation	mdh2, mxaI	mdh2, mxaI; methanol dehydrogenase (cytochrome c) subunit 2 [EC:1.1.2.7]	K14029	HMM_FullScore:129.30	KoFamScan
Fermentation	PEP_to_Succinate	E4.1.1.32, pckA, PCK	E4.1.1.32, pckA, PCK; phosphoenolpyruvate carboxykinase (GTP) [EC:4.1.1.32]	K01596	HMM_FullScore:267.10	KoFamScan
Fermentation	PEP_to_Succinate	PEPCK	PEPCK; phosphoenolpyruvate carboxykinase (diphosphate) [EC:4.1.1.38]	K20370	HMM_FullScore:1495.83	KoFamScan
Fermentation	PEP_to_Succinate	E4.1.1.49, pckA	E4.1.1.49, pckA; phosphoenolpyruvate carboxykinase (ATP) [EC:4.1.1.49]	K01610	HMM_FullScore:123.47	KoFamScan
Fermentation	PEP_to_Succinate	MDH1	MDH1; malate dehydrogenase [EC:1.1.1.37]	K00025	HMM_FullScore:550.20	KoFamScan
Fermentation	PEP_to_Succinate	MDH2	MDH2; malate dehydrogenase [EC:1.1.1.37]	K00026	HMM_FullScore:501.90	KoFamScan
Fermentation	PEP_to_Succinate	mdh	mdh; malate dehydrogenase [EC:1.1.1.37]	K00024	HMM_DomainScore:331.37	KoFamScan
Fermentation	PEP_to_Succinate	E1.1.1.82	E1.1.1.82; malate dehydrogenase (NADP+) [EC:1.1.1.82]	K00051	HMM_FullScore:634.67	KoFamScan
Fermentation	PEP_to_Succinate	mqo	mqo; malate dehydrogenase (quinone) [EC:1.1.5.4]	K00116	HMM_FullScore:161.30	KoFamScan
Fermentation	PEP_to_Succinate	E4.2.1.2A, fumA, fumB	E4.2.1.2A, fumA, fumB; fumarate hydratase, class I [EC:4.2.1.2]	K01676	HMM_FullScore:351.63	KoFamScan
Fermentation	PEP_to_Succinate	E4.2.1.2AA, fumA	E4.2.1.2AA, fumA; fumarate hydratase subunit alpha [EC:4.2.1.2]	K01677	HMM_DomainScore:301.07	KoFamScan
Fermentation	PEP_to_Succinate	E4.2.1.2AB, fumB	E4.2.1.2AB, fumB; fumarate hydratase subunit beta [EC:4.2.1.2]	K01678	HMM_DomainScore:220.17	KoFamScan
Fermentation	PEP_to_Succinate	E4.2.1.2B, fumC	E4.2.1.2B, fumC; fumarate hydratase, class II [EC:4.2.1.2]	K01679	HMM_FullScore:642.30	KoFamScan
Fermentation	PEP_to_Succinate	frdA	frdA; fumarate reductase flavoprotein subunit [EC:1.3.5.4]	K00244	HMM_DomainScore:365.50	KoFamScan
Fermentation	PEP_to_Succinate	frdB	frdB; fumarate reductase iron-sulfur subunit [EC:1.3.5.4]	K00245	HMM_DomainScore:279.30	KoFamScan
Fermentation	PEP_to_Succinate	frdC	frdC; fumarate reductase subunit C	K00246	HMM_DomainScore:53.70	KoFamScan
Fermentation	PEP_to_Succinate	frdD	frdD; fumarate reductase subunit D	K00247	HMM_FullScore:36.67	KoFamScan
Formaldehyde_assimilation	Ribulose_monophosphate_pathway	hxlA	hxlA; 3-hexulose-6-phosphate synthase [EC:4.1.2.43]	K08093	HMM_DomainScore:173.07	KoFamScan
Formaldehyde_assimilation	Ribulose_monophosphate_pathway	fae-hps	fae-hps; bifunctional enzyme Fae/Hps [EC:4.2.1.147 4.1.2.43]	K13812	HMM_FullScore:353.60	KoFamScan
Formaldehyde_assimilation	Ribulose_monophosphate_pathway	hxlB	hxlB; 6-phospho-3-hexuloisomerase [EC:5.3.1.27]	K08094	HMM_DomainScore:101.33	KoFamScan
Formaldehyde_assimilation	Ribulose_monophosphate_pathway	hps-phi	hps-phi; 3-hexulose-6-phosphate synthase / 6-phospho-3-hexuloisomerase [EC:4.1.2.43 5.3.1.27]	K13831	HMM_FullScore:328.57	KoFamScan
Formaldehyde_assimilation	Ribulose_monophosphate_pathway	pfkA, PFK	pfkA, PFK; 6-phosphofructokinase 1 [EC:2.7.1.11]	K00850	HMM_FullScore:368.23	KoFamScan
Formaldehyde_assimilation	Ribulose_monophosphate_pathway	pfkB	pfkB; 6-phosphofructokinase 2 [EC:2.7.1.11]	K16370	HMM_FullScore:315.07	KoFamScan
Formaldehyde_assimilation	Ribulose_monophosphate_pathway	FBA, fbaA	FBA, fbaA; fructose-bisphosphate aldolase, class II [EC:4.1.2.13]	K01624	HMM_FullScore:85.80	KoFamScan
Formaldehyde_assimilation	xylulose_monophosphate_pathway	DAS	DAS; dihydroxyacetone synthase [EC:2.2.1.3]	K17100	HMM_FullScore:898.50	KoFamScan
Formaldehyde_assimilation	xylulose_monophosphate_pathway	DAK, TKFC	DAK, TKFC; triose/dihydroxyacetone kinase / FAD-AMP lyase (cyclizing) [EC:2.7.1.28 2.7.1.29 4.6.1.15]	K00863	HMM_FullScore:531.63	KoFamScan
Formaldehyde_assimilation	xylulose_monophosphate_pathway	FBA, fbaA	FBA, fbaA; fructose-bisphosphate aldolase, class II [EC:4.1.2.13]	K01624	HMM_FullScore:85.80	KoFamScan
Formaldehyde_assimilation	xylulose_monophosphate_pathway	FBP, fbp	FBP, fbp; fructose-1,6-bisphosphatase I [EC:3.1.3.11]	K03841	HMM_FullScore:219.70	KoFamScan
Formaldehyde_assimilation	serine_cycle	K00600	glyA, SHMT; glycine hydroxymethyltransferase [EC:2.1.2.1]	K00600	HMM_FullScore:83.87	KoFamScan
Formaldehyde_assimilation	serine_cycle	K00830	AGXT; alanine-glyoxylate transaminase / serine-glyoxylate transaminase / serine-pyruvate transaminase [EC:2.6.1.44 2.6.1.45 2.6.1.51]	K00830	HMM_FullScore:415.13	KoFamScan
Formaldehyde_assimilation	serine_cycle	K00018	hprA; glycerate dehydrogenase [EC:1.1.1.29]	K00018	HMM_DomainScore:312.93	KoFamScan
Formaldehyde_assimilation	serine_cycle	K11529	gck, gckA, GLYCTK; glycerate 2-kinase [EC:2.7.1.165]	K11529	HMM_FullScore:162.17	KoFamScan
Formaldehyde_assimilation	serine_cycle	K01689	ENO, eno; enolase [EC:4.2.1.11]	K01689	HMM_FullScore:69.30	KoFamScan
Formaldehyde_assimilation	serine_cycle	K01595	ppc; phosphoenolpyruvate carboxylase [EC:4.1.1.31]	K01595	HMM_FullScore:49.03	KoFamScan
Formaldehyde_assimilation	serine_cycle	K00024	mdh; malate dehydrogenase [EC:1.1.1.37]	K00024	HMM_DomainScore:331.37	KoFamScan
Formaldehyde_assimilation	serine_cycle	K08692	mtkB; malate-CoA ligase subunit alpha [EC:6.2.1.9]	K08692	HMM_FullScore:457.70	KoFamScan
Formaldehyde_assimilation	serine_cycle	K14067	mtkA; malate-CoA ligase subunit beta [EC:6.2.1.9]	K14067	HMM_DomainScore:623.60	KoFamScan
Formaldehyde_assimilation	serine_cycle	K08691	mcl; malyl-CoA/(S)-citramalyl-CoA lyase [EC:4.1.3.24 4.1.3.25]	K08691	HMM_DomainScore:382.20	KoFamScan
amino_acids_degradation	arginine_degradation	arcA	arcA; arginine deiminase [EC:3.5.3.6]	K01478	HMM_DomainScore:126.83	KoFamScan
amino_acids_degradation	arginine_degradation	arcC	arcC; carbamate kinase [EC:2.7.2.2]	K00926	HMM_FullScore:102.87	KoFamScan
amino_acids_degradation	arginine_degradation	arcB	arcB; ornithine carbamoyltransferase [EC:2.1.3.3]	K00611	HMM_FullScore:327.60	KoFamScan
amino_acids_degradation	arginine_degradation	arcD	arcD; arginine/ornithine antiporter	K24446	HMM_FullScore:729.03	KoFamScan
amino_acids_degradation	arginine_degradation	arcR	arcR; IclR family transcriptional regulator, arginine deiminase pathway regulator	K21827	HMM_FullScore:302.70	KoFamScan
amino_acids_degradation	asparagine_degradation	ansA	ansA; L-asparaginase [EC:3.5.1.1]	K01424	HMM_FullScore:149.37	KoFamScan
amino_acids_degradation	asparagine_degradation	aspA	aspA; aspartate ammonia-lyase [EC:4.3.1.1]	K01744	HMM_FullScore:661.40	KoFamScan

## Sheet: Data S4
Data S4 | GTDB r226 taxonomy of GTDB r95 genomes analyzed in this study.
Category	Genome accession	Taxonomy in GTDB r95	Taxonomy in GTDB r226
Methylomirabilota	GB_GCA_001771285.1	d__Bacteria;p__Methylomirabilota;c__Methylomirabilia;o__Methylomirabilales;f__2-02-FULL-66-22;g__2-02-FULL-66-22;s__2-02-FULL-66-22 sp001771285	d__Bacteria;p__Methylomirabilota;c__Methylomirabilia;o__Methylomirabilales;f__2-02-FULL-66-22;g__2-02-FULL-66-22;s__2-02-FULL-66-22 sp001771285
Methylomirabilota	GB_GCA_001443495.1	d__Bacteria;p__Methylomirabilota;c__Methylomirabilia;o__Methylomirabilales;f__CSP1-5;g__CSP1-5;s__CSP1-5 sp001443495	d__Bacteria;p__Methylomirabilota;c__Methylomirabilia;o__Methylomirabilales;f__CSP1-5;g__CSP1-5;s__CSP1-5 sp001443495
Methylomirabilota	GB_GCA_001643535.1	d__Bacteria;p__Methylomirabilota;c__Methylomirabilia;o__Methylomirabilales;f__CSP1-5;g__CSP1-5;s__CSP1-5 sp001643535	d__Bacteria;p__Methylomirabilota;c__Methylomirabilia;o__Methylomirabilales;f__CSP1-5;g__CSP1-5;s__CSP1-5 sp001643535
Methylomirabilota	RS_GCF_003044035.1	d__Bacteria;p__Methylomirabilota;c__Methylomirabilia;o__Methylomirabilales;f__Methylomirabilaceae;g__Methylomirabilis;s__Methylomirabilis limnetica	d__Bacteria;p__Methylomirabilota;c__Methylomirabilia;o__Methylomirabilales;f__Methylomirabilaceae;g__Methylomirabilis;s__Methylomirabilis limnetica
Methylomirabilota	GB_GCA_002632385.1	d__Bacteria;p__Methylomirabilota;c__Methylomirabilia;o__Methylomirabilales;f__Methylomirabilaceae;g__Methylomirabilis;s__Methylomirabilis oxyfera_A	d__Bacteria;p__Methylomirabilota;c__Methylomirabilia;o__Methylomirabilales;f__Methylomirabilaceae;g__Methylomirabilis;s__Methylomirabilis lanthanidiphila
Methylomirabilota	GB_GCA_000091165.1	d__Bacteria;p__Methylomirabilota;c__Methylomirabilia;o__Methylomirabilales;f__Methylomirabilaceae;g__Methylomirabilis;s__Methylomirabilis oxyfera_B	d__Bacteria;p__Methylomirabilota;c__Methylomirabilia;o__Methylomirabilales;f__Methylomirabilaceae;g__Methylomirabilis;s__Methylomirabilis oxygeniifera
Methylomirabilota	GB_GCA_002634395.1	d__Bacteria;p__Methylomirabilota;c__Methylomirabilia;o__Methylomirabilales;f__Methylomirabilaceae;g__Methylomirabilis;s__Methylomirabilis sp002634395	d__Bacteria;p__Methylomirabilota;c__Methylomirabilia;o__Methylomirabilales;f__Methylomirabilaceae;g__Methylomirabilis;s__Methylomirabilis tolerans
Methylomirabilota	GB_GCA_003104975.1	d__Bacteria;p__Methylomirabilota;c__Methylomirabilia;o__Methylomirabilales;f__Methylomirabilaceae;g__Methylomirabilis;s__Methylomirabilis sp003104975	d__Bacteria;p__Methylomirabilota;c__Methylomirabilia;o__Methylomirabilales;f__Methylomirabilaceae;g__Methylomirabilis;s__Methylomirabilis sp003104975
Methylomirabilota	GB_GCA_003105305.1	d__Bacteria;p__Methylomirabilota;c__Methylomirabilia;o__Methylomirabilales;f__Methylomirabilaceae;g__Methylomirabilis;s__Methylomirabilis sp003105305	d__Bacteria;p__Methylomirabilota;c__Methylomirabilia;o__Methylomirabilales;f__Methylomirabilaceae;g__Methylomirabilis;s__Methylomirabilis sp003105305
Methylomirabilota	GB_GCA_001443385.1	d__Bacteria;p__Methylomirabilota;c__Methylomirabilia;o__Rokubacteriales;f__CSP1-6;g__CSP1-6;s__CSP1-6 sp001443385	d__Bacteria;p__Methylomirabilota;c__Methylomirabilia;o__Rokubacteriales;f__CSP1-6;g__CSP1-6;s__CSP1-6 sp001443385
Methylomirabilota	GB_GCA_001914535.1	d__Bacteria;p__Methylomirabilota;c__Methylomirabilia;o__Rokubacteriales;f__GWA2-73-35;g__20CM-2-70-11;s__20CM-2-70-11 sp001914535	d__Bacteria;p__Methylomirabilota;c__Methylomirabilia;o__Rokubacteriales;f__CSP1-6;g__20CM-2-70-11;s__20CM-2-70-11 sp001914535
Methylomirabilota	GB_GCA_003220315.1	d__Bacteria;p__Methylomirabilota;c__Methylomirabilia;o__Rokubacteriales;f__GWA2-73-35;g__20CM-2-70-11;s__20CM-2-70-11 sp003220315	d__Bacteria;p__Methylomirabilota;c__Methylomirabilia;o__Rokubacteriales;f__CSP1-6;g__20CM-2-70-11;s__20CM-2-70-11 sp003220315
Methylomirabilota	GB_GCA_003220675.1	d__Bacteria;p__Methylomirabilota;c__Methylomirabilia;o__Rokubacteriales;f__GWA2-73-35;g__20CM-2-70-11;s__20CM-2-70-11 sp003220675	d__Bacteria;p__Methylomirabilota;c__Methylomirabilia;o__Rokubacteriales;f__CSP1-6;g__20CM-2-70-11;s__20CM-2-70-11 sp003220675
Methylomirabilota	GB_GCA_003221695.1	d__Bacteria;p__Methylomirabilota;c__Methylomirabilia;o__Rokubacteriales;f__GWA2-73-35;g__20CM-2-70-11;s__20CM-2-70-11 sp003221695	d__Bacteria;p__Methylomirabilota;c__Methylomirabilia;o__Rokubacteriales;f__CSP1-6;g__20CM-2-70-11;s__20CM-2-70-11 sp003221695
Methylomirabilota	GB_GCA_001917535.1	d__Bacteria;p__Methylomirabilota;c__Methylomirabilia;o__Rokubacteriales;f__GWA2-73-35;g__40CM-4-69-5;s__40CM-4-69-5 sp001917535	d__Bacteria;p__Methylomirabilota;c__Methylomirabilia;o__Rokubacteriales;f__CSP1-6;g__40CM-4-69-5;s__40CM-4-69-5 sp001917535
Methylomirabilota	GB_GCA_001917585.1	d__Bacteria;p__Methylomirabilota;c__Methylomirabilia;o__Rokubacteriales;f__GWA2-73-35;g__40CM-68-15;s__40CM-68-15 sp001917585	d__Bacteria;p__Methylomirabilota;c__Methylomirabilia;o__Rokubacteriales;f__CSP1-6;g__40CM-68-15;s__40CM-68-15 sp001917585
Methylomirabilota	GB_GCA_003220615.1	d__Bacteria;p__Methylomirabilota;c__Methylomirabilia;o__Rokubacteriales;f__GWA2-73-35;g__40CM-68-15;s__40CM-68-15 sp003220615	d__Bacteria;p__Methylomirabilota;c__Methylomirabilia;o__Rokubacteriales;f__CSP1-6;g__40CM-68-15;s__40CM-68-15 sp003220615
Methylomirabilota	GB_GCA_003220225.1	d__Bacteria;p__Methylomirabilota;c__Methylomirabilia;o__Rokubacteriales;f__GWA2-73-35;g__AR12;s__AR12 sp003220225	d__Bacteria;p__Methylomirabilota;c__Methylomirabilia;o__Rokubacteriales;f__CSP1-6;g__AR12;s__AR12 sp003220225
Methylomirabilota	GB_GCA_003220335.1	d__Bacteria;p__Methylomirabilota;c__Methylomirabilia;o__Rokubacteriales;f__GWA2-73-35;g__AR12;s__AR12 sp003220335	d__Bacteria;p__Methylomirabilota;c__Methylomirabilia;o__Rokubacteriales;f__CSP1-6;g__AR12;s__AR12 sp003220335
Methylomirabilota	GB_GCA_003220475.1	d__Bacteria;p__Methylomirabilota;c__Methylomirabilia;o__Rokubacteriales;f__GWA2-73-35;g__AR12;s__AR12 sp003220475	d__Bacteria;p__Methylomirabilota;c__Methylomirabilia;o__Rokubacteriales;f__CSP1-6;g__AR12;s__AR12 sp003220475
Methylomirabilota	GB_GCA_003220595.1	d__Bacteria;p__Methylomirabilota;c__Methylomirabilia;o__Rokubacteriales;f__GWA2-73-35;g__AR19;s__AR19 sp003220595	d__Bacteria;p__Methylomirabilota;c__Methylomirabilia;o__Rokubacteriales;f__CSP1-6;g__AR19;s__AR19 sp003220595
Methylomirabilota	GB_GCA_003220435.1	d__Bacteria;p__Methylomirabilota;c__Methylomirabilia;o__Rokubacteriales;f__GWA2-73-35;g__AR31;s__AR31 sp003220435	d__Bacteria;p__Methylomirabilota;c__Methylomirabilia;o__Rokubacteriales;f__CSP1-6;g__AR31;s__AR31 sp003220435
Methylomirabilota	GB_GCA_003220495.1	d__Bacteria;p__Methylomirabilota;c__Methylomirabilia;o__Rokubacteriales;f__GWA2-73-35;g__AR31;s__AR31 sp003220495	d__Bacteria;p__Methylomirabilota;c__Methylomirabilia;o__Rokubacteriales;f__CSP1-6;g__AR31;s__AR31 sp003220495
Methylomirabilota	GB_GCA_003220535.1	d__Bacteria;p__Methylomirabilota;c__Methylomirabilia;o__Rokubacteriales;f__GWA2-73-35;g__AR31;s__AR31 sp003220535	d__Bacteria;p__Methylomirabilota;c__Methylomirabilia;o__Rokubacteriales;f__CSP1-6;g__AR31;s__AR31 sp003220535
Methylomirabilota	GB_GCA_003220685.1	d__Bacteria;p__Methylomirabilota;c__Methylomirabilia;o__Rokubacteriales;f__GWA2-73-35;g__AR31;s__AR31 sp003220685	d__Bacteria;p__Methylomirabilota;c__Methylomirabilia;o__Rokubacteriales;f__CSP1-6;g__AR31;s__AR31 sp003220685
Methylomirabilota	GB_GCA_003221515.1	d__Bacteria;p__Methylomirabilota;c__Methylomirabilia;o__Rokubacteriales;f__GWA2-73-35;g__AR31;s__AR31 sp003221515	d__Bacteria;p__Methylomirabilota;c__Methylomirabilia;o__Rokubacteriales;f__CSP1-6;g__AR31;s__AR31 sp003221515
Methylomirabilota	GB_GCA_003221595.1	d__Bacteria;p__Methylomirabilota;c__Methylomirabilia;o__Rokubacteriales;f__GWA2-73-35;g__AR31;s__AR31 sp003221595	d__Bacteria;p__Methylomirabilota;c__Methylomirabilia;o__Rokubacteriales;f__CSP1-6;g__AR31;s__AR31 sp003221595
Methylomirabilota	GB_GCA_003221615.1	d__Bacteria;p__Methylomirabilota;c__Methylomirabilia;o__Rokubacteriales;f__GWA2-73-35;g__AR31;s__AR31 sp003221615	d__Bacteria;p__Methylomirabilota;c__Methylomirabilia;o__Rokubacteriales;f__CSP1-6;g__AR31;s__AR31 sp003221615
Methylomirabilota	GB_GCA_003221635.1	d__Bacteria;p__Methylomirabilota;c__Methylomirabilia;o__Rokubacteriales;f__GWA2-73-35;g__AR31;s__AR31 sp003221635	d__Bacteria;p__Methylomirabilota;c__Methylomirabilia;o__Rokubacteriales;f__CSP1-6;g__AR31;s__AR31 sp003221635
Methylomirabilota	GB_GCA_003221655.1	d__Bacteria;p__Methylomirabilota;c__Methylomirabilia;o__Rokubacteriales;f__GWA2-73-35;g__AR31;s__AR31 sp003221655	d__Bacteria;p__Methylomirabilota;c__Methylomirabilia;o__Rokubacteriales;f__CSP1-6;g__AR31;s__AR31 sp003221655
Methylomirabilota	GB_GCA_003220345.1	d__Bacteria;p__Methylomirabilota;c__Methylomirabilia;o__Rokubacteriales;f__GWA2-73-35;g__AR37;s__AR37 sp003220345	d__Bacteria;p__Methylomirabilota;c__Methylomirabilia;o__Rokubacteriales;f__CSP1-6;g__AR37;s__AR37 sp003220345
Methylomirabilota	GB_GCA_003221455.1	d__Bacteria;p__Methylomirabilota;c__Methylomirabilia;o__Rokubacteriales;f__GWA2-73-35;g__AR44;s__AR44 sp003221455	d__Bacteria;p__Methylomirabilota;c__Methylomirabilia;o__Rokubacteriales;f__CSP1-6;g__AR9;s__AR9 sp003221455
Methylomirabilota	GB_GCA_003220265.1	d__Bacteria;p__Methylomirabilota;c__Methylomirabilia;o__Rokubacteriales;f__GWA2-73-35;g__AR5;s__AR5 sp003220265	d__Bacteria;p__Methylomirabilota;c__Methylomirabilia;o__Rokubacteriales;f__CSP1-6;g__AR5;s__AR5 sp003220265
Methylomirabilota	GB_GCA_005887895.1	d__Bacteria;p__Methylomirabilota;c__Methylomirabilia;o__Rokubacteriales;f__GWA2-73-35;g__AR5;s__AR5 sp005887895	d__Bacteria;p__Methylomirabilota;c__Methylomirabilia;o__Rokubacteriales;f__CSP1-6;g__AR5;s__AR5 sp005887895
Methylomirabilota	GB_GCA_003220195.1	d__Bacteria;p__Methylomirabilota;c__Methylomirabilia;o__Rokubacteriales;f__GWA2-73-35;g__AR8;s__AR8 sp003220195	d__Bacteria;p__Methylomirabilota;c__Methylomirabilia;o__Rokubacteriales;f__CSP1-6;g__AR8;s__AR8 sp003220195
Methylomirabilota	GB_GCA_003221435.1	d__Bacteria;p__Methylomirabilota;c__Methylomirabilia;o__Rokubacteriales;f__GWA2-73-35;g__AR9;s__AR9 sp003221435	d__Bacteria;p__Methylomirabilota;c__Methylomirabilia;o__Rokubacteriales;f__CSP1-6;g__AR9;s__AR9 sp003221435
Methylomirabilota	GB_GCA_001788495.1	d__Bacteria;p__Methylomirabilota;c__Methylomirabilia;o__Rokubacteriales;f__GWA2-73-35;g__GWA2-73-35;s__GWA2-73-35 sp001788495	d__Bacteria;p__Methylomirabilota;c__Methylomirabilia;o__Rokubacteriales;f__CSP1-6;g__GWA2-73-35;s__GWA2-73-35 sp001788495
Methylomirabilota	GB_GCA_001790205.1	d__Bacteria;p__Methylomirabilota;c__Methylomirabilia;o__Rokubacteriales;f__GWA2-73-35;g__GWA2-73-35;s__GWA2-73-35 sp001790205	d__Bacteria;p__Methylomirabilota;c__Methylomirabilia;o__Rokubacteriales;f__CSP1-6;g__GWA2-73-35;s__GWA2-73-35 sp001790205
Methylomirabilota	GB_GCA_001790315.1	d__Bacteria;p__Methylomirabilota;c__Methylomirabilia;o__Rokubacteriales;f__GWA2-73-35;g__GWA2-73-35;s__GWA2-73-35 sp001790315	d__Bacteria;p__Methylomirabilota;c__Methylomirabilia;o__Rokubacteriales;f__CSP1-6;g__GWA2-73-35;s__GWA2-73-35 sp001790315
Methylomirabilota	GB_GCA_001788395.1	d__Bacteria;p__Methylomirabilota;c__Methylomirabilia;o__Rokubacteriales;f__GWA2-73-35;g__UBA12499;s__UBA12499 sp001788395	d__Bacteria;p__Methylomirabilota;c__Methylomirabilia;o__Rokubacteriales;f__CSP1-6;g__UBA12499;s__UBA12499 sp001788395
Methylomirabilota	GB_GCA_001788415.1	d__Bacteria;p__Methylomirabilota;c__Methylomirabilia;o__Rokubacteriales;f__GWA2-73-35;g__UBA12499;s__UBA12499 sp001788415	d__Bacteria;p__Methylomirabilota;c__Methylomirabilia;o__Rokubacteriales;f__CSP1-6;g__UBA12499;s__UBA12499 sp001788415
Vulcanimicrobiota (Eremiobacterota)	GB_GCA_003244105.1	d__Bacteria;p__Eremiobacterota;c__Eremiobacteria;o__Eremiobacterales;f__Eremiobacteraceae;g__Eremiobacter;s__Eremiobacter sp003244105	d__Bacteria;p__Vulcanimicrobiota;c__Vulcanimicrobiia;o__Eremiobacterales;f__Eremiobacteraceae;g__Eremiobacter;s__Eremiobacter antarcticus
Vulcanimicrobiota (Eremiobacterota)	GB_GCA_004297985.1	d__Bacteria;p__Eremiobacterota;c__Eremiobacteria;o__UBP12;f__SCRA01;g__SCRA01;s__SCRA01 sp004297985	d__Bacteria;p__Vulcanimicrobiota;c__Vulcanimicrobiia;o__Vulcanimicrobiales;f__SCRA01;g__SCRA01;s__SCRA01 sp004297985
Vulcanimicrobiota (Eremiobacterota)	GB_GCA_004298665.1	d__Bacteria;p__Eremiobacterota;c__Eremiobacteria;o__UBP12;f__SCRA01;g__SCRA01;s__SCRA01 sp004298665	d__Bacteria;p__Vulcanimicrobiota;c__Vulcanimicrobiia;o__Vulcanimicrobiales;f__SCRA01;g__SCRA01;s__SCRA01 sp004298665
Vulcanimicrobiota (Eremiobacterota)	GB_GCA_004298675.1	d__Bacteria;p__Eremiobacterota;c__Eremiobacteria;o__UBP12;f__SCRA01;g__SCRA01;s__SCRA01 sp004298675	d__Bacteria;p__Vulcanimicrobiota;c__Vulcanimicrobiia;o__Vulcanimicrobiales;f__SCRA01;g__SCRA01;s__SCRA01 sp004298675
Vulcanimicrobiota (Eremiobacterota)	GB_GCA_003136655.1	d__Bacteria;p__Eremiobacterota;c__Eremiobacteria;o__UBP12;f__UBA5184;g__Bog-1492;s__Bog-1492 sp003136655	d__Bacteria;p__Vulcanimicrobiota;c__Vulcanimicrobiia;o__Vulcanimicrobiales;f__Vulcanimicrobiaceae;g__Hesperobacter;s__Hesperobacter lustricola
Vulcanimicrobiota (Eremiobacterota)	GB_GCA_003134035.1	d__Bacteria;p__Eremiobacterota;c__Eremiobacteria;o__UBP12;f__UBA5184;g__BOG-1502;s__BOG-1502 sp003134035	d__Bacteria;p__Vulcanimicrobiota;c__Vulcanimicrobiia;o__Vulcanimicrobiales;f__Vulcanimicrobiaceae;g__Velthaea;s__Velthaea versatilis
Vulcanimicrobiota (Eremiobacterota)	GB_GCA_003164045.1	d__Bacteria;p__Eremiobacterota;c__Eremiobacteria;o__UBP12;f__UBA5184;g__Bog-1524;s__Bog-1524 sp003164045	d__Bacteria;p__Vulcanimicrobiota;c__Vulcanimicrobiia;o__Vulcanimicrobiales;f__Vulcanimicrobiaceae;g__Lustribacter;s__Lustribacter telmatis
Vulcanimicrobiota (Eremiobacterota)	GB_GCA_003164495.1	d__Bacteria;p__Eremiobacterota;c__Eremiobacteria;o__UBP12;f__UBA5184;g__Bog-1524;s__Bog-1524 sp003164495	d__Bacteria;p__Vulcanimicrobiota;c__Vulcanimicrobiia;o__Vulcanimicrobiales;f__Vulcanimicrobiaceae;g__Lustribacter;s__Lustribacter caenicola
Vulcanimicrobiota (Eremiobacterota)	GB_GCA_003155175.1	d__Bacteria;p__Eremiobacterota;c__Eremiobacteria;o__UBP12;f__UBA5184;g__Bog-1527;s__Bog-1527 sp003155175	d__Bacteria;p__Vulcanimicrobiota;c__Vulcanimicrobiia;o__Vulcanimicrobiales;f__Vulcanimicrobiaceae;g__Hemerobacter;s__Hemerobacter limicola
Vulcanimicrobiota (Eremiobacterota)	GB_GCA_003136355.1	d__Bacteria;p__Eremiobacterota;c__Eremiobacteria;o__UBP12;f__UBA5184;g__Fen-1528;s__Fen-1528 sp003136355	d__Bacteria;p__Vulcanimicrobiota;c__Vulcanimicrobiia;o__Vulcanimicrobiales;f__Vulcanimicrobiaceae;g__Rubrimentiphilum;s__Rubrimentiphilum sp003136355
Vulcanimicrobiota (Eremiobacterota)	GB_GCA_003140855.1	d__Bacteria;p__Eremiobacterota;c__Eremiobacteria;o__UBP12;f__UBA5184;g__Fen-1528;s__Fen-1528 sp003140855	d__Bacteria;p__Vulcanimicrobiota;c__Vulcanimicrobiia;o__Vulcanimicrobiales;f__Vulcanimicrobiaceae;g__Rubrimentiphilum;s__Rubrimentiphilum sp003140855
Vulcanimicrobiota (Eremiobacterota)	GB_GCA_003151115.1	d__Bacteria;p__Eremiobacterota;c__Eremiobacteria;o__UBP12;f__UBA5184;g__Fen-1528;s__Fen-1528 sp003151115	d__Bacteria;p__Vulcanimicrobiota;c__Vulcanimicrobiia;o__Vulcanimicrobiales;f__Vulcanimicrobiaceae;g__Rubrimentiphilum;s__Rubrimentiphilum sp003151115
Vulcanimicrobiota (Eremiobacterota)	GB_GCA_003140215.1	d__Bacteria;p__Eremiobacterota;c__Eremiobacteria;o__UBP12;f__UBA5184;g__Palsa-1478;s__Palsa-1478 sp003140215	d__Bacteria;p__Vulcanimicrobiota;c__Vulcanimicrobiia;o__Vulcanimicrobiales;f__Vulcanimicrobiaceae;g__Vulcanimicrobium;s__Vulcanimicrobium beijerinckii
Vulcanimicrobiota (Eremiobacterota)	GB_GCA_003161435.1	d__Bacteria;p__Eremiobacterota;c__Eremiobacteria;o__UBP12;f__UBA5184;g__Palsa-1478;s__Palsa-1478 sp003161435	d__Bacteria;p__Vulcanimicrobiota;c__Vulcanimicrobiia;o__Vulcanimicrobiales;f__Vulcanimicrobiaceae;g__Vulcanimicrobium;s__Vulcanimicrobium pasteuri
Vulcanimicrobiota (Eremiobacterota)	GB_GCA_003161555.1	d__Bacteria;p__Eremiobacterota;c__Eremiobacteria;o__UBP12;f__UBA5184;g__Palsa-1478;s__Palsa-1478 sp003161555	d__Bacteria;p__Vulcanimicrobiota;c__Vulcanimicrobiia;o__Vulcanimicrobiales;f__Vulcanimicrobiaceae;g__Vulcanimicrobium;s__Vulcanimicrobium vanleeuwenhoeki
Vulcanimicrobiota (Eremiobacterota)	GB_GCA_003168375.1	d__Bacteria;p__Eremiobacterota;c__Eremiobacteria;o__UBP12;f__UBA5184;g__Palsa-1478;s__Palsa-1478 sp003168375	d__Bacteria;p__Vulcanimicrobiota;c__Vulcanimicrobiia;o__Vulcanimicrobiales;f__Vulcanimicrobiaceae;g__Vulcanimicrobium;s__Vulcanimicrobium winogradskyi
Vulcanimicrobiota (Eremiobacterota)	GB_GCA_003133185.1	d__Bacteria;p__Eremiobacterota;c__Eremiobacteria;o__UBP12;f__UBA5184;g__Palsa-1483;s__Palsa-1483 sp003133185	d__Bacteria;p__Vulcanimicrobiota;c__Vulcanimicrobiia;o__Vulcanimicrobiales;f__Vulcanimicrobiaceae;g__Cybelea;s__Cybelea tyrphae
Vulcanimicrobiota (Eremiobacterota)	GB_GCA_003158175.1	d__Bacteria;p__Eremiobacterota;c__Eremiobacteria;o__UBP12;f__UBA5184;g__Palsa-1483;s__Palsa-1483 sp003158175	d__Bacteria;p__Vulcanimicrobiota;c__Vulcanimicrobiia;o__Vulcanimicrobiales;f__Vulcanimicrobiaceae;g__Cybelea;s__Cybelea septentrionalis
Vulcanimicrobiota (Eremiobacterota)	GB_GCA_003166915.1	d__Bacteria;p__Eremiobacterota;c__Eremiobacteria;o__UBP12;f__UBA5184;g__Palsa-1483;s__Palsa-1483 sp003166915	d__Bacteria;p__Vulcanimicrobiota;c__Vulcanimicrobiia;o__Vulcanimicrobiales;f__Vulcanimicrobiaceae;g__Cybelea;s__Cybelea palsarum
Vulcanimicrobiota (Eremiobacterota)	GB_GCA_003167155.1	d__Bacteria;p__Eremiobacterota;c__Eremiobacteria;o__UBP12;f__UBA5184;g__Palsa-1483;s__Palsa-1483 sp003167155	d__Bacteria;p__Vulcanimicrobiota;c__Vulcanimicrobiia;o__Vulcanimicrobiales;f__Vulcanimicrobiaceae;g__Cybelea;s__Cybelea tumulisoli
Vulcanimicrobiota (Eremiobacterota)	GB_GCA_003167055.1	d__Bacteria;p__Eremiobacterota;c__Eremiobacteria;o__UBP12;f__UBA5184;g__PALSA-1484;s__PALSA-1484 sp003167055	d__Bacteria;p__Vulcanimicrobiota;c__Vulcanimicrobiia;o__Vulcanimicrobiales;f__Vulcanimicrobiaceae;g__Aquilonibacter;s__Aquilonibacter stordalenmirensis
Vulcanimicrobiota (Eremiobacterota)	GB_GCA_003136895.1	d__Bacteria;p__Eremiobacterota;c__Eremiobacteria;o__UBP12;f__UBA5184;g__PALSA-1495;s__PALSA-1495 sp003136895	d__Bacteria;p__Vulcanimicrobiota;c__Vulcanimicrobiia;o__Vulcanimicrobiales;f__Vulcanimicrobiaceae;g__Erabacter;s__Erabacter solicola
Vulcanimicrobiota (Eremiobacterota)	GB_GCA_003133745.1	d__Bacteria;p__Eremiobacterota;c__Eremiobacteria;o__UBP12;f__UBA5184;g__PALSA-1504;s__PALSA-1504 sp003133745	d__Bacteria;p__Vulcanimicrobiota;c__Vulcanimicrobiia;o__Vulcanimicrobiales;f__Vulcanimicrobiaceae;g__Tyrphobacter;s__Tyrphobacter aquilonaris
Vulcanimicrobiota (Eremiobacterota)	GB_GCA_003158195.1	d__Bacteria;p__Eremiobacterota;c__Eremiobacteria;o__UBP12;f__UBA5184;g__Palsa-1515;s__Palsa-1515 sp003158195	d__Bacteria;p__Vulcanimicrobiota;c__Vulcanimicrobiia;o__Vulcanimicrobiales;f__Vulcanimicrobiaceae;g__Palsibacter;s__Palsibacter borealis
Vulcanimicrobiota (Eremiobacterota)	GB_GCA_003156715.1	d__Bacteria;p__Eremiobacterota;c__Eremiobacteria;o__UBP12;f__UBA5184;g__PALSA-1516;s__PALSA-1516 sp003156715	d__Bacteria;p__Vulcanimicrobiota;c__Vulcanimicrobiia;o__Vulcanimicrobiales;f__Vulcanimicrobiaceae;g__Tityobacter;s__Tityobacter terrigena
Vulcanimicrobiota (Eremiobacterota)	GB_GCA_003140835.1	d__Bacteria;p__Eremiobacterota;c__Eremiobacteria;o__UBP12;f__UBA5184;g__PALSA-1529;s__PALSA-1529 sp003140835	d__Bacteria;p__Vulcanimicrobiota;c__Vulcanimicrobiia;o__Vulcanimicrobiales;f__Vulcanimicrobiaceae;g__Tumulicola;s__Tumulicola scandinaviensis
Vulcanimicrobiota (Eremiobacterota)	GB_GCA_003243975.1	d__Bacteria;p__Eremiobacterota;c__Eremiobacteria;o__UBP12;f__UBA5184;g__QHBJ01;s__QHBJ01 sp003243975	d__Bacteria;p__Vulcanimicrobiota;c__Vulcanimicrobiia;o__Vulcanimicrobiales;f__Vulcanimicrobiaceae;g__Meridianibacter;s__Meridianibacter frigidus
Vulcanimicrobiota (Eremiobacterota)	GB_GCA_002413145.1	d__Bacteria;p__Eremiobacterota;c__Eremiobacteria;o__UBP12;f__UBA5184;g__UBA5184;s__UBA5184 sp002413145	d__Bacteria;p__Vulcanimicrobiota;c__Vulcanimicrobiia;o__Vulcanimicrobiales;f__Vulcanimicrobiaceae;g__Zemelea;s__Zemelea sp002413145
Vulcanimicrobiota (Eremiobacterota)	GB_GCA_003134695.1	d__Bacteria;p__Eremiobacterota;c__Eremiobacteria;o__UBP12;f__UBA5184;g__UBA5184;s__UBA5184 sp003134695	d__Bacteria;p__Vulcanimicrobiota;c__Vulcanimicrobiia;o__Vulcanimicrobiales;f__Vulcanimicrobiaceae;g__Zemelea;s__Zemelea palustris
Vulcanimicrobiota (Eremiobacterota)	GB_GCA_002329445.1	d__Bacteria;p__Eremiobacterota;c__UBP9;o__UBA4705;f__UBA4705;g__UBA1432;s__UBA1432 sp002329445	d__Bacteria;p__Vulcanimicrobiota;c__Xenobia;o__Xenobiales;f__Xenobiaceae;g__Xenobium;s__Xenobium purgamenti
Vulcanimicrobiota (Eremiobacterota)	GB_GCA_002423485.1	d__Bacteria;p__Eremiobacterota;c__UBP9;o__UBA4705;f__UBA4705;g__UBA1432;s__UBA1432 sp002423485	d__Bacteria;p__Vulcanimicrobiota;c__Xenobia;o__Xenobiales;f__Xenobiaceae;g__Xenobium;s__Xenobium occultum
Vulcanimicrobiota (Eremiobacterota)	GB_GCA_002407045.1	d__Bacteria;p__Eremiobacterota;c__UBP9;o__UBA4705;f__UBA4705;g__UBA4705;s__UBA4705 sp002407045	d__Bacteria;p__Vulcanimicrobiota;c__Xenobia;o__Xenobiales;f__Xenobiaceae;g__Bruticola;s__Bruticola papionis
Vulcanimicrobiota (Eremiobacterota)	GB_GCA_004554425.1	d__Bacteria;p__Eremiobacterota;c__UBP9;o__UBA4705;f__UBA4705;g__UBA4705;s__UBA4705 sp004554425	d__Bacteria;p__Vulcanimicrobiota;c__Xenobia;o__Xenobiales;f__Xenobiaceae;g__Bruticola;s__Bruticola sp004554425
Vulcanimicrobiota (Eremiobacterota)	GB_GCA_900313515.1	d__Bacteria;p__Eremiobacterota;c__UBP9;o__UBA4705;f__UBA4705;g__UBA4705;s__UBA4705 sp900313515	d__Bacteria;p__Vulcanimicrobiota;c__Xenobia;o__Xenobiales;f__Xenobiaceae;g__Bruticola;s__Bruticola sp900313515
Zhuqueibacterota (KSB1)	GB_GCA_002085355.1	d__Bacteria;p__KSB1;c__UBA2214;o__AABM5-25-91;f__AABM5-25-91;g__4484-87;s__4484-87 sp002085355	d__Bacteria;p__Zhuqueibacterota;c__Zhuqueibacteria;o__Thermofontimicrobiales;f__Thermofontimicrobiaceae;g__4484-87;s__4484-87 sp002085355
Zhuqueibacterota (KSB1)	GB_GCA_002084535.1	d__Bacteria;p__KSB1;c__UBA2214;o__AABM5-25-91;f__AABM5-25-91;g__NBLI01;s__NBLI01 sp002084535	d__Bacteria;p__Zhuqueibacterota;c__Zhuqueibacteria;o__Thermofontimicrobiales;f__Thermofontimicrobiaceae;g__NBLI01;s__NBLI01 sp002084535
Zhuqueibacterota (KSB1)	GB_GCA_004357015.1	d__Bacteria;p__KSB1;c__UBA2214;o__CR04bin15;f__CR04bin15;g__CR04bin15;s__CR04bin15 sp004357015	d__Bacteria;p__Zhuqueibacterota;c__Zhuqueibacteria;o__Oceanimicrobiales;f__Oceanimicrobiaceae;g__CR04bin15;s__CR04bin15 sp004357015
Zhuqueibacterota (KSB1)	GB_GCA_004356825.1	d__Bacteria;p__KSB1;c__UBA2214;o__CR04bin15;f__CR04bin15;g__N075bin58;s__N075bin58 sp004356825	d__Bacteria;p__Zhuqueibacterota;c__Zhuqueibacteria;o__Oceanimicrobiales;f__Oceanimicrobiaceae;g__Oceanimicrobium;s__Oceanimicrobium pacificum
Zhuqueibacterota (KSB1)	GB_GCA_003576975.1	d__Bacteria;p__KSB1;c__UBA2214;o__CR04bin15;f__QEVD01;g__QEVD01;s__QEVD01 sp003576975	d__Bacteria;p__Zhuqueibacterota;c__Zhuqueibacteria;o__Zhuqueibacterales;f__Zhuqueibacteraceae;g__Coneutiohabitans;s__Coneutiohabitans sp003576975
Zhuqueibacterota (KSB1)	GB_GCA_002085035.1	d__Bacteria;p__KSB1;c__UBA2214;o__JdFR-76;f__4484-219;g__4484-219;s__4484-219 sp002085035	d__Bacteria;p__Zhuqueibacterota;c__JdFR-76;o__JdFR-76;f__4484-219;g__4484-219;s__4484-219 sp002085035
Zhuqueibacterota (KSB1)	GB_GCA_003645965.1	d__Bacteria;p__KSB1;c__UBA2214;o__JdFR-76;f__4484-219;g__4484-219;s__4484-219 sp003645965	d__Bacteria;p__Zhuqueibacterota;c__JdFR-76;o__JdFR-76;f__4484-219;g__4484-219;s__4484-219 sp002085035
Zhuqueibacterota (KSB1)	GB_GCA_002898015.1	d__Bacteria;p__KSB1;c__UBA2214;o__JdFR-76;f__BMS3Abin05;g__BMS3Abin05;s__BMS3Abin05 sp002898015	d__Bacteria;p__Zhuqueibacterota;c__JdFR-76;o__JdFR-76;f__BMS3Abin05;g__BMS3Abin05;s__BMS3Abin05 sp002898015
Zhuqueibacterota (KSB1)	GB_GCA_002011685.1	d__Bacteria;p__KSB1;c__UBA2214;o__JdFR-76;f__JdFR-76;g__JdFR-76;s__JdFR-76 sp002011685	d__Bacteria;p__Zhuqueibacterota;c__JdFR-76;o__JdFR-76;f__JdFR-76;g__JdFR-76;s__JdFR-76 sp002011685
Zhuqueibacterota (KSB1)	GB_GCA_002327255.1	d__Bacteria;p__KSB1;c__UBA2214;o__UBA2214;f__UBA2214;g__UBA2214;s__UBA2214 sp002327255	d__Bacteria;p__Zhuqueibacterota;c__Zhuqueibacteria;o__Residuimicrobiales;f__Residuimicrobiaceae;g__Residuimicrobium;s__Residuimicrobium suncorense
Zhuqueibacterota (KSB1)	GB_GCA_003818595.1	d__Bacteria;p__KSB1;c__UBA2214;o__UBA2214;f__Zgenome-0027;g__RPQV01;s__RPQV01 sp003818595	d__Bacteria;p__Zhuqueibacterota;c__Zhuqueibacteria;o__Residuimicrobiales;f__Krinioviventaceae;g__Fontimicrobium;s__Fontimicrobium primus
Zhuqueibacterota (KSB1)	GB_GCA_003854975.1	d__Bacteria;p__KSB1;c__UBA2214;o__UBA2214;f__Zgenome-0027;g__Zgenome-0027;s__Zgenome-0027 sp003854975
Zhuqueibacterota (KSB1)	GB_GCA_003854995.1	d__Bacteria;p__KSB1;c__UBA2214;o__UBA2214;f__Zgenome-0027;g__Zgenome-0027;s__Zgenome-0027 sp003854995	d__Bacteria;p__Zhuqueibacterota;c__Zhuqueibacteria;o__Residuimicrobiales;f__Krinioviventaceae;g__Kriniovivens;s__Kriniovivens sp003854995
Chloroflexota	GB_GCA_002699125.1	d__Bacteria;p__Chloroflexota;c__Anaerolineae;o__Promineofilales;f__Promineofilaceae;g__GCA-2699125;s__GCA-2699125 sp002699125	d__Bacteria;p__Chloroflexota;c__Anaerolineae;o__Promineifilales;f__Promineifilaceae;g__Leptofilum;s__Leptofilum sp002699125
Chloroflexota	GB_GCA_002699585.1	d__Bacteria;p__Chloroflexota;c__Anaerolineae;o__SBR1031;f__A4b;g__GCA-2699585;s__GCA-2699585 sp002699585	d__Bacteria;p__Chloroflexota;c__Anaerolineae;o__Aggregatilineales;f__Phototrophicaceae;g__Phototrophicus;s__Phototrophicus sp002699585
Chloroflexota	GB_GCA_001567085.1	d__Bacteria;p__Chloroflexota;c__Anaerolineae;o__SBR1031;f__A4b;g__OLB15;s__OLB15 sp001567085	d__Bacteria;p__Chloroflexota;c__Anaerolineae;o__Aggregatilineales;f__Phototrophicaceae;g__Flexifilum;s__Flexifilum sp001567085
Chloroflexota	GB_GCA_002717465.1	d__Bacteria;p__Chloroflexota;c__Dehalococcoidia;o__SAR202;f__UBA826;g__GCA-2717465;s__GCA-2717465 sp002717465	d__Bacteria;p__Chloroflexota;c__Dehalococcoidia;o__CAJWPE01;f__UBA826;g__GCA-2717465;s__GCA-2717465 sp002717465
Chloroflexota	GB_GCA_002722155.1	d__Bacteria;p__Chloroflexota;c__Dehalococcoidia;o__SAR202;f__UBA826;g__UBA11996;s__UBA11996 sp002722155	d__Bacteria;p__Chloroflexota;c__Dehalococcoidia;o__CAJWPE01;f__UBA826;g__UBA11996;s__UBA11996 sp002722155
Chloroflexota	GB_GCA_002718095.1	d__Bacteria;p__Chloroflexota;c__Dehalococcoidia;o__SAR202;f__UBA826;g__UBA826;s__UBA826 sp002718095	d__Bacteria;p__Chloroflexota;c__Dehalococcoidia;o__CAJWPE01;f__UBA826;g__UBA826;s__UBA826 sp002718095
Chloroflexota	GB_GCA_002714085.1	d__Bacteria;p__Chloroflexota;c__Dehalococcoidia;o__UBA1151;f__Bin127;g__GCA-002725925;s__GCA-002725925 sp002714085	d__Bacteria;p__Chloroflexota;c__Dehalococcoidia;o__Lucifugimonadales;f__Lucifugimonadaceae;g__Lucifugimonas;s__Lucifugimonas sp009392785
Chloroflexota	GB_GCA_002311385.1	d__Bacteria;p__Chloroflexota;c__Dehalococcoidia;o__UBA3495;f__UBA3495;g__UBA1141;s__UBA1141 sp002311385	d__Bacteria;p__Chloroflexota;c__Dehalococcoidia;o__UBA3495;f__UBA3495;g__UBA1141;s__UBA1141 sp002311385
Chloroflexota	GB_GCA_002816455.1	d__Bacteria;p__Chloroflexota;c__Dehalococcoidia;o__UBA3495;f__UBA3495;g__UBA1141;s__UBA1141 sp002816455	d__Bacteria;p__Chloroflexota;c__Dehalococcoidia;o__UBA3495;f__UBA3495;g__UBA1141;s__UBA1141 sp002816455
Chloroflexota	GB_GCA_002401285.1	d__Bacteria;p__Chloroflexota;c__Dehalococcoidia;o__UBA3495;f__UBA3495;g__UBA11650;s__UBA11650 sp002401285
Chloroflexota	GB_GCA_002328185.1	d__Bacteria;p__Chloroflexota;c__Dehalococcoidia;o__UBA3495;f__UBA3495;g__UBA9611;s__UBA9611 sp002328185	d__Bacteria;p__Chloroflexota;c__Dehalococcoidia;o__UBA3495;f__UBA3495;g__UBA9611;s__UBA9611 sp002328185
Chloroflexota	GB_GCA_002698265.1	d__Bacteria;p__Chloroflexota;c__Dehalococcoidia;o__UBA3495;f__UBA3495;g__UBA9611;s__UBA9611 sp002698265	d__Bacteria;p__Chloroflexota;c__Dehalococcoidia;o__UBA3495;f__UBA3495;g__UBA9611;s__UBA9611 sp002698265
Chloroflexota	GB_GCA_002721995.1	d__Bacteria;p__Chloroflexota;c__Dehalococcoidia;o__UBA3495;f__UBA3495;g__UBA9611;s__UBA9611 sp002721995	d__Bacteria;p__Chloroflexota;c__Dehalococcoidia;o__UBA3495;f__UBA3495;g__UBA9611;s__UBA9611 sp002721995
Chloroflexota	GB_GCA_002730485.1	d__Bacteria;p__Chloroflexota;c__Dehalococcoidia;o__UBA3495;f__UBA3495;g__UBA9611;s__UBA9611 sp002730485
Chloroflexota	GB_GCA_002746355.1	d__Bacteria;p__Chloroflexota;c__Dehalococcoidia;o__UBA3495;f__UBA3495;g__UBA9611;s__UBA9611 sp002746355	d__Bacteria;p__Chloroflexota;c__Dehalococcoidia;o__UBA3495;f__UBA3495;g__UBA9611;s__UBA9611 sp002746355
Chloroflexota	GB_GCA_002816585.1	d__Bacteria;p__Chloroflexota;c__Dehalococcoidia;o__UBA3495;f__UBA3495;g__UBA9611;s__UBA9611 sp002816585
Chloroflexota	GB_GCA_005889405.1	d__Bacteria;p__Chloroflexota;c__Ellin6529;o__P2-11E;f__P2-11E;g__CF-39;s__CF-39 sp005889405	d__Bacteria;p__Chloroflexota;c__Limnocylindria;o__P2-11E;f__P2-11E;g__CF-39;s__CF-39 sp005889405
nitrate-dependent sulfur oxidation	RS_GCF_000012965.1	d__Bacteria;p__Campylobacterota;c__Campylobacteria;o__Campylobacterales;f__Sulfurimonadaceae;g__Sulfurimonas;s__Sulfurimonas denitrificans	d__Bacteria;p__Campylobacterota;c__Campylobacteria;o__Campylobacterales;f__Sulfurimonadaceae;g__Sulfurimonas;s__Sulfurimonas denitrificans
nitrate-dependent sulfur oxidation	RS_GCF_000445475.1	d__Bacteria;p__Campylobacterota;c__Campylobacteria;o__Campylobacterales;f__Sulfurimonadaceae;g__Sulfurimonas;s__Sulfurimonas hongkongensis	d__Bacteria;p__Campylobacterota;c__Campylobacteria;o__Campylobacterales;f__Sulfurimonadaceae;g__Sulfurimonas;s__Sulfurimonas hongkongensis
nitrate-dependent sulfur oxidation	GB_GCA_000743525.1	d__Bacteria;p__Campylobacterota;c__Campylobacteria;o__Campylobacterales;f__Sulfurospirillaceae;g__Sulfurospirillum;s__Sulfurospirillum sp000743525	d__Bacteria;p__Campylobacterota;c__Campylobacteria;o__Campylobacterales;f__Sulfurospirillaceae;g__Sulfurospirillum;s__Sulfurospirillum sp000743525
nitrate-dependent sulfur oxidation	GB_GCA_000987835.1	d__Bacteria;p__Campylobacterota;c__Campylobacteria;o__Campylobacterales;f__Sulfurovaceae;g__Sulfurovum;s__Sulfurovum lithotrophicum	d__Bacteria;p__Campylobacterota;c__Campylobacteria;o__Campylobacterales;f__Sulfurovaceae;g__Sulfurovum;s__Sulfurovum lithotrophicum
nitrate-dependent sulfur oxidation	RS_GCF_001595645.1	d__Bacteria;p__Campylobacterota;c__Campylobacteria;o__Campylobacterales;f__Sulfurovaceae;g__Sulfurovum;s__Sulfurovum riftiae	d__Bacteria;p__Campylobacterota;c__Campylobacteria;o__Campylobacterales;f__Sulfurovaceae;g__Sulfurovum;s__Sulfurovum riftiae
nitrate-dependent sulfur oxidation	GB_GCA_003599475.1	d__Bacteria;p__Desulfobacterota;c__Desulfobacteria;o__Desulfobacterales;f__SURF-15;g__SURF-15;s__SURF-15 sp003599475
nitrate-dependent sulfur oxidation	GB_GCA_002328165.1	d__Bacteria;p__Desulfobacterota;c__Desulfobacteria;o__Desulfobacterales;f__UBA2156;g__UBA2156;s__UBA2156 sp002328165	d__Bacteria;p__Desulfobacterota;c__Desulfobacteria;o__Desulfobacterales;f__UBA2156;g__UBA2156;s__UBA2156 sp002328165
nitrate-dependent sulfur oxidation	GB_GCA_002413355.1	d__Bacteria;p__Desulfobacterota;c__Desulfobulbia;o__Desulfobulbales;f__Desulfobulbaceae;g__Electronema;s__Electronema sp002413355	d__Bacteria;p__Desulfobacterota;c__Desulfobulbia;o__Desulfobulbales;f__Desulfobulbaceae;g__Electronema;s__Electronema sp002413355
nitrate-dependent sulfur oxidation	GB_GCA_004284765.1	d__Bacteria;p__Desulfobacterota;c__Desulfobulbia;o__Desulfobulbales;f__Desulfobulbaceae;g__Electronema;s__Electronema sp004284765	d__Bacteria;p__Desulfobacterota;c__Desulfobulbia;o__Desulfobulbales;f__Desulfobulbaceae;g__Electronema;s__Electronema aureum
nitrate-dependent sulfur oxidation	RS_GCF_000092205.1	d__Bacteria;p__Desulfobacterota;c__Desulfobulbia;o__Desulfobulbales;f__Desulfurivibrionaceae;g__Desulfurivibrio;s__Desulfurivibrio alkaliphilus	d__Bacteria;p__Desulfobacterota;c__Desulfobulbia;o__Desulfobulbales;f__Desulfurivibrionaceae;g__Desulfurivibrio;s__Desulfurivibrio alkaliphilus
nitrate-dependent sulfur oxidation	GB_GCA_002298965.1	d__Bacteria;p__Proteobacteria;c__Alphaproteobacteria;o__Rhizobiales;f__Ancalomicrobiaceae;g__Siculibacillus;s__Siculibacillus sp002298965	d__Bacteria;p__Pseudomonadota;c__Alphaproteobacteria;o__Rhizobiales;f__Ancalomicrobiaceae;g__Pinisolibacter;s__Pinisolibacter sp002298965
nitrate-dependent sulfur oxidation	GB_GCA_003228955.1	d__Bacteria;p__Proteobacteria;c__Alphaproteobacteria;o__Rhizobiales;f__Methyloligellaceae;g__UBA2767;s__UBA2767 sp003228955	d__Bacteria;p__Pseudomonadota;c__Alphaproteobacteria;o__Rhizobiales;f__Methyloligellaceae;g__UBA2767;s__UBA2767 sp003228955
nitrate-dependent sulfur oxidation	GB_GCA_003633525.1	d__Bacteria;p__Proteobacteria;c__Alphaproteobacteria;o__Rhodobacterales;f__Rhodobacteraceae;g__Paracoccus;s__Paracoccus pantotrophus	d__Bacteria;p__Pseudomonadota;c__Alphaproteobacteria;o__Rhodobacterales;f__Rhodobacteraceae;g__Paracoccus;s__Paracoccus pantotrophus
nitrate-dependent sulfur oxidation	GB_GCA_002687515.1	d__Bacteria;p__Proteobacteria;c__Alphaproteobacteria;o__Rhodospirillales;f__UBA2165;g__GCA-2687515;s__GCA-2687515 sp002687515	d__Bacteria;p__Pseudomonadota;c__Alphaproteobacteria;o__Rhodospirillales;f__UBA2165;g__GCA-2687515;s__GCA-2687515 sp002687515
nitrate-dependent sulfur oxidation	GB_GCA_002753155.1	d__Bacteria;p__Proteobacteria;c__Alphaproteobacteria;o__Rhodospirillales;f__WMHbin7;g__WMHbin7;s__WMHbin7 sp002753155	d__Bacteria;p__Pseudomonadota;c__Alphaproteobacteria;o__Rhodospirillales;f__WMHbin7;g__WMHbin7;s__WMHbin7 sp002753155
nitrate-dependent sulfur oxidation	GB_GCA_002690215.1	d__Bacteria;p__Proteobacteria;c__Alphaproteobacteria;o__UBA2966;f__UBA2966;g__GCA-2690215;s__GCA-2690215 sp002690215	d__Bacteria;p__Pseudomonadota;c__Alphaproteobacteria;o__UBA2966;f__UBA2966;g__GCA-2690215;s__GCA-2690215 sp002690215
nitrate-dependent sulfur oxidation	GB_GCA_004298065.1	d__Bacteria;p__Proteobacteria;c__Gammaproteobacteria;o__Acidiferrobacterales;f__Sulfurifustaceae;g__SCRL01;s__SCRL01 sp004298065	d__Bacteria;p__Pseudomonadota;c__Gammaproteobacteria;o__Acidiferrobacterales;f__Sulfurifustaceae;g__SCRL01;s__SCRL01 sp004298065
nitrate-dependent sulfur oxidation	GB_GCA_001640045.1	d__Bacteria;p__Proteobacteria;c__Gammaproteobacteria;o__Beggiatoales;f__Beggiatoaceae;g__Thiomargarita;s__Thiomargarita nelsonii_A	d__Bacteria;p__Pseudomonadota;c__Gammaproteobacteria;o__Beggiatoales;f__Beggiatoaceae;g__Thiomargarita;s__Thiomargarita nelsonii_A
nitrate-dependent sulfur oxidation	GB_GCA_001464765.1	d__Bacteria;p__Proteobacteria;c__Gammaproteobacteria;o__Burkholderiales;f__Ga0077523;g__Ga0077526;s__Ga0077526 sp001464765	d__Bacteria;p__Pseudomonadota;c__Gammaproteobacteria;o__Burkholderiales;f__Ga0077523;g__Ga0077523;s__Ga0077523 sp001464765
nitrate-dependent sulfur oxidation	GB_GCA_002278935.1	d__Bacteria;p__Proteobacteria;c__Gammaproteobacteria;o__Burkholderiales;f__Gallionellaceae;g__39-52-133;s__39-52-133 sp002278935	d__Bacteria;p__Pseudomonadota;c__Gammaproteobacteria;o__Burkholderiales;f__Gallionellaceae;g__39-52-133;s__39-52-133 sp002278935
nitrate-dependent sulfur oxidation	GB_GCA_002632355.1	d__Bacteria;p__Proteobacteria;c__Gammaproteobacteria;o__Burkholderiales;f__Sulfuricellaceae;g__Sulfuricella_A;s__Sulfuricella_A denitrificans_A	d__Bacteria;p__Pseudomonadota;c__Gammaproteobacteria;o__Burkholderiales;f__Sulfuricellaceae;g__Sulfurimicrobium;s__Sulfurimicrobium denitrificans_A
nitrate-dependent sulfur oxidation	RS_GCF_001530125.1	d__Bacteria;p__Proteobacteria;c__Gammaproteobacteria;o__Burkholderiales;f__Thiobacillaceae;g__Thiobacillus;s__Thiobacillus denitrificans_C	d__Bacteria;p__Pseudomonadota;c__Gammaproteobacteria;o__Burkholderiales;f__Thiobacillaceae;g__Thiobacillus;s__Thiobacillus denitrificans_C
nitrate-dependent sulfur oxidation	GB_GCA_003105245.1	d__Bacteria;p__Proteobacteria;c__Gammaproteobacteria;o__Burkholderiales;f__UKL13-2;g__FEB-7;s__FEB-7 sp003105245	d__Bacteria;p__Pseudomonadota;c__Gammaproteobacteria;o__Burkholderiales;f__Usitatibacteraceae;g__FEB-7;s__FEB-7 sp003105245
nitrate-dependent sulfur oxidation	RS_GCF_001007875.1	d__Bacteria;p__Proteobacteria;c__Gammaproteobacteria;o__Chromatiales;f__Sedimenticolaceae;g__Sedimenticola;s__Sedimenticola thiotaurini	d__Bacteria;p__Pseudomonadota;c__Gammaproteobacteria;o__Chromatiales;f__Sedimenticolaceae;g__Sedimenticola;s__Sedimenticola thiotaurini
nitrate-dependent sulfur oxidation	RS_GCF_003337735.1	d__Bacteria;p__Proteobacteria;c__Gammaproteobacteria;o__DSM-26407;f__DSM-26407;g__Thioalbus;s__Thioalbus denitrificans	d__Bacteria;p__Pseudomonadota;c__Gammaproteobacteria;o__DSM-26407;f__DSM-26407;g__Thioalbus;s__Thioalbus denitrificans
nitrate-dependent sulfur oxidation	RS_GCF_000321415.2	d__Bacteria;p__Proteobacteria;c__Gammaproteobacteria;o__Ectothiorhodospirales;f__Thioalkalivibrionaceae;g__Thioalkalivibrio_B;s__Thioalkalivibrio_B nitratireducens	d__Bacteria;p__Pseudomonadota;c__Gammaproteobacteria;o__Ectothiorhodospirales;f__Ectothiorhodospiraceae;g__Thioalkalivibrio;s__Thioalkalivibrio nitratireducens
nitrate-dependent sulfur oxidation	GB_GCA_002733465.1	d__Bacteria;p__Proteobacteria;c__Gammaproteobacteria;o__Enterobacterales;f__Kangiellaceae;g__GCA-002733465;s__GCA-002733465 sp002733465	d__Bacteria;p__Pseudomonadota;c__Gammaproteobacteria;o__Enterobacterales;f__Kangiellaceae;g__GCA-002733465;s__GCA-002733465 sp002733465
nitrate-dependent sulfur oxidation	RS_GCF_001293165.1	d__Bacteria;p__Proteobacteria;c__Gammaproteobacteria;o__PS1;f__Thioglobaceae;g__Thioglobus_A;s__Thioglobus_A autotrophicus	d__Bacteria;p__Pseudomonadota;c__Gammaproteobacteria;o__PS1;f__Pseudothioglobaceae;g__Thioglobus_A;s__Thioglobus_A autotrophicus
nitrate-dependent sulfur oxidation	GB_GCA_003349885.1	d__Bacteria;p__Proteobacteria;c__Gammaproteobacteria;o__SZUA-229;f__SZUA-229;g__SZUA-229;s__SZUA-229 sp003349885	d__Bacteria;p__Pseudomonadota;c__Gammaproteobacteria;o__SZUA-229;f__SZUA-229;g__SZUA-229;s__SZUA-229 sp003349885
nitrate-dependent sulfur oxidation	RS_GCF_900102855.1	d__Bacteria;p__Proteobacteria;c__Gammaproteobacteria;o__Thiohalomonadales;f__Thiohalomonadaceae;g__Thiohalomonas;s__Thiohalomonas denitrificans	d__Bacteria;p__Pseudomonadota;c__Gammaproteobacteria;o__Thiohalomonadales;f__Thiohalomonadaceae;g__Thiohalomonas;s__Thiohalomonas denitrificans
nitrate-dependent sulfur oxidation	RS_GCF_001399755.1	d__Bacteria;p__Proteobacteria;c__Gammaproteobacteria;o__Thiohalorhabdales;f__Thiohalorhabdaceae;g__Thiohalorhabdus;s__Thiohalorhabdus denitrificans	d__Bacteria;p__Pseudomonadota;c__Gammaproteobacteria;o__Thiohalorhabdales;f__Thiohalorhabdaceae;g__Thiohalorhabdus;s__Thiohalorhabdus denitrificans
nitrate-dependent sulfur oxidation	GB_GCA_002327725.1	d__Bacteria;p__Proteobacteria;c__Gammaproteobacteria;o__UBA10353;f__LS-SOB;g__UBA868;s__UBA868 sp002327725	d__Bacteria;p__Pseudomonadota;c__Gammaproteobacteria;o__Arenicellales;f__UBA868;g__UBA868;s__UBA868 sp002327725
nitrate-dependent sulfur oxidation	GB_GCA_003598065.1	d__Bacteria;p__SURF-8;c__SURF-8;o__SURF-8;f__SURF-8;g__SURF-8;s__SURF-8 sp003598065	d__Bacteria;p__Myxococcota;c__SURF-8;o__SURF-8;f__SURF-8;g__SURF-8;s__SURF-8 sp003598065
photoautotrophic sulfur oxidation	GB_GCA_002708825.1	d__Bacteria;p__Proteobacteria;c__Alphaproteobacteria;o__Rhizobiales;f__Rhizobiaceae;g__Zhengella;s__Zhengella sp002708825	d__Bacteria;p__Pseudomonadota;c__Alphaproteobacteria;o__Rhizobiales;f__Rhizobiaceae;g__Zhengella;s__Zhengella sp002708825
photoautotrophic sulfur oxidation	RS_GCF_003258835.1	d__Bacteria;p__Proteobacteria;c__Alphaproteobacteria;o__Rhizobiales;f__Rhodobiaceae;g__Rhodobium;s__Rhodobium orientis	d__Bacteria;p__Pseudomonadota;c__Alphaproteobacteria;o__Rhizobiales;f__Rhodobiaceae;g__Rhodobium;s__Rhodobium orientis
photoautotrophic sulfur oxidation	RS_GCF_001402875.1	d__Bacteria;p__Proteobacteria;c__Alphaproteobacteria;o__Rhizobiales;f__Xanthobacteraceae;g__Blastochloris;s__Blastochloris viridis	d__Bacteria;p__Pseudomonadota;c__Alphaproteobacteria;o__Rhizobiales;f__Xanthobacteraceae;g__Blastochloris;s__Blastochloris viridis
photoautotrophic sulfur oxidation	RS_GCF_003258805.1	d__Bacteria;p__Proteobacteria;c__Alphaproteobacteria;o__Rhizobiales;f__Xanthobacteraceae;g__Rhodoplanes;s__Rhodoplanes elegans	d__Bacteria;p__Pseudomonadota;c__Alphaproteobacteria;o__Rhizobiales;f__Xanthobacteraceae;g__Rhodoplanes;s__Rhodoplanes elegans
photoautotrophic sulfur oxidation	RS_GCF_003258865.1	d__Bacteria;p__Proteobacteria;c__Alphaproteobacteria;o__Rhizobiales;f__Xanthobacteraceae;g__Rhodoplanes;s__Rhodoplanes roseus	d__Bacteria;p__Pseudomonadota;c__Alphaproteobacteria;o__Rhizobiales;f__Xanthobacteraceae;g__Rhodoplanes;s__Rhodoplanes roseus
photoautotrophic sulfur oxidation	RS_GCF_000013365.1	d__Bacteria;p__Proteobacteria;c__Alphaproteobacteria;o__Rhizobiales;f__Xanthobacteraceae;g__Rhodopseudomonas;s__Rhodopseudomonas palustris_J	d__Bacteria;p__Pseudomonadota;c__Alphaproteobacteria;o__Rhizobiales;f__Xanthobacteraceae;g__Rhodopseudomonas;s__Rhodopseudomonas palustris_J
photoautotrophic sulfur oxidation	GB_GCA_002695745.2	d__Bacteria;p__Proteobacteria;c__Alphaproteobacteria;o__Rhodobacterales;f__Rhodobacteraceae;g__GCA-002705045;s__GCA-002705045 sp002695745
photoautotrophic sulfur oxidation	GB_GCA_002699695.2	d__Bacteria;p__Proteobacteria;c__Alphaproteobacteria;o__Rhodobacterales;f__Rhodobacteraceae;g__GCA-002705045;s__GCA-002705045 sp002699695	d__Bacteria;p__Pseudomonadota;c__Alphaproteobacteria;o__Rhodobacterales;f__Rhodobacteraceae;g__CACIIZ01;s__CACIIZ01 sp002699695
photoautotrophic sulfur oxidation	GB_GCA_002705045.2	d__Bacteria;p__Proteobacteria;c__Alphaproteobacteria;o__Rhodobacterales;f__Rhodobacteraceae;g__GCA-002705045;s__GCA-002705045 sp002705045	d__Bacteria;p__Pseudomonadota;c__Alphaproteobacteria;o__Rhodobacterales;f__Rhodobacteraceae;g__GCA-002705045;s__GCA-002705045 sp002705045
photoautotrophic sulfur oxidation	RS_GCF_900156655.1	d__Bacteria;p__Proteobacteria;c__Alphaproteobacteria;o__Rhodobacterales;f__Rhodobacteraceae;g__Rhodobacter;s__Rhodobacter aestuarii	d__Bacteria;p__Pseudomonadota;c__Alphaproteobacteria;o__Rhodobacterales;f__Rhodobacteraceae;g__Rhodobacter;s__Rhodobacter aestuarii
photoautotrophic sulfur oxidation	RS_GCF_900217815.1	d__Bacteria;p__Proteobacteria;c__Alphaproteobacteria;o__Rhodobacterales;f__Rhodobacteraceae;g__Rhodobacter;s__Rhodobacter maris	d__Bacteria;p__Pseudomonadota;c__Alphaproteobacteria;o__Rhodobacterales;f__Rhodobacteraceae;g__Rhodobacter;s__Rhodobacter maris
photoautotrophic sulfur oxidation	RS_GCF_003046545.1	d__Bacteria;p__Proteobacteria;c__Alphaproteobacteria;o__Rhodobacterales;f__Rhodobacteraceae;g__Rhodovulum;s__Rhodovulum imhoffii	d__Bacteria;p__Pseudomonadota;c__Alphaproteobacteria;o__Rhodobacterales;f__Rhodobacteraceae;g__Rhodovulum;s__Rhodovulum imhoffii
photoautotrophic sulfur oxidation	RS_GCF_001633165.1	d__Bacteria;p__Proteobacteria;c__Alphaproteobacteria;o__Rhodobacterales;f__Rhodobacteraceae;g__Rhodovulum;s__Rhodovulum sulfidophilum	d__Bacteria;p__Pseudomonadota;c__Alphaproteobacteria;o__Rhodobacterales;f__Rhodobacteraceae;g__Rhodovulum;s__Rhodovulum sulfidophilum
photoautotrophic sulfur oxidation	RS_GCF_900101965.1	d__Bacteria;p__Proteobacteria;c__Alphaproteobacteria;o__Rhodospirillales;f__Rhodospirillaceae;g__Rhodospira;s__Rhodospira trueperi	d__Bacteria;p__Pseudomonadota;c__Alphaproteobacteria;o__Rhodospirillales;f__Rhodospirillaceae;g__Rhodospira;s__Rhodospira trueperi
photoautotrophic sulfur oxidation	RS_GCF_000013085.1	d__Bacteria;p__Proteobacteria;c__Alphaproteobacteria;o__Rhodospirillales;f__Rhodospirillaceae;g__Rhodospirillum;s__Rhodospirillum rubrum	d__Bacteria;p__Pseudomonadota;c__Alphaproteobacteria;o__Rhodospirillales;f__Rhodospirillaceae;g__Rhodospirillum;s__Rhodospirillum rubrum
photoautotrophic sulfur oxidation	GB_GCA_002454975.1	d__Bacteria;p__Proteobacteria;c__Gammaproteobacteria;o__Burkholderiales;f__Burkholderiaceae;g__Hylemonella;s__Hylemonella sp002454975	d__Bacteria;p__Pseudomonadota;c__Gammaproteobacteria;o__Burkholderiales;f__Burkholderiaceae;g__Hylemonella;s__Hylemonella sp002454975
photoautotrophic sulfur oxidation	RS_GCF_001938565.1	d__Bacteria;p__Proteobacteria;c__Gammaproteobacteria;o__Burkholderiales;f__Burkholderiaceae;g__Rhodoferax;s__Rhodoferax antarcticus	d__Bacteria;p__Pseudomonadota;c__Gammaproteobacteria;o__Burkholderiales;f__Burkholderiaceae;g__Rhodoferax;s__Rhodoferax antarcticus
photoautotrophic sulfur oxidation	RS_GCF_000190375.1	d__Bacteria;p__Proteobacteria;c__Gammaproteobacteria;o__Burkholderiales;f__Burkholderiaceae;g__Rubrivivax;s__Rubrivivax benzoatilyticus	d__Bacteria;p__Pseudomonadota;c__Gammaproteobacteria;o__Burkholderiales;f__Burkholderiaceae;g__Rubrivivax;s__Rubrivivax benzoatilyticus
photoautotrophic sulfur oxidation	GB_GCA_002386465.1	d__Bacteria;p__Proteobacteria;c__Gammaproteobacteria;o__Burkholderiales;f__Burkholderiaceae;g__UBA4615;s__UBA4615 sp002386465	d__Bacteria;p__Pseudomonadota;c__Gammaproteobacteria;o__Burkholderiales;f__Burkholderiaceae;g__UBA4615;s__UBA4615 sp002386465
photoautotrophic sulfur oxidation	GB_GCA_003818495.1	d__Bacteria;p__Proteobacteria;c__Gammaproteobacteria;o__Burkholderiales;f__Burkholderiaceae;g__UBA4615;s__UBA4615 sp003818495	d__Bacteria;p__Pseudomonadota;c__Gammaproteobacteria;o__Burkholderiales;f__Burkholderiaceae;g__UBA4615;s__UBA4615 sp003818495
photoautotrophic sulfur oxidation	GB_GCA_001464765.1	d__Bacteria;p__Proteobacteria;c__Gammaproteobacteria;o__Burkholderiales;f__Ga0077523;g__Ga0077526;s__Ga0077526 sp001464765	d__Bacteria;p__Pseudomonadota;c__Gammaproteobacteria;o__Burkholderiales;f__Ga0077523;g__Ga0077523;s__Ga0077523 sp001464765
photoautotrophic sulfur oxidation	GB_GCA_001464895.1	d__Bacteria;p__Proteobacteria;c__Gammaproteobacteria;o__Burkholderiales;f__Ga0077523;g__Ga0077526;s__Ga0077526 sp001464895	d__Bacteria;p__Pseudomonadota;c__Gammaproteobacteria;o__Burkholderiales;f__Ga0077523;g__Ga0077523;s__Ga0077523 sp001464895
photoautotrophic sulfur oxidation	RS_GCF_000025485.1	d__Bacteria;p__Proteobacteria;c__Gammaproteobacteria;o__Chromatiales;f__Chromatiaceae;g__Allochromatium;s__Allochromatium vinosum	d__Bacteria;p__Pseudomonadota;c__Gammaproteobacteria;o__Chromatiales;f__Chromatiaceae;g__Thermochromatium;s__Thermochromatium vinosum
photoautotrophic sulfur oxidation	GB_GCA_003562815.1	d__Bacteria;p__Proteobacteria;c__Gammaproteobacteria;o__Chromatiales;f__Chromatiaceae;g__PWTO01;s__PWTO01 sp003562815	d__Bacteria;p__Pseudomonadota;c__Gammaproteobacteria;o__Chromatiales;f__Chromatiaceae;g__Lamprobacter;s__Lamprobacter sp003562815
photoautotrophic sulfur oxidation	RS_GCF_003634315.1	d__Bacteria;p__Proteobacteria;c__Gammaproteobacteria;o__Chromatiales;f__Chromatiaceae;g__Thiocapsa;s__Thiocapsa rosea	d__Bacteria;p__Pseudomonadota;c__Gammaproteobacteria;o__Chromatiales;f__Chromatiaceae;g__Thiocapsa;s__Thiocapsa rosea
photoautotrophic sulfur oxidation	RS_GCF_000224065.1	d__Bacteria;p__Proteobacteria;c__Gammaproteobacteria;o__Chromatiales;f__Chromatiaceae;g__Thiorhodococcus;s__Thiorhodococcus drewsii	d__Bacteria;p__Pseudomonadota;c__Gammaproteobacteria;o__Chromatiales;f__Chromatiaceae;g__Imhoffiella;s__Imhoffiella drewsii
photoautotrophic sulfur oxidation	RS_GCF_000228725.2	d__Bacteria;p__Proteobacteria;c__Gammaproteobacteria;o__Chromatiales;f__Chromatiaceae;g__Thiorhodovibrio;s__Thiorhodovibrio sp000228725	d__Bacteria;p__Pseudomonadota;c__Gammaproteobacteria;o__Chromatiales;f__Chromatiaceae;g__Thiorhodovibrio;s__Thiorhodovibrio frisius
photoautotrophic sulfur oxidation	RS_GCF_000015585.1	d__Bacteria;p__Proteobacteria;c__Gammaproteobacteria;o__Nitrococcales;f__Halorhodospiraceae;g__Halorhodospira;s__Halorhodospira halophila	d__Bacteria;p__Pseudomonadota;c__Gammaproteobacteria;o__Nitrococcales;f__Halorhodospiraceae;g__Halorhodospira;s__Halorhodospira halophila
arsenate-dependent sulfur oxidation	GB_GCA_002868945.1	d__Bacteria;p__Desulfobacterota;c__Desulfobulbia;o__Desulfobulbales;f__Desulfurivibrionaceae;g__BM506;s__BM506 sp002868945	d__Bacteria;p__Desulfobacterota;c__Desulfobulbia;o__Desulfobulbales;f__SURF-16;g__BM506;s__BM506 sp002868945
arsenate-dependent sulfur oxidation	GB_GCA_003557565.1	d__Bacteria;p__Desulfobacterota;c__Desulfobulbia;o__Desulfobulbales;f__Desulfurivibrionaceae;g__Desulfurivibrio;s__Desulfurivibrio sp003557565	d__Bacteria;p__Desulfobacterota;c__Desulfobulbia;o__Desulfobulbales;f__Desulfurivibrionaceae;g__Desulfurivibrio;s__Desulfurivibrio sp003557565
arsenate-dependent sulfur oxidation	GB_GCA_001799255.1	d__Bacteria;p__Desulfobacterota;c__Desulfobulbia;o__Desulfobulbales;f__Desulfurivibrionaceae;g__UBA2262;s__UBA2262 sp001799255	d__Bacteria;p__Desulfobacterota;c__Desulfobulbia;o__Desulfobulbales;f__Desulfurivibrionaceae;g__Thiovibrio;s__Thiovibrio sp001799255
arsenate-dependent sulfur oxidation	GB_GCA_001799285.1	d__Bacteria;p__Desulfobacterota;c__Desulfobulbia;o__Desulfobulbales;f__Desulfurivibrionaceae;g__UBA2262;s__UBA2262 sp001799285	d__Bacteria;p__Desulfobacterota;c__Desulfobulbia;o__Desulfobulbales;f__Desulfurivibrionaceae;g__Thiovibrio;s__Thiovibrio sp001799285
arsenate-dependent sulfur oxidation	GB_GCA_002347095.1	d__Bacteria;p__Desulfobacterota;c__Desulfobulbia;o__Desulfobulbales;f__Desulfurivibrionaceae;g__UBA2262;s__UBA2262 sp002347095	d__Bacteria;p__Desulfobacterota;c__Desulfobulbia;o__Desulfobulbales;f__Desulfurivibrionaceae;g__Thiovibrio;s__Thiovibrio sp002347095
arsenate-dependent sulfur oxidation	GB_GCA_002347185.1	d__Bacteria;p__Desulfobacterota;c__Desulfobulbia;o__Desulfobulbales;f__Desulfurivibrionaceae;g__UBA2262;s__UBA2262 sp002347185	d__Bacteria;p__Desulfobacterota;c__Desulfobulbia;o__Desulfobulbales;f__Desulfurivibrionaceae;g__Thiovibrio;s__Thiovibrio sp002347185
arsenate-dependent sulfur oxidation	GB_GCA_002841785.1	d__Bacteria;p__Desulfobacterota;c__Desulfobulbia;o__Desulfobulbales;f__Desulfurivibrionaceae;g__UBA2262;s__UBA2262 sp002841785	d__Bacteria;p__Desulfobacterota;c__Desulfobulbia;o__Desulfobulbales;f__Desulfurivibrionaceae;g__Thiovibrio;s__Thiovibrio sp002841785
arsenate-dependent sulfur oxidation	GB_GCA_003517965.1	d__Bacteria;p__Desulfobacterota;c__Desulfobulbia;o__Desulfobulbales;f__Desulfurivibrionaceae;g__UBA2262;s__UBA2262 sp003517965	d__Bacteria;p__Desulfobacterota;c__Desulfobulbia;o__Desulfobulbales;f__Desulfurivibrionaceae;g__Thiovibrio;s__Thiovibrio sp003517965
arsenate-dependent sulfur oxidation	GB_GCA_002421565.1	d__Bacteria;p__Desulfobacterota;c__Desulfobulbia;o__Desulfobulbales;f__Desulfurivibrionaceae;g__UBA5628;s__UBA5628 sp002421565	d__Bacteria;p__Desulfobacterota;c__Desulfobulbia;o__Desulfobulbales;f__Desulfurivibrionaceae;g__UBA5628;s__UBA5628 sp002421565
arsenate-dependent sulfur oxidation	GB_GCA_002869085.1	d__Bacteria;p__Proteobacteria;c__Alphaproteobacteria;o__Rhizobiales;f__BM303;g__BM303;s__BM303 sp002869085	d__Bacteria;p__Pseudomonadota;c__Alphaproteobacteria;o__Rhizobiales;f__BM303;g__BM303;s__BM303 sp002869085
arsenate-dependent sulfur oxidation	RS_GCF_003574675.1	d__Bacteria;p__Proteobacteria;c__Gammaproteobacteria;o__Burkholderiales;f__Burkholderiaceae;g__QOAZ01;s__QOAZ01 sp003574675	d__Bacteria;p__Pseudomonadota;c__Gammaproteobacteria;o__Burkholderiales;f__Burkholderiaceae;g__Calidifontimicrobium;s__Calidifontimicrobium sediminis
arsenate-dependent sulfur oxidation	GB_GCA_001771065.1	d__Bacteria;p__Proteobacteria;c__Gammaproteobacteria;o__Burkholderiales;f__Burkholderiaceae;g__Rhodoferax;s__Rhodoferax sp001771065	d__Bacteria;p__Pseudomonadota;c__Gammaproteobacteria;o__Burkholderiales;f__Burkholderiaceae;g__Rhodoferax;s__Rhodoferax sp001771065
arsenate-dependent sulfur oxidation	GB_GCA_007280205.1	d__Bacteria;p__Proteobacteria;c__Gammaproteobacteria;o__Burkholderiales;f__Burkholderiaceae;g__Rhodoferax;s__Rhodoferax sp007280205	d__Bacteria;p__Pseudomonadota;c__Gammaproteobacteria;o__Burkholderiales;f__Burkholderiaceae;g__Rhodoferax;s__Rhodoferax sp007280205
arsenate-dependent sulfur oxidation	RS_GCF_000828635.1	d__Bacteria;p__Proteobacteria;c__Gammaproteobacteria;o__Burkholderiales;f__Rhodocyclaceae;g__Sulfuritalea;s__Sulfuritalea hydrogenivorans	d__Bacteria;p__Pseudomonadota;c__Gammaproteobacteria;o__Burkholderiales;f__Rhodocyclaceae;g__Sulfuritalea;s__Sulfuritalea hydrogenivorans
arsenate-dependent sulfur oxidation	GB_GCA_006218025.1	d__Bacteria;p__Proteobacteria;c__Gammaproteobacteria;o__Burkholderiales;f__Rhodocyclaceae;g__Sulfuritalea;s__Sulfuritalea sp006218025	d__Bacteria;p__Pseudomonadota;c__Gammaproteobacteria;o__Burkholderiales;f__Rhodocyclaceae;g__Sulfuritalea;s__Sulfuritalea sp006218025
arsenate-dependent sulfur oxidation	GB_GCA_002347405.1	d__Bacteria;p__Proteobacteria;c__Gammaproteobacteria;o__Burkholderiales;f__Rhodocyclaceae;g__UBA2250;s__UBA2250 sp002347405	d__Bacteria;p__Pseudomonadota;c__Gammaproteobacteria;o__Burkholderiales;f__Rhodocyclaceae;g__Sulfuricystis;s__Sulfuricystis sp002347405
arsenate-dependent sulfur oxidation	GB_GCA_001770575.1	d__Bacteria;p__Proteobacteria;c__Gammaproteobacteria;o__Burkholderiales;f__SG8-39;g__2-12-FULL-64-23;s__2-12-FULL-64-23 sp001770575	d__Bacteria;p__Pseudomonadota;c__Gammaproteobacteria;o__Burkholderiales;f__SG8-39;g__2-12-FULL-64-23;s__2-12-FULL-64-23 sp001770575
arsenate-dependent sulfur oxidation	GB_GCA_004298385.1	d__Bacteria;p__Proteobacteria;c__Gammaproteobacteria;o__Burkholderiales;f__SG8-39;g__2-12-FULL-64-23;s__2-12-FULL-64-23 sp004298385	d__Bacteria;p__Pseudomonadota;c__Gammaproteobacteria;o__Burkholderiales;f__SG8-39;g__2-12-FULL-64-23;s__2-12-FULL-64-23 sp004298385
arsenate-dependent sulfur oxidation	GB_GCA_001772005.1	d__Bacteria;p__Proteobacteria;c__Gammaproteobacteria;o__Burkholderiales;f__SG8-41;g__2-12-FULL-62-58;s__2-12-FULL-62-58 sp001772005	d__Bacteria;p__Pseudomonadota;c__Gammaproteobacteria;o__Burkholderiales;f__SG8-41;g__DSOT01;s__DSOT01 sp001772005
arsenate-dependent sulfur oxidation	GB_GCA_003058495.1	d__Bacteria;p__Proteobacteria;c__Gammaproteobacteria;o__Chromatiales;f__Sedimenticolaceae;g__Thiodiazotropha;s__Thiodiazotropha sp003058495	d__Bacteria;p__Pseudomonadota;c__Gammaproteobacteria;o__Chromatiales;f__Sedimenticolaceae;g__Thiodiazotropha;s__Thiodiazotropha sp003058495
arsenate-dependent sulfur oxidation	GB_GCA_003058525.1	d__Bacteria;p__Proteobacteria;c__Gammaproteobacteria;o__Chromatiales;f__Sedimenticolaceae;g__Thiodiazotropha;s__Thiodiazotropha sp003058525	d__Bacteria;p__Pseudomonadota;c__Gammaproteobacteria;o__Chromatiales;f__Sedimenticolaceae;g__Thiodiazotropha;s__Thiodiazotropha sp003058525
arsenate-dependent sulfur oxidation	RS_GCF_000321415.2	d__Bacteria;p__Proteobacteria;c__Gammaproteobacteria;o__Ectothiorhodospirales;f__Thioalkalivibrionaceae;g__Thioalkalivibrio_B;s__Thioalkalivibrio_B nitratireducens	d__Bacteria;p__Pseudomonadota;c__Gammaproteobacteria;o__Ectothiorhodospirales;f__Ectothiorhodospiraceae;g__Thioalkalivibrio;s__Thioalkalivibrio nitratireducens
arsenate-dependent sulfur oxidation	RS_GCF_000227685.2	d__Bacteria;p__Proteobacteria;c__Gammaproteobacteria;o__Ectothiorhodospirales;f__Thioalkalivibrionaceae;g__Thioalkalivibrio_B;s__Thioalkalivibrio_B paradoxus	d__Bacteria;p__Pseudomonadota;c__Gammaproteobacteria;o__Ectothiorhodospirales;f__Ectothiorhodospiraceae;g__Thioalkalivibrio;s__Thioalkalivibrio paradoxus
arsenate-dependent sulfur oxidation	GB_GCA_003555285.1	d__Bacteria;p__Proteobacteria;c__Gammaproteobacteria;o__Ectothiorhodospirales;f__Thioalkalivibrionaceae;g__Thioalkalivibrio_B;s__Thioalkalivibrio_B sp003555285
arsenate-dependent sulfur oxidation	GB_GCA_003563455.1	d__Bacteria;p__Proteobacteria;c__Gammaproteobacteria;o__Ectothiorhodospirales;f__Thioalkalivibrionaceae;g__Thioalkalivibrio_B;s__Thioalkalivibrio_B sp003563455	d__Bacteria;p__Pseudomonadota;c__Gammaproteobacteria;o__Ectothiorhodospirales;f__Ectothiorhodospiraceae;g__Thioalkalivibrio;s__Thioalkalivibrio sp003563455
arsenate-dependent sulfur oxidation	GB_GCA_007116035.1	d__Bacteria;p__Proteobacteria;c__Gammaproteobacteria;o__Ectothiorhodospirales;f__Thioalkalivibrionaceae;g__Thioalkalivibrio_B;s__Thioalkalivibrio_B sp007116035	d__Bacteria;p__Pseudomonadota;c__Gammaproteobacteria;o__Ectothiorhodospirales;f__Ectothiorhodospiraceae;g__Thioalkalivibrio;s__Thioalkalivibrio sp007116035
